# Supplementary material for: A fast-growing basal troodontid (Dinosauria: Theropoda) from the latest Cretaceous of Europe
Source: Springer Nature journal article supplement (doi:10.1038/s41598-021-83745-5), 2021-03-01
Supplement: MOESM1 [file 41598_2021_83745_MOESM1_ESM.pdf]

## Supplementary Information

### **A fast-growing basal troodontid (Dinosauria: Theropoda) from the latest Cretaceous of Europe.**

Albert G. Sellés, Bernat Vila, Stephen L. Brusatte, Philip J. Currie, Àngel Galobart

**Table S1.** Measurements (mm) of the second metatarsal (MCD-7073) of *Tamarro insperatus*. Estimated values are indicated between brackets.

|                                                                 |              |
|-----------------------------------------------------------------|--------------|
| Maximum length of the metatarsal II                             | 10.52 (14.0) |
| Maximum depth (proximodistal) of the mid-shaft of metatarsal II | 8.89         |
| Maximum width (lateromedial) of the mid-shaft of metatarsal II  | 6.17         |
| Maximum depth of the distal articulation of metatarsal II       | 9.85         |
| Maximum width of the distal articulation of metatarsal II       | 9.55         |

**Table S2.** Measures (mm) of the length of the second metatarsal in selected Troodontidae taxa used as a proxy of relative body size. Data was primarily extracted from the Theropod Database developed by Mickey Mortimer ([www.therpoddatabase.com](http://www.therpoddatabase.com) 11/10/20).

| Sub-groups           | Taxa                                              | Specimen        | MtII length |
|----------------------|---------------------------------------------------|-----------------|-------------|
| Sinovenatorinae      | <i>Sinovenator changii</i>                        | IVPP V 12615    | 77          |
| Sinovenatorinae      | <i>Sinovenator changii</i>                        | IVPP V12583     | 79          |
| Sinovenatorinae      | <i>Mei long</i>                                   | DNHM D2514      | 42.5        |
| Sinovenatorinae      | <i>Mei long</i>                                   | IVPP V12733     | 51          |
| Jinfengopterigine    | <i>Jinfengopteryx elegans</i>                     | CAGS-IG-04-0801 | 59          |
| Jinfengopterigine    | <i>Liaoningvenator curriei</i>                    | DNHM D3012      | 82          |
| Jinfengopterigine    | <i>Philovenator curriei</i>                       | IVPP V10597     | 94          |
| Jinfengopterigine    | Unnamed                                           | IGM 100/1128    | 71.8        |
| Jinfengopterigine    | <b><i>Tamarro insperatus</i> gen. et sp. nov.</b> | <b>MCD-7073</b> | <b>140</b>  |
| Derived troodontidae | <i>Sinusergianus magnodens</i>                    | IVPP V11527     | 93.5        |
| Derived troodontidae | <i>Daliansaurus liaoningensis</i>                 | DNHM D2885      | 98.1        |
| Derived troodontidae | <i>Tochisaurus nemegtensis</i>                    | PIN 551-244     | 233         |
| Derived troodontidae | <i>Gobivenator mongoliensis</i>                   | IGM 100/86      | 145.2       |
| Derived troodontidae | <i>Sinornithoides youngi</i>                      | IVPP V9612      | 100.6       |
| Derived troodontidae | <i>Troodon formosus</i>                           | MOR 748         | 202.4       |
| Derived troodontidae | <i>Linhevenator tani</i>                          | LH V0021        | 120         |
| Derived troodontidae | <i>Talos sampsoni</i>                             | UMNH VP 19479   | 158.86      |

**Figure S1. Morphological comparison of the metatarsal II in maniraptoran theropods.** Each taxon is represented in dorsal, medial, and distal view. Main anatomical features that allow the taxonomic classification of *Tamarro insperatus gen. et sp. nov.* are indicated for each selected species if present. The arctometatarsalia condition and its variations are illustrated as the spatial configuration of the contact surfaces of Mt III and IV upon the medial surface of Mt II. All silhouettes were created by the authors using Adobe Illustrator CC 2015 2.1.

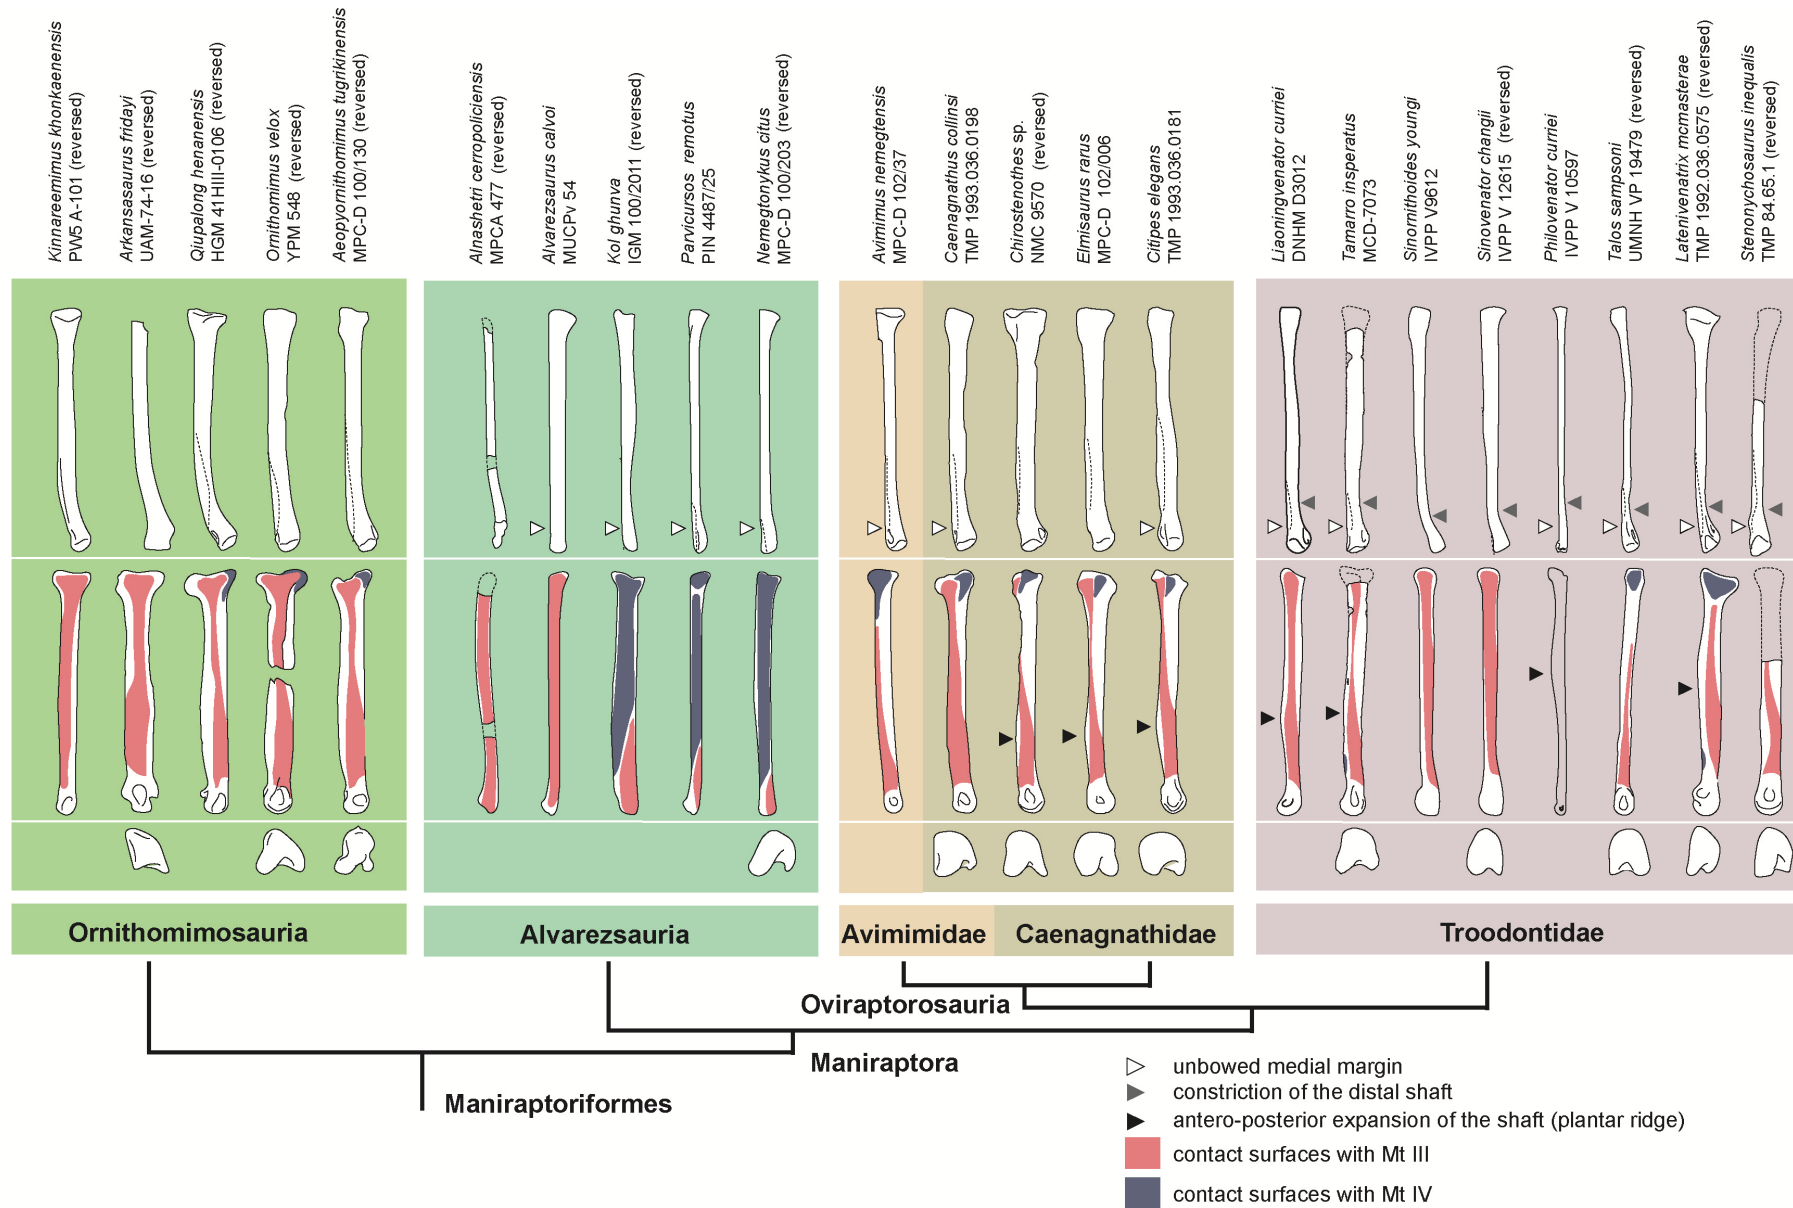

**Supplementary Text 1. Nexus file used in the phylogenetic exploration of *Tamarro insperatus gen. et. sp. nov.*** The matrix is based on Hartman et al.

#NEXUS

BEGIN TAXA;

TITLE Taxa;

DIMENSIONS NTAX=502;

TAXLABELS

Dilophosaurus Sinosaurus Cryolophosaurus Tachiraptor Berberosaurus Genyodectes Ceratosaurus  
Eoabelisaurus Rugops Rajasaurus Genusaurus Arcovenator Majungasaurus Dahalokely Rahiolisaurus  
MCF\_PVPH\_237 Xenotarsosaurus Ilokelesia Ekrixinatosaurus Skorpiovenator Viavenator Carnotaurus Aucasaurus  
Abelisaurus Noasaurus Velocisaurus Masiakasaurus Elaphrosaurus Afromimus Limusaurus Deltadromeus Gualicho  
Angeac\_taxon Chuandongocoelurus Monolophosaurus Pandoravenator Piatnitzkysaurus Condorraptor Marshosaurus  
Poeikilopleuron Duriavenator Megalosaurus Torvosaurus Wiehvenator Dubreuillosaurus Afrovenator Leshansaurus  
Eustreptospondylus Cristatusaurus Baryonyx Ichthyovenator Irritator Spinosaurus\_sensu\_lato Kaijiangosaurus  
Erectopus Xuanhanosaurus Yangchuanosaurus Shidaisaurus Metriacanthosaurus Sinraptor\_dongi hepingensis  
Siamotyrannus MNNGAD\_Kryptops\_postcran Allosaurus Saurophaganax Neovenator Acrocanthosaurus Labocania  
Shaochilong Concavenator Kelmaysisaurus Carcharodontosaurus iguidensis Tyrannotitan Mapusaurus Giganotosaurus  
Datanglong Gasosaurus Lourinhanosaurus Chilantaisaurus Fukuiraptor Australovenator Megaraptor Murusraptor  
Orkoraptor Aerosteon Kileskus Proceratosaurus Guanlong Mirischia Sinotyrannus Yutyranus Dilong Juratyrant  
Xionguanlong Eotyrannus Alectrosaurus Appalachiosaurus Bistahieversor Raptorex Gorgosaurus Alioramus  
Tyrannosaurus Coelurus Tanycolagreus Aristosuchus Biceratops Xinjiangovenator Zuolong Zuni Ornitholestes  
Sinocalliopteryx Huaxiagnathus Juravenator Aniksosaurus Archaeornithoides Scipionyx Tugulusaurus Sinosauropteryx  
Santanaraptor Haplocheirus Compsognathus Scieurumimus NGMC2124 Aorun Naze\_dromaeosaur Deinocheirus  
Hexing Shenzhousaurus Harpymimus Nedcolbertia Arkansaurus Archaeornithomimus\_asiaticus GIN960910KD  
Beishanlong Garudimimus Aepyornithomimus Sinornithomimus Ornithomimus Cerro\_del\_Pueblo\_orn Tototlmimus  
mongoliensis MNAPI1762A sedens\_holotype\_only Rativates Struthiomimus Gallimimus bullatus Timimus Anserimimus  
Qiupalong Dromiceiomimus Kinnareemimus Fukuivenator Nqwebasaurus Pelecanimimus Patagonykus Xiyunykus  
Bonapartenykus Bannykus Alvarezsaurus Achillesaurus Alnashetri Albertonykus Ceratonykus Qiupanykus Albinykus  
Xixianykus Linhenykus Heptasteornis Bradycneme Parvicursor Tugrik\_parvicursorine Shuvuuia Mononykus  
Martharaptor Falcarius Jianchangosaurus Beipiaosaurus Alxasaurus Enigmosaurus zheziangensis Suzhousaurus  
Neimongosaurus Erliansaurus Therizinosaurus\_minus\_hindlimb Nanchao\_embryos Nanshiungosaurus\_brevispinus  
bohlini AMNH6368 Segnosaurus Erlikosaurus Nothronychus\_mckinleyi graffami Protarchaeopteryx Similicaudipteryx  
Ganzhousaurus Caudipteryx Shanyangosaurus Kol Avimimus Machairasaurus Caenagnathasia\_dentaries\_only  
Hagryphus Apatosauraptor Leptorhynchus\_gaddisi Elmisaurus\_rarus elegans Chirolestes\_sensu\_lato Anzu Luoyangia  
Incisivosaurus Microvenator Beibelong Gigantoraptor Tongtianlong Oviraptor Banji Yulong Huanansaurus Wulatelong  
Corythoraptor NXMV Nomingia Rinchenia Nankangia IVPV9608 IGM10042 Citipati Anomalipes Shixinggia Khaan  
Conchoraptor Jiangxisaurus Nemegtomaia Heyuannia yanshini Scansoriopteryx Yi Epidexipteryx Pedopenna Caihong  
Serikornis Anchiornis Aurornis Eosinopteryx Ostromia Archaeopteryx Shanag BYU2023 ISMDVP09 Halszkaraptor  
Mahakala Ningyuansaurus Austroraptor Buitreraptor Pamparaptor Ornithodesmus Pyroraptor Rahonavis  
Unenlagia\_sensu\_lato Dakotaraptor Mei Xiaotingia Sinovenator Jianianhualong IGM100140 IGM100972\_100974 Almas  
Jinfengopteryx Liaoningvenator IGM1001128 IGM10044 Daliensaurus Toxosaurus Hesperornithoides Sinusonasus  
Xixiasaurus Byronosaurus Sinornithoides IVPV11119 Gobivenator Urbacodon\_mandibular\_only Geminiraptor  
Borogovia Sauroornithoides Zanabazar Troodon\_sensu\_lato Talos Tamarro\_inesperatus Philovenator Linhevenator  
Tianyuraptor Zhenyuanlong Acheroraptor Bambiraptor Variraptor Sinornithosaurus Microraptor Zhongjianosaurus  
osmolskae NGMC91 Changyuraptor Graciliraptor Yurgovuchia Deinonychus Utahraptor Achillobator Yixianosaurus  
Pneumatoraptor Saurornitholestes\_langstoni Atrociraptor IGM10022\_10023 Itemirus\_holotype\_only Linheraptor  
Tsaagan Dromaeosaurus Hulsanpes IGM100980 Velociraptor\_mongoliensis Luanchuanraptor Adasaurus DGBU\_78  
Zhongornis Hesperonychus\_holotype\_only Balaur Bauxitornis Sapeornis Zhongjianornis jianchangensis Jeholornis  
Jixiangornis Yangavis Eoconfuciusornis Proornis Confuciusornis\_sanctus dui chuonzhous Eopteryx Changchengornis  
Chongmingia Yandangornis Jinguoortis Wyleyia Protopteryx Paraprotopteryx Orientius Eopengornis Pengornis  
Elsornis Ootornis Yungavolucris Noguerosornis Iberomesornis LP\_4450\_IEI Concornis Cruralispennia Bohaiornis  
Parabohaiornis Longsunguis Shenqornis Sulcavis Zhouornis Fortunguavis Dunhuangia Yuanjiawaornis Eoenantiornis  
Huoshanornis Grabauornis Jibeinia Hebeiornis Gobipipus Gobipteryx Nanantius Gurilynia Holbotia Evgenavis  
Enantiophoenix Parvavis Monoenantiornis chabuensis Junornis Eocathayornis Houornis aberransis  
Cathayornis\_yandica Sinornis Linyornis Gracilornis Alethoalaornis Cuspirostrisornis Dapingfangornis Largirostrornis  
Longchengornis Microenantiornis Piscivorenantiornis Pterygornis Dalingheornis GMV2158 GMV2159 Liaoxiornis  
Avisaurus Gettyia Mirarce Soroavisaurus Neuquenornis Intiornis Enantiornis\_pectoral\_wing\_only  
Elbretornis\_holotype\_only Martinavis\_cruzyensis vincei saltariensis minor whetstonei Cratoavis Qiliania Feitianus  
CAGS\_IG\_02\_0901 CAGS\_IG\_04\_CM\_007 CAGS\_IG\_04\_CM\_023 Boluochia Longipteryx Shengjingornis  
Shanweiniaio Longirostravis Rapaxavis Halimornis Flexomornis Alexornis Xiangornis Eoalulavis Liaoningornis Vorona  
Lectavis Hollanda Aberratiodontus Bellulornis Archaeorhynchus Patagopteryx PMO228.582 Hongshanornis  
Archaeornithura Jianchangornis Schizooura Chaoyangia Changmaornis guozhangia Changzuornis Yanornis\_martini  
Yixianornis Songlingornis Tianyuornis Parahongshanornis Longicrusavis Iteravis Gansus Ambitortus Yumenornis  
Dingavis Juehuaornis Piscivoravis Mysteriornis Ichthyornis Gargantuavis Potamornis Enaliornis Chupkaornis  
Pasquiaornis Bapornis Bmongoliensis baileyi varneri Fumicollis Parahesperornis Hesperornis Horezmavis  
Maaqwi Jiuquanornis Eogranivora Qinornis Iaceornis Palintropus Apsaravis Lithornis Palaeotis Limenavis Struthio  
Tingmiatornis Chauna Polarornis Vegavis Anatalavis Presbyornis Teviornis Anas Gallinuloides Paraortygoides  
Sylviornis Meleagris Cerebavis Foro Columba

END;

BEGIN CHARACTERS;

TITLE 'Matrix in file "Hesperornithoides\_NEXUS\_matrix.nex";

DIMENSIONS NCHAR=700;

FORMAT DATATYPE = STANDARD RESPECTCASE GAP = - MISSING = ? SYMBOLS = " 0 1 2 3 4 5 6 7 8

9 N";

CHARSTATELABELS

1 'Primary and secondary remiges - width of leading vane ' /  
longer\_or\_subequal\_to\_trailing\_vane\_\_shorter\_than\_trailing\_vane\_,  
2 'External naris - posterior extent with maxilla ventral border horizontal ' /  
ends\_anterior\_to\_antorbital\_fossa\_\_extends\_posterior\_to\_anterior\_edge\_of\_antorbital\_fossa\_,  
3 'Nasal - dorsolateral surface posterior to external naris ' / solid\_pneumatized\_via\_fossae,  
4 'Maxilla - lateral surface of antorbital fossa anterior to antorbital fenestra ' / solid\_'with small  
maxillary fenestra entering maxillary antrum, greatest diameter <15% of orbit+jugal height 'with large maxillary fenestra  
15-27% of orbit+jugal height' with large maxillary fenestra >27% of orbit+jugal height',  
5 'Maxilla - lateral surface at ventral margin of antorbital fossa ' / fully\_visible\_laterally\_  
external\_surface\_projects\_dorsally\_to\_form\_a\_lip\_that\_overlaps\_ventral\_edge\_of\_antorbital\_fossa\_,  
6 'Maxilla - anteroposterior position of maxillary fenestra ' / 'close to anterior edge of antorbital  
fossa (distance between them <11% of orbit+jugal height)' far from anterior edge of antorbital fossa (>10%)',  
7 'Maxilla - lateral surface at anterior margin of antorbital fossa ' / solid\_  
with\_promaxillary\_fenestra\_entering\_promaxillary\_recess\_,  
8 'Orbit - length compared to height ' / '>66%' '<67%',  
9 'Postorbital - shape of anterior margin of ventral process ' / with\_projecting\_orbital\_process\_  
smoothly\_curved\_or\_straight\_,  
10 'Jugal and postorbital - convexity of posterior edge of postorbital bar ' / 'concave to minimally  
convex (0-5% of orbit+jugal height) ' 'strongly convex (>5%)',  
11 'Suborbital fenestra - size ' / 'greatest diameter >24% orbital height ' '<25%',  
12 'Braincase - separation of anterior tympanic and subotic recesses ' /  
separated\_by\_a\_surface\_which\_is\_not\_bounded\_by\_walls\_and\_depressed\_\_  
both\_within\_a\_common\_lateral\_depression\_bounded\_on\_all\_sides\_,  
13 'Basisphenoid - number of paired large foramina in basisphenoid recess ' / none\_  
at\_least\_one\_pair\_separated\_at\_midline\_,  
14 'Opisthotic - lateral extent of interfenestral crest ' / confluent\_with\_lateral\_surface\_  
depressed\_from\_lateral\_surface\_,  
15 'Exoccipital - convexity of posterior surface containing vagus (X), accessory (XI) and hypoglossal  
(XII) nerve foramina' / flat\_to\_convex 'concave, forming paracondylar recess',  
16 'Basisphenoid - pneumatic invasion of dorsolateral surface of basipterygoid process ' / flat\_  
excavated\_by\_an\_extension\_of\_the\_anterior\_tympanic\_recess\_,  
17 'Basisphenoid - pneumatic invasion of surface ventral to otic recess ' / 'excavated by subotic  
recess, an extension of the anterior temporal recess ' flat,  
18 'Basioccipital and basisphenoid - position of basisphenoid recess ' /  
between\_basisphenoid\_and\_basioccipital\_entirely\_within\_basisphenoid\_,  
19 'Basisphenoid - pneumatic invasion of ventral surface ' / pneumatic\_median\_recess\_present\_  
flat\_to\_convex\_,  
20 'Parasphenoid - transverse expansion of base of cultriform process ' / 'absent, process rodlike  
or vertically platelike ' present,  
21 'Basisphenoid - transverse angle of basipterygoid process ' /  
less\_than\_51\_degrees\_laterally\_from\_vertical\_\_>50\_degrees',  
22 'Basisphenoid - length of basipterygoid process ' / '>7% of median occipital condyle height '  
'<8% but present' absent,  
23 'Basisphenoid - pneumatic invasion of interior of basipterygoid process ' / 'absent, process solid '  
'present, process hollow',  
24 'Prootic - pneumatic invasion of lateral surface ' / flat\_  
excavated\_by\_shallow\_depression\_for\_dorsal\_tympanic\_recess  
excavated\_by\_posterolaterally\_directed\_cavity\_for\_dorsal\_tympanic\_recess\_,  
25 'Opisthotic - pneumatic invasion of surface dorsal to interfenestral crest ' / flat\_  
excavated\_by\_extension\_of\_posterior\_tympanic\_recess\_,  
26 'Opisthotic - pneumatic invasion of lateral surface of paroccipital process or inside otic recess ' /  
flat\_excavated\_by\_main\_diverticulum\_of\_posterior\_tympanic\_recess\_,  
27 'Opisthotic - position of main entrance of posterior tympanic recess ' /  
on\_anterior\_surface\_of\_paroccipital\_process\_opens\_into\_otic\_recess\_,  
28 'Premaxilla - length of subnarial process' / does\_not\_contact\_nasal\_\_'contacts nasal, but does  
not extend posterior to external naris' extends\_posterior\_to\_external\_naris\_,  
29 'Premaxillae - cross section of combined dorsal process ' /  
transversely\_compressed\_or\_not\_compressed\_\_dorsoventrally\_compressed\_,  
30 'Premaxillae - angle of symphysis in dorsal or ventral view ' / 'low, so that snout is pointed '  
'high, so that snout is rounded ',  
31 'Premaxilla - shape of ventral edge ' / smooth\_crenulated,  
32 'Maxilla - posterior extent of palatal shelf ' / 'anterior edge of choana placed <18% down maxillary  
length ' '>17%',  
33 'Maxilla - ventral projection of posteromedial portion of palatal shelf ' / absent\_'present, forming  
'tooth-like" process ',  
34 'Jugal - length of dorsal process ' / '>34% of orbit+jugal height, measured from lower edge of  
orbit' '<35% ',

35 'Postorbital - length of ventral process ' / 'height of orbit taken up by ventral process / orbital height <80% ' '>79%',

36 'Jugal - cross section of posterior process ' / transversely\_compressed\_\_ dorsoventrally\_or\_not\_compressed,

37 'Jugal - pneumatization of anterodorsal surface near antorbital fossa ' / 'present, surface invaded by pneumatic diverticulum of antorbital sinus ' 'absent, surface solid',

38 'Jugal - medial surface below postorbital process ' / penetrated\_by\_foramen\_solid,

39 'Quadratojugal - length of posterior process (defined as area posterior to intersection of ventral edge with line drawn along posterior edge of dorsal process) ' / '<36% of length of rest of quadratojugal ' '>35%',

40 'Quadratojugal - contact with jugal ' / sutured\_fused,

41 'Lacrima - projection of dorsal surface ' / unprojected\_ 'with lateral ridge or boss projecting dorsally, forming lacrimal horn ',

42 'Lacrima - lateral projection at dorsal edge ' / unprojected\_or\_minimally\_projected\_\_ strongly\_projected\_.

43 'Lacrima - surface at posterodorsal corner of antorbital fossa ' / solid\_ pneumatized\_via\_foramen,

44 'Lacrima - length of posterior process measured from anterior orbital edge ' / '<15% of ventral process length, measured from internal corner ' '15-30% ' '>30%',

45 'Lacrima - length of anterior process measured from internal corner ' / '<131% of ventral process length, measured from internal corner ' '>130% ',

46 'Prefrontal - size ' / 'large, greatest length >34% of orbit+jugal height ' 'small, <35% of orbit+jugal height ' absent\_or\_fused\_to\_another\_element,

47 'Nasals and frontals - angle of sutures from median to lateral edge of contact ' / 'anteriorly convex <60 degrees ' 'anteriorly\_convex\_60\_degrees\_or\_more\_to\_posteriorly\_convex,

48 'Frontal - convexity of supratemporal fossa edge ' / completely\_posteriorly\_concave\_to\_straight\_with\_posteriorly\_convex\_portion\_.

49 'Frontal - shape of orbital margin ' / straight\_to\_smoothly\_curved\_\_ abruptly\_angled\_at\_postorbital\_process,

50 'Frontal - shape of anterior edge of nasolacrimal articular surface ' / smooth\_ notched\_anterolaterally\_.

51 'Postorbital - curvature of anterior process ' / decurved\_to\_straight\_\_upcurved,

52 'Parietals - median proximity of supratemporal fossae ' / 'far, leaving flat dorsal surface between them ' 'close, separated by ridge forming sagittal crest ',

53 'Parietals - median contact ' / sutured\_fused,

54 'Squamosal - angle of ventral process ' / '<60 degrees from posterior quadrate edge ' '>59 degrees',

55 'Squamosal - lateral surface ' / smooth\_ 'horizontal ridge over ventral process, extends to posterior process ',

56 'Quadratojugal - extent of squamosal contact ' / contacting\_ 'non-contacting',

57 'Quadrate - divergence of otic articular surface ' / 'if present, articular surface confluent with shaft and squamosal head ' 'distinct\_otic\_head\_caused\_by\_intercotylar\_incisure,

58 'Quadrate - orientation of posterior edge compared to ventral margin of jugal + quadratojugal ' / 'inside angle <106 degrees ' '>105 degrees ',

59 'Quadrate - width from the paraquadrate foramen medial edge to the lateral edge of the dorsal quadrate ' / '<30% of width across quadrate condyles ' '>29%',

60 'Quadrate - pneumaticity ' / solid\_invaded\_by\_diverticulum\_of\_the\_tympanic\_airsac\_.

61 'Foramen magnum - dorsoventral elongation ' / transversely\_elongate\_or\_height\_and\_width\_equal\_height\_greater\_than\_width\_.

62 'Exoccipital and basioccipital - lateral margin of occipital condyle ' / posteromedially\_sloped\_ constricted\_forming\_condylar\_neck\_.

63 'Exoccipital - length of paroccipital process ' / 'height halfway out from lateral edge of occipital condyle / length from lateral edge of occipital condyle to tip of process <71% ' '>70%',

64 'Exoccipital - orientation of paroccipital process ' / 'long axis angled ventrally <41 degrees from horizontal ' '>40 degrees',

65 'Exoccipital - torsion of paroccipital process ' / untwisted\_ twisted\_so\_that\_distal\_ends\_face\_posterodorsally,

66 'Ectopterygoid - ventromedial surface ' / flat\_excavated\_by\_a\_pneumatic\_fossa\_.

67 'Ectopterygoid - dorsal surface ' / flat\_excavated\_by\_pneumatic\_fossa\_.

68 'Pterygoid - size of posterolateral flange anterior to basiptyergoid articulation ' / projects\_ventrolaterally\_from\_element\_unprojected,

69 'Palatine - development of jugal process ' / projected\_to\_form\_posterior\_concavity\_between\_it\_and\_main\_palatine\_body\_\_unprojected,

70 'Ectopterygoid - palatine contact ' / absent\_present,

71 'Dentary - medial curvature of symphyseal region ' / none\_low\_high,

72 'Surangular - shape of dorsal margin ' / smooth\_or\_with\_small\_coronoid\_eminence\_\_ with\_prominent\_coronoid\_eminence\_.

73 'Dentary - amount of anterior taper ' / 'anterior depth at symphysis <60% of maximum posterior depth ' '>59% ',

74 'Dentary - curvature in lateral view ' / upcurved\_straight\_downcurved,

75 'Dentary - lateral surface of posterior dentary ' / roughly\_flat\_\_with\_horizontal\_shelf\_.

76 'Dentary - length of posterodorsal process ' / absent\_ '<8% mandibular length, measured parallel to long axis of mandible ' '>8% mandibular length',

77 'Dentary - position of lateral nutrient foramina ' / on\_flat\_surface\_\_inside\_longitudinal\_groove,

78 'Surangular - shape of external mandibular fenestra border ' / straight\_to\_evenly\_convex with\_distinct\_process\_.

79 'Prearticular - concavity of anteroventral margin ' / convex\_to\_straight\_concave,

80 'Surangular - size of posterior foramen ' / absent\_small\_foramen enlarged\_fenestra,  
81 'Splenic - lateral exposure ' / absent\_or\_narrow\_\_ broad,  
82 'Coronoid - size' / large\_small absent,  
83 'Articular - dorsal surface of medial retroarticular process ' / on\_level\_with\_rest\_of\_element\_  
projected\_dorsally\_into\_distinct\_process\_,  
84 'Articular - retroarticular process elongation ' / taller\_than\_long\_to\_equidimensional\_  
longer\_than\_tall\_,  
85 'Articular - dorsal surface of glenoid ' / concave\_to\_flat\_in\_lateral\_view\_\_ convex,  
86 'Premaxilla - presence of teeth ' / toothed\_toothless,  
87 'Premaxilla - size of second premaxillary tooth compared to third and fourth premaxillary teeth ' /  
smaller\_to\_equal\_in\_size\_much\_larger\_,  
88 'Maxilla - presence of teeth ' / toothed\_toothless,  
89 'Lateral teeth - serration extent ' / present\_on\_mesial\_and\_distal\_carinae\_\_  
absent\_on\_mesial\_carinae\_but\_present\_on\_distal\_carinae\_absent\_on\_mesial\_and\_distal\_carinae\_,  
90 'Dentary - number of teeth ' / '1-11' '12-24' '25-30' '>30',  
91 'Lateral teeth - largest crown height ' / '>15% of orbit + jugal height ' '5-15%' '<5%',  
92 'Teeth - serration size ' / '<26 on distal carina ' '>25',  
93 'Teeth - distal serration shape ' / symmetrically\_rectangular\_to\_rounded\_\_ hooked\_apically,  
94 'Teeth - crown root transition ' / 'constricted mesial and/or distal edges '  
undifferentiated\_mesial\_and\_distal\_edges\_,  
95 'Dentary teeth - size of anterior teeth ' / smaller\_than\_posterior\_two\_thirds\_of\_teeth 'similar to  
posterior third of teeth, leaving teeth in the middle third the largest' larger\_than\_posterior\_two\_thirds\_of\_teeth,  
96 'Dentary teeth - difference in spacing between anterior and posterior teeth ' /  
anterior\_more\_widely\_spaced\_subequal\_spacing\_anterior\_more\_closely\_spaced\_,  
97 'Premaxilla, maxilla and dentary - medial bone between teeth ' / 'undifferentiated from  
interdental septa and/or main body of element ' forms\_distinct\_interdental\_plates\_,  
98 'Dorsal vertebrae - separation of postzygapophyses ' / joined\_into\_median\_lamina\_\_  
separated\_over\_neural\_canal\_,  
99 'Premaxillary teeth - convexity of lingual surface ' /  
subequally\_or\_more\_convex\_compared\_to\_labial\_surface much\_flatter\_to\_concave,  
100 'Cervical vertebrae - number ' / ten\_or\_less\_eleven\_or\_more\_,  
101 'Cervical vertebrae - posterior extent of epiphyses on axis ' /  
does\_not\_extend\_past\_postzygapophyses\_extend\_past\_postzygapophyses\_,  
102 'Axis - development of spinopostzygapophyseal lamina ' / 'deep, broadly connecting neural  
spine with postzygapophyses ' 'narrow to absent, so that neural spine and postzygapophyses are separated',  
103 'Cervical vertebrae - anteroposterior position of epiphyses ' /  
partly\_over\_postzygapophyseal\_facets\_anterior\_to\_postzygapophyseal\_facets,  
104 'Cervical vertebrae - posterior extent of centrum on cervicals 3-4 ' /  
completely\_under\_neural\_arch\_extending\_posteriorly\_past\_neural\_arch,  
105 'Cervical vertebrae - anteroventral surface of cervicals 9-10 ' / convex\_or\_flat\_\_  
transversely\_concave\_due\_to\_carotid\_processes\_,  
106 'Cervical vertebrae - anterior central articular surface dimensions of cervicals 3-4 ' /  
less\_than\_1.71\_times\_wider\_than\_tall\_\_ over\_1.70\_times\_wider\_than\_tall\_,  
107 'Cervical vertebrae - neural spine anteroposterior length of cervicals 3-5 ' / 'length / neural arch  
length excluding epiphyses >29%' '<30%',  
108 'Cervical vertebrae - number of pneumatic foramina in each centrum ' /  
one\_pair\_anteriorly\_located\_behind\_parapophyses\_two\_pairs,  
109 'Cervical vertebrae - convexity of anterior articular surface ' / flat\_or\_concave\_convex 'convex  
dorsoventrally, concave horizontally',  
110 'Dorsal vertebrae - convexity of anterior articular surface of centra 1-3' / flat\_or\_concave\_\_  
convex 'convex dorsoventrally, concave horizontally',  
111 'Dorsal vertebrae - hypapophysis size on dorsals 1-3 ' /  
hypapophyses\_absent\_or\_all\_less\_than\_25%\_of\_posterior\_central\_articular\_surface\_height\_  
at\_least\_one\_hypapophysis\_more\_than\_25%\_of\_posterior\_central\_articular\_surface\_height,  
112 'Dorsal vertebrae - lateral projection of parapophyses on dorsals 6-13 ' / 'parapophysis width  
measured from ventromedial corner <20% of centrum width ' '>19%',  
113 'Dorsal vertebrae - orientation of medial postzygapophyseal edge - undifferentiated from  
postzygapophyseal facet ' / undifferentiated\_from\_postzygapophyseal\_facet\_\_  
bent\_ventrally\_to\_form\_hyposphene\_which\_articulates\_with\_hypantrum\_on\_previous\_vertebra\_,  
114 'Dorsal vertebrae - extent of central pleurocoels in series' / absent\_only\_present\_anteriorly  
present\_in\_anterior\_and\_posterior\_dorsals\_,  
115 'Dorsal vertebrae - lateral extent of transverse processes on dorsals 1-4 ' /  
project\_far\_beyond\_prezygapophyses\_laterally\_'project slightly past prezygapophyses laterally (distance from midline  
to transverse process tip / distance from midline to prezygapophysis tip <180% for d1, <200% for d2, <215% for d3 and  
<250% for d4)',  
116 'Dorsal vertebrae - transverse width of neural spine distal tip ' / '<151% of minimum neural  
spine width ' '>150%',  
117 'Sacral vertebrae - number ' / less\_than\_6\_6\_7\_8\_9\_10 '11-14' '>14',  
118 'Sacral vertebrae - ventral surface of posterior centra ' / transversely\_rounded\_\_  
transversely\_flattened\_with\_median\_groove\_on\_some\_with\_median\_keel\_on\_some\_,  
119 'Sacral vertebrae - number of vertebrae with central pneumatic foramina' / none\_  
at\_least\_one\_vertebra\_but\_not\_present\_in\_all\_all,  
120 'Sacral vertebrae - convexity of posterior articular surface of last sacral centrum ' /  
concave\_to\_flat\_\_ convex,

121 'Sacral vertebrae - dorsal connection of zygapophyses ' /  
 each\_zygapophyseal\_articulation\_distinct\_from\_that\_of\_adjacent\_vertebrae\_  
 zygapophyseal\_articulations\_joined\_to\_form\_ridge,  
 122 'Caudal vertebrae - number with transverse processes of any size ' / eleven\_or\_more\_\_  
 seven\_to\_ten\_less\_than\_seven\_,  
 123 'Caudal vertebrae - transverse section of proximal centra ' / rounded\_rectangular,  
 124 'Caudal vertebrae - ventral surface of centra 1-2' / 'convexly rounded, flat or grooved '  
 with\_a\_median\_keel\_,  
 125 'Caudal vertebrae - dorsal outline of neural spines in caudals ~5-30 ' / convex\_or\_flat\_\_  
 concave\_to\_form\_accessory\_anterior\_spine\_,  
 126 'Caudal vertebrae - transverse convexity of dorsal midline in distal caudals ' /  
 narrowly\_convex\_to\_form\_neural\_spine\_\_ flat\_with\_no\_spine\_or\_groove\_\_ concave\_to\_form\_median\_groove,  
 127 'Caudal vertebrae - length of longest prezygapophyses in distal caudals ' / '<33% of centrum  
 length ' '33-100% of centrum length ' '>100% of centrum length ',  
 128 'Caudal vertebrae - number ' / '>40' '25-40' '21-24' '<21',  
 129 'Chevrons - anteroposterior length compared to dorsoventral depth ' / '<76% through chevron  
 10 ' '>75% by chevron 10 ',  
 130 'Chevrons - transverse convexity of anterior ventral edge in distal elements ' /  
 convex\_to\_straight\_\_ concave\_to\_form\_bifurcated\_anterior\_ventral\_process\_,  
 131 'Cervical ribs - length ' / greater\_than\_centrum\_\_ equal\_or\_less\_than\_centrum\_,  
 132 'Uncinate processes - ossification ' / unossified\_or\_absent\_\_ ossified,  
 133 'Sternal ribs - ossification ' / unossified\_or\_absent\_\_ ossified,  
 134 'Gaстрalia - length of lateral segments ' / shorter\_than\_medial\_segment\_\_ longer,  
 135 'Sternum - fusion of sternal plates and ventral projection of median surface ' / 'sternal plates  
 unfused, without ventral keel ' 'sternal plates fused, without ventral keel ' 'sternal plates fused, with low ventral keel'  
 'sternal plates fused, with tall ventral keel ',  
 136 'Sternum - shape of lateral edge posterior to rib articulations ' / evenly\_rounded\_or\_straight\_\_  
 distinct\_posterolateral\_process\_present\_,  
 137 'Sternum - surface of coracoid articulation ' / concave\_dorsoventrally\_forming\_groove\_\_  
 convex,  
 138 'Furcula - size of hypocleideum ' / absent\_small\_ridge\_or\_tubercle\_large\_process\_,  
 139 'Scapula - eversion of dorsal edge of acromion ' / 'absent, acromion completely dorsally to  
 medially projected ' 'present, edge of acromion laterally projected ',  
 140 'Humerus - length ' / less\_or\_equal\_to\_scapula\_\_ greater\_than\_scapula\_,  
 141 'Coracoid - transverse convexity of posterior edge (anteroposterior convexity of lateral edge in  
 Aves) ' / convex\_to\_flat\_\_ concave\_forming\_subglenoid\_fossa\_,  
 142 'Scapulocoracoid - form of contact between components ' / sutured\_or\_freely\_articulated\_fused,  
 143 'Coracoid - proximodistal elongation ' / 'proximodistal depth <91% of anteroposterior length  
 from anterior edge to glenoid (mediolateral length from medial edge to glenoid in Aves) ' '91-200%' '>200% ',  
 144 'Coracoid - angle formed in posterior (lateral in Aves) view at level of coracoid tubercle ' / '<31  
 degrees' '>30 degrees ',  
 145 'Scapula - orientation of glenoid ' / mostly\_on\_ventral\_edge\_\_ wraps\_onto\_lateral\_surface,  
 146 'Humerus - angle between distal deltopectoral crest edge at apex and posterior edge of shaft at  
 that point ' / '>85 degrees ' '46-85 degrees' '<46 degrees',  
 147 'Humerus - proximodistal placement of deltopectoral crest apex ' / '<30% of element length'  
 '30-50%' '>50%',  
 148 'Humerus - depth of deltopectoral crest ' / 'width of humerus at deepest part of deltopectoral  
 crest <301% minimal shaft depth ' '>300%',  
 149 'Humerus - lateral surface of distal deltopectoral crest ' / flat\_with\_longitudinal\_ridge,  
 150 'Ulna - length of olecranon process ' / 'proximal tip to apex of coronoid process compared to  
 length of element <15%' '15-25%' '>25%',  
 151 'Ulna - transverse convexity of distal end ' / rather\_straight\_to\_concave\_highly\_convex,  
 152 'Ulna - separation of proximal cotylae ' / single\_cotyla\_separate\_cotylae,  
 153 'Manual phalanx I-1 - shape of proximoventral edge ' / convex\_to\_flat\_\_  
 concave\_due\_to\_flexor\_tubera,  
 154 'Distal carpals I and II - form of contact' / unfused\_fused,  
 155 'Distal carpal I - form of contact with metacarpal I ' / unfused\_fused,  
 156 'Distal carpal II - form of contact with metacarpal II' / unfused\_fused,  
 157 'Distal carpals I and II - combined transverse width' / 'covers >74% of proximal transverse  
 width of metacarpals I and II ' '<75%',  
 158 'Metacarpal I - length compared to metacarpal II ' / '<50%' '50-65%' '66-80%' '>80%',  
 159 'Manual digit III - number of phalanges ' / four\_three\_two\_one\_none,  
 160 'Manual unguals - proximodistal position of flexor tubercle apex ' / '<25% down length of ungual  
 (measured on the ventral curve, excluding the tubercle) ' '>24%',  
 161 'Manual ungual I - curvature, measured as maximum distance between ventral edge and line  
 drawn between proximodorsal and distoventral tips divided by length of latter line ' / '>16%' '10-16%' '<10%',  
 162 'Manual ungual II - curvature, measured as maximum distance between ventral edge and line  
 drawn between proximodorsal and distoventral tips divided by length of latter line ' / '>16%' '10-16%' '<10%',  
 163 'Manual ungual III - curvature, measured as maximum distance between ventral edge and line  
 drawn between proximodorsal and distoventral tips divided by length of latter line ' / '>16%' '10-16%' '<10%',  
 164 'Manual unguals - depth of flexor tubercles ' / '>32% of articular facet height ' '<33%',  
 165 'Manual ungual I - size compared to manual ungual II ' / smaller\_\_  
 equal\_to\_three\_times\_larger\_\_ over\_three\_times\_larger\_,  
 166 'Manual ungual I - shape of proximodorsal margin ' / smoothly\_convex\_\_  
 with\_lip\_rising\_dorsally,



167 'Manual ungual II - shape of proximodorsal margin ' / smoothly\_convex\_\_  
with\_lip\_rising\_dorsally\_,

168 'Manual ungual III - shape of proximodorsal margin ' / smoothly\_convex\_\_  
with\_lip\_rising\_dorsally\_,

169 'Ilium - ventral expansion of preacetabular process ' / 'expansion (measured as distance  
preacetabular tip extends ventrally past highest point at ventral edge of preacetabular process / height of preacetabular  
process at that point) >18% ' <19% but present' absent,

170 'Ilium - length of preacetabular process, measured from notch below process ' / '<50% of  
postacetabular length, measured from posterior edge of ischial peduncle base' '50-120%' '>120%',

171 'Ilium - angle of anterior edge of preacetabular process ' /  
less\_than\_11\_degrees\_posteroventrally\_ '10-70 degrees posteroventrally ' 'more than 70 degrees posteroventrally,  
often being the anteroventral edge of a round process',

172 'Ilium - dorsal margin of acetabulum in dorsal/ventral view ' /  
markedly\_convex\_due\_to\_well\_developed\_supracetabular\_crest\_  
slightly\_convex\_due\_to\_poorly\_developed\_supracetabular\_crest\_  
straight\_or\_concave\_due\_to\_absence\_of\_supracetabular\_crest\_,

173 'Ilium - lateral surface at dorsal edge posterodorsal to acetabulum ' / flat\_  
developed\_into\_supratrochanteric\_process\_,

174 'Ilium - shape of postacetabular process ' / quadrangular\_posteriorly\_\_triangular\_posteriorly,  
175 'Ilium - dorsal postacetabular edge angled posterolaterally' / '<11 degrees between right and  
left ilia ' '>10 degrees',

176 'Ilium - depth of brevis fossa ' / deep\_shallow\_absent,  
177 'Ilium - lateral projection of antitrochanter ' /  
undifferentiated\_from\_supracetabular\_area\_and\_postacetabular\_process\_projected\_further\_laterally\_,

178 'Ilium - posterior extent of m. cuppedicus fossa over pubic peduncle in lateral view ' /  
over\_at\_least\_half\_of\_peduncle\_\_over\_less\_than\_half\_,

179 'Ilium - ventral surface on preacetabular process for m. puboischiofemoralis internus  
(iliofemoralis internus and ilioprochantericus cranialis in Aves) /  
forms\_cuppedicus\_fossa\_which\_is\_overhung\_laterally\_\_  
forms\_flat\_surface\_or\_laterally\_angled\_fossa\_which\_is\_not\_overhung\_laterally\_  
muscles\_attach\_to\_undifferentiated\_blade\_of\_ilium\_,

180 'Ischium - proximodorsal edge ' / unprojected\_  
projected\_into\_low\_process\_separated\_from\_ilial\_peduncle\_by\_shallow\_concavity  
projected\_into\_tall\_process\_and\_separated\_from\_ilial\_peduncle\_by\_notch,

181 'Ischium - distal curvature ' / curved\_dorsally\_straight\_curved\_ventrally,  
182 'Ischium - dorsoventral convexity of lateral surface ' / concave\_flat\_or\_convexly\_rounded  
ridged,

183 'Ischium - proximodistal position of obturator process apex ' / '<34% down shaft' '34-66%'  
'>66%',

184 'Ischium - contact between obturator process and pubis ' / absent\_present,  
185 'Ischium - development of ischial apron' /  
notch\_proximally\_between\_obturator\_process\_and\_pubic\_peduncle\_  
notch\_enclosed\_fully\_forming\_obturator\_foramen\_no\_ventral\_projection\_or\_foramen\_in\_ischium\_ventral\_margin,

186 'Ischium - ventral edge of pubic peduncle ' / flat\_projected\_as\_obturator\_tuber\_,  
187 'Ischium - length compared to pubis ' / '>100%' '66-100%' '50-65%' '<50%',  
188 'Ischium - form of median contact ' / fused\_unfused\_but\_contacting\_no\_contact,  
189 'Ischium - dorsoventral expansion of distal end ' / wider\_than\_shaft\_  
narrower\_or\_equal\_to\_shaft,

190 'Pubis - orientation of proximal half in lateral view ' / '<67 degrees from anteriorly horizontal'  
'67-120 degrees' '121-150 degrees' '>150 degrees',

191 'Pubis - anteroposterior length of anterior boot, measured as flare from prior curvature of pubis'  
' '>3% of pubic length ' '<4%',

192 'Pubis - anteroposterior length of posterior boot, measured as distal depth of pubis excluding  
anterior boot ' / '>29% of pubic length ' '15-29%' '6-14%' '<6%',

193 'Pubis - anteroposterior position of apron ' / in\_middle\_or\_at\_posterior\_edge\_of\_shaft\_\_  
at\_anterior\_edge\_of\_shaft,

194 'Pubis - curvature in lateral view ' / anteriorly\_concave\_\_straight\_or\_sigmoid  
posteriorly\_concave,

195 'Pubis - proximal extent of symphysis, measured to median edge ' / '>41% of pubic length '  
'<42% but present' absent,

196 'Femur - medial surface of head ' / flat\_to\_convex\_\_concave\_to\_form\_capital\_ligament\_fossa,  
197 'Femur - separation of anterior and greater trochanters ' / 'depth of the intertrochanteric notch  
(from the tip of the anterior trochanter) >65% the minimum anteroposterior diameter of the femur ' '<66% but still  
present' 'absent, trochanters fused forming trochanteric crest',

198 'Femur - section of anterior trochanter in proximal view ' / 'anteroposteriorly elongate, forming  
aliform trochanter' equal\_to\_transversely\_elongate\_,

199 'Femur - posterolateral surface at proximal end ' / flat\_'posterior trochanter for insertion of m.  
ischiotrochantericus (m. ischiofemoralis in Aves) present but separate from more anterior m. iliofemoralis externus  
insertion (trochanteric shelf homolog)' posterior\_trochanter\_present\_and\_congruent\_with\_trochanteric\_shelf,

200 'Femur - posterior surface of midshaft ' / 'with convexity for insertion of M. caudofemoralis  
longus, forming fourth trochanter' flat\_or\_depressed\_,

201 'Femur - convexity of anterior edge of anterior trochanter in lateral view ' /  
convex\_or\_straight\_\_concave, forming accessory trochanter distal to it',

202 'Femur - anteromedial surface of distal end ' / uniformly\_convex\_transversely  
with\_proximodistal\_ridge\_forming\_medial\_epicondyle,

distally\_closed, 203 'Femur - distal enclosure of popliteal fossa between distal condyles ' / distally\_open\_\_\_  
 204 'Fibula - contact with proximal tarsals ' / contact\_present\_contact\_absent,  
 deep\_concavity\_, 205 'Fibula - concavity of proximomedial surface ' / flat\_to\_convex\_shallow\_concavity\_  
 206 'Proximal tarsals - depth of concavity between medial and lateral condyles in distal view ' /  
 '<20% of anteroposterior depth of deepest condyle '>19%',  
 with\_proximodistal\_ridge\_forming\_medial\_cnemial\_crest\_, 207 'Tibia - anteromedial surface of proximal portion ' / flat\_  
 apex' / '>84% of astragalocalcaneal width '<85%',  
 208 'Astragalus - height of ascending process, from distal tibiotarsal edge to ascending process  
 209 'Astragalus - mediolateral width of ascending process ' / 'measured halfway up, <58% width of  
 astragalocalcaneum '>57%',  
 'markedly concave, at least comparable in depth to Shuvuuia and Mononykus',  
 separated\_by\_groove, 210 'Astragalus - concavity of medial edge of ascending process ' / convex\_to\_slightly\_concave  
 211 'Astragalus - confluence of condyles and ascending process ' / confluent\_  
 flat\_compared\_to\_rest\_of\_ascending\_process\_distinctly\_depressed\_as\_a\_fossa\_, 212 'Astragalus - convexity of anterior surface at base of ascending process ' /  
 213 'Astragalus - form of contact with tibia ' / unfused\_fused,  
 214 'Astragalus - form of contact with calcaneum ' / unfused\_fused,  
 215 'Distal tarsals - form of contact with metatarsals ' / unfused\_fused,  
 'fused proximally and distally, but not distal to distal vascular foramen between III and IV '  
 fusion\_encloses\_distal\_vascular\_foramen, 216 'Metatarsals II-IV - extent of fusion ' / unfused\_'at least two fused proximally, but not distally'  
 217 'Metatarsal II - depth of distal articular groove ' / absent\_or\_shallow\_\_\_ deep,  
 218 'Metatarsal III - depth of distal articular groove ' / absent\_or\_shallow\_\_\_ deep,  
 219 'Metatarsal III - proximal transverse constriction ' /  
 anterior\_exposure\_wider\_or\_subequal\_to\_metatarsals\_II\_and\_IV\_ 'anterior exposure significantly narrower than II and  
 IV but still present at proximal end, subarctometatarsal ' 'hidden anteriorly at proximal end by contact between II and IV  
 but still exposed on proximal surface, arctometatarsal ' 'does not extend to proximal surface, hyperarctometatarsal ',  
 220 'Metatarsal IV - transverse width at midshaft ' / '<117% of depth at midshaft '>116% of depth',  
 221 'Metatarsal I - presence ' / present\_absent,  
 222 'Metatarsal I - proximodistal position ' / 'distance between distal ends of metatarsals I and II  
 when articulated >30% length of metatarsal II ' '18-30%' '6-18%' '<6%',  
 223 'Metatarsal I - proximal extent ' / ends\_distal\_to\_tarsus\_\_\_ extends\_to\_contact\_tarsus\_  
 224 'Pedal ungual II - length on straight line compared to ungual III ' / '<141%' '>140%',  
 225 'Pedal ungual II - curvature ' / 'depth of the dorsal arc <30% of ungual length (measured in a  
 straight line from the proximodorsal tip to the distal tip) '>29%',  
 '>166%',  
 226 'Metatarsal IV - transverse width at midshaft compared to metatarsal II ' / '<66%' '66-165%'  
 height ' '<40%',  
 227 'Skull - depth of snout ' / 'height of preorbital snout one fourth from tip >39% of orbit+jugal  
 degrees ', 228 'Premaxilla - angle between anterior subnarial and ventral margins ' / '>34 degrees ' '<35  
 '<50',  
 229 'Premaxilla - subnarial height compared to alveolar length ' / '>180%' '101-180%' '50-100%'  
 similar\_to\_that\_between\_teeth\_in\_each\_element\_'greater, forming diastema between elements ',  
 230 'Premaxilla and maxilla - space between toothrows of each element ' /  
 '<36%',  
 231 'Maxilla- shape of promaxillary fenestra ' / 'minimum diameter >35% of maximum diameter '  
 232 'Nasal - convexity of dorsal edge in lateral view' / convex\_or\_straight\_\_\_ concave,  
 233 'External naris - length ' / 'longest axis <49% of orbit+jugal height ' '49-80%' '>80%',  
 234 'Postorbital - length of posterior process ' / shorter\_or\_equal\_to\_ventral\_process\_\_\_ longer,  
 235 'Frontal - dorsal surface of supratemporal fossa ' / flat\_with\_pit,  
 236 'Parietal - minimum width ' / less\_or\_equal\_to\_minimum\_frontal\_transverse\_width\_\_\_ more,  
 237 'Parietal - dorsal outline ' / concave\_to\_straight convex,  
 238 'Quadrate - proximodistal position of pterygoid process apex ' / '>45%' '<46%',  
 239 'Basioccipital - shape of notch between basal tubera ' / rounded\_angled,  
 excavated\_by\_fossa\_, 240 'Laterosphenoid - lateral surface dorsal to exit for oculomotor (III) nerve' / flat\_to\_convex  
 241 'Dentary - posterior depth compared to length ' / '<15%' '15-50%' '>50%',  
 242 'Teeth - DSD' / '<1.19' '>1.2',  
 243 'Dorsal vertebrae - length of column ' / '>119% of femoral length ' '<120%',  
 244 'Dorsal vertebrae - centrum proportions of dorsals 6-13 ' / 'length <83% of posterior height '  
 '83-130%' '130-200%' '>200%',  
 245 'Dorsal vertebrae - anteroposterior expansion of neural spine apex in dorsals 6-13 ' / '<116% of  
 minimum anteroposterior spine length '>115%',  
 246 'Sacral vertebrae - transverse width of ancestral neotheropod sacral centra 1 and 2 ' / '>69% of  
 ancestral sacral centrum 3 width '<70%',  
 tapered\_subequal\_expanded, 247 'Caudal vertebrae - distal anteroposterior width of transverse processes on caudals 1-4 ' /  
 '>200% longer',  
 248 'Caudal vertebrae - length of caudals 10-15 ' / shorter\_than\_caudal\_1 '100-200% longer'  
 249 'Sternal ribs - number which contact dorsal ribs ' / none\_to\_three\_\_\_ at\_least\_four,

250 'Furcula - size ' / 'length of arm from omal tip to base excluding hypocleidium <36% of scapular length '>35%',  
 251 'Coracoid - surface just distal to coracoid tuber ' / solid\_pierced\_by\_supracoracoid\_fenestra,  
 252 'Scapula - contact between acromion and coracoid ' / present\_to\_near\_anterior\_tip\_\_ 'absent, scapula-coracoid contact limited to short area near glenoid ',  
 253 'Scapulocoracoid - length of glenoid edge formed by scapula, with glenoid edge of each bone simplified to a straight line ' / '<160% the length of glenoid edge formed by coracoid '>159%',  
 254 'Humerus - length compared to femur ' / '<38% '38-69% '70-100%'>100%',  
 255 'Femur - distal extent of lateral condyle past medial condyle ' / '<11% of distal femur width '>10% of distal femur width ',  
 256 'Radius - midshaft anteroposterior diameter ' / '>71% of ulnar midshaft anteroposterior diameter '51-71%'<51%',  
 257 'Manual phalanx I-1 - length compared to metacarpal II ' / '<70% '70-100%'>100%',  
 258 'Manual phalanx III-2 - length compared to III-1 ' / '>105% '60-105%'<60%',  
 259 'Manual phalanx III-2 - proximoventral heel, prominence measured as angle between dorsal and ventral edges of element ' / '<11 degrees '>10 degrees',  
 260 'Manual phalanx III-3 - dorsoventral depth of shaft just proximal to distal condyles ' / similar\_to\_rest\_of\_shaft\_\_ much\_shallower\_than\_rest\_of\_shaft\_,  
 261 'Ilium - length ' / '>63% of femoral length ''<64%',  
 262 'Ilium - anteroposterior diameter of external acetabulum (measured between lateral surfaces of peduncles, excluding any medial walls or angled anterior and posterior acetabular surfaces) ' / '>18% of ilial length ''<19%',  
 263 'Ilium - angle main axis of pubic peduncle projects, compared to line drawn between bases of peduncles' / anterior\_to\_vertical\_posterior,  
 264 'Pubis - lateral surface of mid shaft ' / smooth\_with\_lateral\_projection\_,  
 265 'Ischium - dorsal process at midshaft ' / absent\_present,  
 266 'Tibia - surface just posterior to fibular crest ' / flat\_longitudinally\_grooved\_,  
 267 'Pedal phalanx II-2 - length compared to II-1 ' / '<60% '60-82% '83-100%'>100%',  
 268 'Pedal phalanx II-2 - height of distal condyles compared to length (excluding posterior lips) ' / '<61% '>60%',  
 269 'Metatarsal IV - convexity of posterior surface in section ' / flat\_or\_broadly\_convex\_\_ sharply\_keeled,  
 270 'Pedal phalanx IV-4 - length compared to IV-3 ' / '<101% '>100%',  
 271 'Metatarsal V - length compared to metatarsal IV ' / '<41% '>40%',  
 272 'Pedal ungual I - depth of the dorsal arc compared to ungual length (measured in a straight line from the proximodorsal tip to the distal tip) ' / '<23% '>22%',  
 273 'Pedal unguals III and IV - depth of the dorsal arc compared to ungual length (measured in a straight line from the proximodorsal tip to the distal tip) ' / '<16% '16-21%'>21%',  
 274 'Pedal unguals - cross section of III and IV' / 'expanded ventrally, triangular ' subequal\_in\_transverse\_width\_dorsally\_and\_ventrally,  
 275 'Feathers - presence' / 'absent, skin naked or scaled ' 'present, unbranched or branched filamentous integument',  
 276 'Feathers - arrangement of barbs ' / unbranched\_or\_with\_basally\_radiating\_barbs\_\_ with\_barbs\_arranged\_in\_a\_vane\_,  
 277 'Feathers - length of feathers along metatarsus ' / absent\_to\_comparable\_to\_body\_feathers\_\_ elongated,  
 278 'Pubis - angle of posterior pubic boot to shaft ' / '>79 degrees ''<80 degrees',  
 279 'Chevrons - transverse convexity of posterior ventral edge in distal elements' / convex\_to\_straight\_\_ concave\_to\_form\_bifurcated\_posterior\_ventral\_process\_,  
 280 'Metacarpal I - proportions in dorsal/ventral view ' / longer\_than\_wide\_wider\_than\_long,  
 281 'Manual phalanx I-1 - minimum transverse width ' / less\_than\_or\_equal\_to\_minimum\_transverse\_width\_of\_radius\_greater,  
 282 'Angular - posterior extent at ventral mandibular edge ' / 'extends to reach >94% down mandibular length from symphysis ''<95%',  
 283 'Surangular - dorsolateral surface just anterior to glenoid ' / unprojected\_dorsally\_projected\_as\_everted\_ridge,  
 284 'Metacarpal I - convexity of distal end in dorsal view ' / deeply\_concave\_due\_to\_well\_developed\_ginglymus\_slightly\_concave\_flat\_to\_convex,  
 285 'Metacarpal II - convexity of distal end in dorsal view ' / concave\_flat\_to\_convex,  
 286 'Dentary - convexity of anterodorsal edge ' / concave\_to\_rounldy\_convex\_\_ with\_abrupt\_ventral\_deflection,  
 287 'Quadrate - lateral exposure of head ' / covered\_by\_squamosal\_\_ visible\_laterally\_,  
 288 'Ilium - ventral projection of medial brevis ridge ' / at\_least\_partly\_ventral\_to\_lateral\_brevis\_fossa\_edge\_\_ reduced\_to\_not\_be\_visible\_laterally\_,  
 289 'Femur - development of insertion for M. iliofemoralis externus on proximolateral surface' / unprojected\_to\_low\_mound\_\_ forms\_longitudinal\_ridge\_forms\_trochanteric\_shelf,  
 290 'Dentary teeth - extent ' / over\_most\_of\_alveolar\_edge\_\_ restricted\_to\_anterior\_tip\_absent,  
 291 'Coracoid - depth of subglenoid notch ' / 'anteroposterior length from anterior coracoid edge to posterior tip of coracoid glenoid (mediolateral length from medial coracoid edge to lateral tip of coracoid glenoid in Aves) <106% of depth from anterior coracoid edge to subglenoid notch ''>105%',  
 292 'Articular - curvature of retroarticular process ' / straight\_or\_decurved\_\_ upcurved,  
 293 'Scapula - lateral surface dorsal to glenoid ' / flat\_\_ with\_dorsoventral\_ridge\_forming\_supraglenoid\_buttress,  
 294 'Basioccipital - transverse width across basal tubera ' / '>164% of occipital condyle transverse width ''<165%',  
 295 'Metatarsal II - length' / '<98% of metatarsal III ''>97%',

296 'Basioccipital - posterior surface ventrolateral to occipital condyle ' / flat\_ excavated\_by\_subcondylar\_recess,

297 'Humerus - transverse width of entepicondyle ' / narrow\_or\_absent\_ 'wide, >15% of distal humeral width',

298 'Ilium - convexity of ischial peduncle articular surface ' / concave\_to\_flat\_\_ 'convex, articulates with socket on ischium',

299 'Teeth - labiolingual compression of roots of lateral teeth ' / 'labiolingual width <70% FABL ' '>69%',

300 'Ilium - lateral deflection of preacetabular process ' / lateral\_edge\_of\_preacetabular\_process\_less\_than\_60\_degrees\_from\_dorsal\_postacetabular\_margin\_\_ '60-90 degrees' more\_than\_90\_degrees,

301 'Teeth - recurvature ' / significant\_slight\_or\_absent,

302 'Dentary and maxilla - method of tooth implantation ' / all\_in\_distinct\_sockets\_\_ some\_in\_confluent\_groove,

303 'Pubis - extent of symphyseal contact of aprons ' / continuous\_interpubic\_fenestra,

304 'Ilium - convexity of dorsal edge of postacetabular process ' / convex\_or\_straight\_concave,

305 'Ilium - posterolateral edge of postacetabular process in dorsal view ' / ventral\_edge\_does\_not\_project\_laterally\_compared\_to\_dorsal\_edge\_ ventral\_edge\_has\_lateral\_projection\_at\_posterior\_end\_of\_iliuim,

306 'Pedal phalanx II-2 - length of proximoverventral heel compared to height of distal condyles ' / absent 'present but <44% ' '>43%',

307 'Ischium - obturator notch distal to process ' / present\_absent,

308 'Ischium - angle between edges of obturator process ' / '>29 degrees ' '<30 degrees',

309 'Metatarsals II and III - topology of dorsal surface of shaft ' / no\_tubercle\_developed\_on\_either\_metatarsal\_ tubercle\_for\_insertion\_of\_m\_tibialis\_cranialis\_on\_center\_or\_medial\_edge\_of\_metatarsal\_II tubercle\_for\_insertion\_of\_m\_tibialis\_cranialis\_on\_lateral\_edge\_of\_metatarsal\_II\_or\_on\_metatarsal\_III,

310 'Maxilla - concavity of anterodorsal margin at base of dorsal process ' / 'depth of concavity <4% of orbit+jugal height ' '>3%',

311 'Maxilla - length of anterior ramus, measured from point of maximum anterodorsal concavity ' / '<150% of maxillary height at that point ' '>149%',

312 'Nasal - extent of antorbital fossa on lateral surface ' / absent\_present,

313 'External mandibular fenestra - length compared to mandibular length ' / '>18% ' '12-18% ' '1-11%' absent,

314 'Anterior teeth - texture of carinae ' / serrated\_ unserrated,

315 'Maxilla - posterior extent of teeth ' / posterior\_to\_anterior\_orbital\_margin\_\_ restricted\_anterior\_to\_anterior\_orbital\_margin\_but\_extend\_over\_half\_of\_maxillary\_length restricted\_to\_less\_than\_anterior\_half\_of\_maxilla\_,

316 'Metacarpal IV - presence' / present\_absent,

317 'Ilium - ventral extent of pubic peduncle compared to ischial peduncle ' / equal\_or\_less\_ greater,

318 'Pubis - extent of puboischiadic plate proximally ' / obturator\_foramen\_pierces\_plate\_\_ obturator\_notch\_formed\_when\_foramen\_opens\_ventrally\_ obturator\_notch\_reduced\_so\_that\_posterior\_edge\_of\_ischial\_peduncle\_does\_not\_project\_distally,

319 'Femur - proximal extent of anterior trochanter ' / completely\_distal\_to\_head\_\_ extends\_to\_lower\_half\_of\_head\_extends\_at\_least\_to\_upper\_half\_of\_head\_,

320 'Astragalus - anteroposterior depth of ascending process' / deep\_and\_blocky\_ shallow\_and\_laminar,

321 'Maxilla - dorsoventral position of maxillary fenestra ' / 'distance from ventral antorbital fossa rim <11% of orbit+jugal height ' '>10%',

322 'Maxilla - depth of posterior process ' / 'minimal depth <16% orbit+jugal height ' '>15%',

323 'Maxilla - convexity of lateral surface surrounding maxillary fenestra ' / flat\_ 'concave, forming fossa ',

324 'Maxilla - size of external portion of dorsal process' / robust\_reduced absent,

325 'Maxilla - height of antorbital fossa portion of dorsal process ' / broadly\_contacts\_external\_portion\_of\_dorsal\_process\_\_ separated\_from\_external\_portion\_,

326 'Nasal - contact with antorbital fossa ' / absent\_ present\_but\_does\_not\_contact\_antorbital\_fenestra present\_and\_contacts\_antorbital\_fenestra\_,

327 'Premaxilla - contact with antorbital fossa ' / absent\_present,

328 'Jugal - contact with antorbital fenestra ' / absent\_present,

329 'Splénial - concavity of posterior margin ' / convex\_to\_slightly\_concave\_\_ strongly\_concave,

330 'Premaxillary teeth - height of first tooth' / 'less than twice height of premaxillary teeth 2-4 ' 'more than twice height of premaxillary teeth 2-4 ',

331 'Postorbital - angle of anterior process ' / '<96 degrees from long axis of ventral process ' '>95 degrees',

332 'Jugal - lateral exposure of posterior process ' / much\_of\_process\_exposed\_\_ most\_of\_process\_hidden\_by\_quadratejugal\_,

333 'Frontal - shape of suture with nasal ' / roughly\_straight\_or\_curved\_\_ 'W-shaped',

334 'Cervical vertebrae - height of neural spines ' / taller\_than\_anteroposteriorly\_long\_ lower\_than\_anteroposteriorly\_long\_,

335 'Caudal vertebrae - fusion of distal caudals ' / absent\_ 'present, fused into pygostyle',

336 'Coracoid - anterior projection of anterodistal margin (medial projection of mediodistal margin in Aves) ' / posterior\_to\_or\_on\_level\_with\_anterior\_margin\_of\_scapulocoracoid\_boundary\_ 'anterior to anterior margin (medial to medial margin in Aves) of scapulocoracoid boundary ',

337 'Skull - length compared to femur ' / '>125% ' '80-125% ' '61-79% ' '<61%',

338 'External naris - dorsoventral placement' / 'distance between ventral edge and alveolar edge <51% of orbit+jugal height' '>50%',

339 'Maxilla - posterior extent of medial wall of antorbital fossa' / 'length of antorbital fossa anterior to antorbital fenestra / antorbital fenestra length <46%' '>45%',

340 'Maxilla - elongation of maxillary fenestra' / 'height >50% of length' '25-50%' '<25%',

341 'Nasals - median contact' / 'sutured or non-contacting' 'fused',

342 'Nasal - surface texture' / 'smooth\_rugose',

343 'Jugal - minimum suborbital height' / '>30% of orbital height' '20-30%' '<20%',

344 'Nasal - length compared to frontal' / 'longer\_or\_equal\_shorter',

345 'Skull - ventral deflection of snout' / 'angle between maxilla and jugal+quadratojugal ventral margins <30 degrees' '>29 degrees',

346 'Maxilla - length of ventral margin' / '>125% of orbit+jugal height' '<126%',

347 'Frontal - level of lateral edge of dorsal surface' / 'equal\_or\_depressed\_compared\_to\_rest\_of\_frontal\_\_raised\_rim',

348 'Parietal - length compared to frontal' / 'shorter\_longer',

349 'Laterotemporal fenestra - greatest anteroposterior length' / '>30% of orbit+jugal height' '<31%',

350 'Exoccipital and basioccipital - transverse width of foramen magnum' / '<101% of occipital condylar width' '>100%',

351 'Dentary - depth of Meckelian groove' / 'deep\_shallow',

352 'Dentary - posterior extent of ventral dentary' / 'ends\_prior\_to\_or\_partly\_overlapping\_external\_mandibular\_fenestra\_\_extends\_past\_external\_mandibular\_fenestra\_\_',

353 'Surangular - lateral surface ventral to glenoid' / 'flat\_with\_horizontal\_ridge\_',

354 'Premaxillary teeth - height of longest compared to longest maxillary tooth' / '>70%' '<71%',

355 'Dentary teeth - presence at tip of dentary' / 'present\_absent\_for\_space\_of\_more\_than\_two\_FABs\_from\_dentary\_tip',

356 'Cervical vertebrae - elongation' / 'centrum\_length\_less\_than\_centrum\_height\_equal\_to\_twice\_as\_long\_length\_more\_than\_twice\_height\_',

357 'Dorsal vertebrae - height of neural spines of posterior dorsals (6-13)' / '>149% taller than long' '>75% of posterior central height' '<76%',

358 'Dorsal vertebrae - posterior extent of postzygapophyses on mid and posterior dorsals (4-13)' / 'end\_above\_centrum\_\_extend\_posterior\_to\_centrum\_',

359 'Chevrons - length of proximal chevrons compared to caudal centrum length' / '>149%' '<150%',

360 'Furcula - interclavicular angle, measured from center of median to tips of arms' / '>69 degrees' '<70 degrees',

361 'Scapula - angle of posterior edge of acromion' / '>80 degrees compared to dorsal edge of shaft just proximal to it' '80-20 degrees' '<20 degrees',

362 'Scapula - angle of anterior edge of acromion' / '<106 degrees compared to dorsal edge of shaft just posterior to it' '>105 degrees',

363 'Scapulocoracoid - shape of anterior edge at suture' / 'notched\_smooth',

364 'Scapula - expansion of posterior end' / '>184% of minimum shaft width' '<185%' 'tapered',

365 'Coracoid - position of coracoid tuber' / 'distal\_to\_scapular\_articulation\_\_proximal\_to\_scapular\_articulation, forming acrocoracoid process',

366 'Humerus - minimum width in anterior view compared to length' / '>12%' '<13%',

367 'Ulna - shape of posterior margin' / 'straight, sigmoid or concave' 'convex',

368 'Distal carpals I and II - shape of combined proximal surface' / 'flat\_or\_irregular\_\_strongly\_and\_smoothly\_convex\_',

369 'Metacarpal I - height of medial condyle ventrally compared to lateral condyle' / 'higher\_lower',

370 'Metacarpal II - medial expansion of proximal end' / 'much greater than distal width, >119%' 'subequal or less than distal width, <120%',

371 'Metacarpal III - length compared to metacarpal II' / '>79%' '<80%',

372 'Metacarpal III - distal extent of contact with metacarpal II' / 'extensive\_intermetacarpal\_space\_metacarpals\_in\_contact\_for\_almost\_all\_of\_their\_length\_',

373 'Metacarpal III - position of proximal end' / 'mostly\_lateral\_to\_metacarpal\_II\_\_mostly\_ventral\_to\_metacarpal\_II\_',

374 'Manual phalanx II-2 - length compared to II-1' / '<101%' '101-119%' '120-200%' '>200%',

375 'Manual phalanx II-1 - expansion of lateral edge' / 'fully\_concave\_\_with\_low\_convexity\_developed\_on\_at\_least\_portion\_of\_shaft, maximum shaft width <161% of minimum width of metacarpal II' 'with deep convexity, >160% of minimum width of metacarpal II',

376 'Manual digit II - length of II-1 and II-2 compared to metacarpal II' / '>100%' '<101%',

377 'Manual phalanx I-1 - ventral curvature' / 'straight\_bowed',

378 'Manual ungual I - dorsal projection of dorsal curve' / 'with articular surface oriented vertically, dorsal edge of at least mid portion of ungual does not project dorsally over the level of the proximodorsal ungual corner' 'dorsal\_edge\_of\_at\_least\_mid\_portion\_of\_ungual\_does\_project\_dorsally\_over\_the\_level\_of\_the\_proximodorsal\_ungual\_corner\_',

379 'Manual ungual II - dorsal projection of dorsal curve' / 'with articular surface oriented vertically, dorsal edge of at least mid portion of ungual does not project dorsally over the level of the proximodorsal ungual corner' 'dorsal\_edge\_of\_at\_least\_mid\_portion\_of\_ungual\_does\_project\_dorsally\_over\_the\_level\_of\_the\_proximodorsal\_ungual\_corner\_',

380 'Manual phalanx III-3 - length compared to combined lengths of III-1 and III-2' / '<93%' '93-109%' '>109%',

381 'Ilium - height of preacetabular process, dorsal extent over line drawn between bases of peduncles, compared to height at base of postacetabular process' / '<90%' '90-150%' '>150%',

382 'Ischium - minimum anteroposterior depth of shaft distal to obturator process compared to pubic shaft' / '<80%' '80-130%' '>130%',

383 'Tibia - length compared to femur ' / shorter\_or\_equal\_longer,

384 'Tibia - anterior constriction at base of lateral condyle in proximal view ' / lateral\_condyle\_does\_not\_laterally\_overlap\_incisura\_tibialis\_overlap\_present,

385 'Metatarsus - length compared to femur ' / '>49%' '37-49%' '<37%',

386 'Metatarsal II - depth at midshaft ' / less\_or\_equal\_to\_transverse\_width\_at\_midshaft\_greater\_than\_transverse\_thickness\_,

387 'Metatarsus - distal extent of metatarsal II-IV contacts ' / shafts\_separated\_\_ shafts\_appressed,

388 'Metatarsus - minimum transverse width distally compared to proximal width ' / '>59%' '<60%',

389 'Metatarsal I - torsion ' / absent\_present, so that hallux faces medially or posteriorly ',

390 'Pedal ungual I - length on straight line compared to ungual III ' / '<90%' '>89%',

391 'Manual ungual III - length on straight line compared to ungual II ' / '<96%' '>95%',

392 'Metatarsus - transverse slenderness at midshaft ' / '>50% of length ' '30-50%' '13-29%' '<13%',

393 'Ilium - anteroposterior length of pubic peduncle, measured halfway down ' / over\_twice\_as\_long\_as\_ischial\_peduncle\_measured\_halfway\_down 'less than twice, but still longer than ischial peduncle ' equal\_or\_shorter,

394 'Pedal phalanx III-1 - slenderness ' / 'length >139% transverse width ' '<140%',

395 'Humerus - transverse width of distal end ' / '<200% minimum shaft width ' '200-269%' '>269%',

396 'Humerus - transverse extent of ectepicondyle ' / '<20% of distal humeral width ' '>19%',

397 'Metatarsal I - transverse width of distal condyle ' / '<81% of transverse width of distal condyle of metatarsal III ' '>80%',

398 'Metacarpal II - length compared to humerus ' / '>32%' '<33%',

399 'Jugal - dorsoventral expansion of anterior process ' / 'expansion dorsal to ventral orbit margin <6% of orbit+jugal height' '>5%',

400 'Chevrons - anteroventral process on distal chevrons ' / absent\_present,

401 'Metacarpal III - depth of distal articular groove ' / absent\_present,

402 'Scapula - dorsoventral depth of acromion ' / '>20% of total scapular depth ' '<21%',

403 'Metatarsus - medial extent of metatarsal IV posterior to III ' / 'extensive, often leading to L-shaped metatarsal III ' slight\_to\_absent,

404 'Nasals - transverse convexity of dorsal surface ' / concave\_to\_slightly\_convex\_\_ 'highly convex, forming median crest',

405 'Ectopterygoid - anteroposterior position ' / posterior\_to\_palatine\_\_ lateral\_to\_palatine\_,

406 'Pterygoid - orientation of palatal process ' / 'within 20 degrees of ventral jugal edge, palatal process completely dorsal to ventral margin of jugal ' 'projects strongly downward (>20 degrees), palatal process mostly ventral to jugal',

407 'Articular - contact with surangular ' / sutured\_fused,

408 'Cervical ribs - contact with vertebrae ' / mobile\_or\_sutured\_fused,

409 'Caudal vertebrae - pneumaticity of caudal centra 1-5 ' / absent\_pleurocoels\_present,

410 'External mandibular fenestra - anteroposterior placement ' / 'length of mandible posterior to fenestra <140% orbit+jugal height ' '>139%',

411 'Manual ungual II - presence ' / present\_absent,

412 'Ilium - convexity of anterodorsal edge ' / convex\_or\_flat\_with\_concavity,

413 'Basioccipital - basal tubera size' / present\_absent,

414 'Postorbital - length of anterior process ' / shorter\_than\_ventral\_process\_\_ equal\_or\_longer\_than\_ventral\_process\_but\_without\_thin\_extension\_along\_orbit 'longer than ventral process, with thin extension along orbit ',

415 'Postorbital - angle between ventral and posterior processes (measured with vertex equidistant between orbit, supratemporal and laterotemporal fenestrae, through tips of processes) ' / '<120 degrees ' '>119 degrees ',

416 'Scapula - medial curvature' / 'present, anterior end placed medially to blade ' absent,

417 'Scapula - sectional shape of posterior half ' / thin\_blade\_\_ 'ventrally thick, drop-shaped ',

418 'Coracoid - convexity of medial (posterior in Aves) surface ' / flat\_with\_fossa,

419 'Ulna - height of coronoid process ' / prominent\_low\_or\_absent,

420 'Ulna - height of proximomedial process ' / low\_or\_absent\_prominent,

421 'Ulna - anterior surface of proximal third ' / smooth\_with\_longitudinal\_ridge\_,

422 'Ulna - proximal extent of distal articular surface up posterolateral side ' / slight\_\_ over\_half\_of\_ulnar\_depth\_,

423 'Ulna - position of thickest portion of distal end ' / near\_medial\_margin\_\_ near\_middle\_or\_lateral\_margin,

424 'Ulna - anterolateral surface distally ' / convex\_to\_shallowly\_depressed\_\_ well\_defined\_radial\_sulcus\_extending\_to\_distal\_articulation\_,

425 'Ulna - proportions of distal end ' / transversely\_compressed\_to\_equilateral\_\_ 'transverse width greater, but less than 201% ' transverse\_width\_greater\_than\_200%\_,

426 'Radius - dorsal projection of distal end ' / absent\_present, forming flange',

427 'Radiale - size' / '<90% of distal ulnar depth ' '>89%',

428 'Ulnare - convexity of distal edge' / convex\_to\_straight\_\_ 'slightly concave (1-15% of ulnare depth measured perpendicular to line across tips of rami), forming metacarpal incisure to make ulnare heart-shaped' 'deeply concave (>15%), making ulnare V-shaped',

429 'Ilium - ventral extent of postacetabular process ' / completely\_dorsal\_to\_ischial\_peduncle\_tip\_\_ extends\_ventral\_to\_ischial\_peduncle\_,

430 'Sternum - posterior expansion of posteromedian process' / absent present\_but\_posteriorly\_convex\_present\_and\_posteriorly\_concave\_\_,

431 'Pubis - distal extent of posterior median groove ' / 'proximally restricted, posterodorsal edge of pubic boot rounded ' 'distally extending between most of pubic boots, posterodorsal edge of pubic boot sharply ridged forming hypopubic cup ',

432 'Tibia - midshaft transverse diameter compared to femur ' / '>80%' '<81%',

433 'Femur - posterior surface of femoral head ' / transversely\_flat\_to\_convex\_ with\_vertical\_groove\_near\_medial\_margin,

434 'Manual phalanx I-1 - convexity of distoventral surface proximal to condyles ' / convex\_to\_flat\_ concave\_to\_form\_flexor\_fossa\_,

435 'Tibia - angle of anterior edge of cnemial crest ' / '>10 degrees from anterior shaft edge ' '<11 degrees',

436 'Tibia - orientation of cnemial crest in proximal view ' / mostly\_anterior\_mostly\_lateral,

437 'Tibia - proximal extent of fibular crest ' / separate\_from\_lateral\_condyle\_\_ continuous\_with\_lateral\_condyle\_,

438 'Braincase - prominence of crista prootica ' / slight\_convexity\_to\_small\_ridge\_ well\_developed\_ridge\_prominent\_overhanging\_ala\_,

439 'Astragalus - contact between ascending process and fibula ' / absent\_present,

440 'Basisphenoid - expansion ' / unexpanded\_'expanded ventrally, posteriorly and laterally due to extensive pneumatization ',

441 'Supraoccipital - posterior median surface ' / pronounced\_sagittal\_crest\_\_ concave\_to\_slightly\_convex,

442 'Vomer - posterior extent ' / ends\_anterior\_to\_subtemporal\_fenestra\_\_ extends\_posterior\_to\_anterior\_edge\_of\_fenestra\_,

443 'Dentary - angle of symphysis ' / '>45 degrees from dorsal dentary margin ' '<46 degrees',

444 'Dentary teeth - labiolingual compression of teeth 1-2' / 'labiolingual width <90% of mesiodistal length '>89%',

445 'Teeth - labiolingual compression of lateral tooth crowns ' / 'labiolingual width <80% of FABL ' '>79%',

446 'Cervical vertebrae - transverse convexity of ventral centrum surface' / convex\_or\_flat\_\_ concave,

447 'Dorsal vertebrae - height of neural arch in mid dorsals (4-6)' / distance\_from\_neurocentral\_suture\_to\_prezygapophysis\_less\_than\_height\_of\_anterior\_articular\_surface\_\_ greater,

448 'Dorsal vertebrae - diameter of parapophysis on mid dorsals (4-6)' / '<66% height of anterior articular surface' '>65% ',

449 'Dorsal vertebrae - division of infrazygapophyseal fossae in mid dorsals (4-6)' / undivided\_ accessory\_centrodiapophyseal\_laminae\_present,

450 'Dorsal vertebrae - inclination of diapophysis in mid dorsals (4-6)' / inclined\_or\_horizontal\_ declined,

451 'Dorsal vertebrae - anterior bifurcation of neural spine in dorsal view ' / absent\_present,

452 'Dorsal vertebrae - posterior bifurcation of neural spine in dorsal view ' / absent\_present,

453 'Sacral vertebrae - fusion of neural spines ' / all\_separate at\_least\_some\_fused\_into\_a\_continuous\_lamina\_,

454 'Furcula - curvature of arms ' / 'straight or curved laterally to form V-shape ' 'curved medially to form U-shape ',

455 'Scapula - dorsal edge of scapular blade ' / straight\_or\_evenly\_curved\_\_ with\_flange\_,

456 'Humerus - size of bicipital crest' / 'low, projected <45% of minimum humeral width from humeral head' 'moderate, projected 45-100% of minimum humeral width ' 'prominent, projected >100% of minimum humeral width ',

457 'Humerus - angle of bicipital crest in proximal view ' / '<45 degrees from long axis of humeral head' 'angled laterally/posteriorly 45 degrees or more from long axis of humeral head',

458 'Humerus - separation of bicipital crest from humeral head ' / confluent\_'separated laterally (posteriorly in Aves) by capital groove',

459 'Humerus - shape of bicipital crest' / with\_convex\_outer\_edge\_ with\_straight\_to\_concave\_outer\_edge\_,

460 'Humerus - posteromedial surface of midshaft ' / flat\_with\_crest\_\_,

461 'Humerus - anterior surface proximal to ectepicondyle ' / flat\_with\_tuberosity\_,

462 'Humerus - angle of torsion between long axes of proximal and distal ends ' / '>32 degrees ' '<33 degrees ',

463 'Humerus - anterior flexure of distal end ' / significant\_absent\_or\_slight\_,

464 'Humerus - shape of entepicondyle ' / hemispherical\_'proximodistally elongate, crest-like',

465 'Humerus - anteromedial surface proximal to entepicondyle ' / flat\_with\_longitudinal\_groove\_,

466 'Metacarpal I - ventrolateral surface ' / unprojected\_with\_flange\_underlying\_metacarpal\_II\_,

467 'Metacarpal III - convexity of lateral margin ' / straight\_or\_concave\_convex\_,

468 'Manual ungual II - length compared to metacarpal II ' / shorter\_or\_equal\_longer\_,

469 'Ilium - distance between dorsal edge of mid ilium and sacral neural spines ' / 'marginal, ilia almost contact neural spines ' significant,

470 'Ilium - lateral surface of posterodorsal corner of postacetabular process ' / flat\_ with\_small\_rugosity\_with\_large\_tuber\_,

471 'Ilium - transverse compression of pubic peduncle distal surface' / more\_than\_twice\_as\_long\_as\_wide\_\_ 'length 50-200% of width ' less\_than\_half\_as\_long\_as\_wide\_,

472 'Ilium - angle pubic peduncle distal articular surface projects ' / '>17 degrees anteriorly' '17 degrees anteriorly\_to\_9\_degrees\_posteriorly '>9 degrees posteriorly',

473 'Ilium - ventral extent of antitrochanter' / ends\_proximal\_to\_articular\_surface\_of\_ischial\_peduncle\_extends\_to\_ventral\_edge\_of\_ischial\_peduncle\_,

474 'Ilium - shape of antitrochanter ' / with\_flattened\_ventral\_side\_\_ hemispherical,

475 'Ischium - proximal enclosure of obturator notch' / absent\_'present, process on ventral edge of pubic peduncle curves distally',

476 'Ischium - proximodorsal position of mid dorsal process" apex' / '<67% down ischium ' '>66%',

477 'Pubis and ischium - shape of subacetabular contact ' / straight\_or\_simply\_curved sinuous,

478 'Pubis - anteroposterior expansion of distal shaft ' / less\_than\_twice\_minimum\_shaft\_depth\_ at\_least\_twice\_.

479 'Femur - angle of femoral head to shaft ' / declined\_to\_perpendicular\_\_ inclined,  
 480 'Femur - anteroposterior constriction of femoral head in proximal view ' /  
 at\_most\_constricted\_to\_80%\_of\_medial\_head\_width\_ 'constricted to <80% of medial head width ',  
 481 'Femur - anteroposterior width of greater trochanter ' /  
 narrower\_than\_or\_equal\_to\_width\_of\_femoral\_head\_wider,  
 482 'Femur - ventral constriction of femoral head ' / present absent,  
 483 'Tibia - depth of incisura tibialis compared to proximal width of tibia ' / '>15%' '<16%',  
 484 'Tibia - transverse compression of proximal end ' / longer\_than\_wide\_  
 equal\_or\_wider\_than\_long\_  
 485 'Tibia - distal extent of fibular crest ' / 'ends at <45% of tibial length ' '>44%',  
 486 'Fibula - angle of proximal edge ' / '<16 degrees from perpendicular to long axis of shaft ' '>15  
 degrees anteroproximally',  
 487 'Fibula - proximodistal position of iliofibularis tubercle apex ' / 'placed <41% down length of  
 fibula ' '>40%',  
 488 'Fibula - transverse width of posterior half in proximal view ' /  
 equal\_to\_or\_wider\_than\_anterior\_half\_ 'narrower, forming posteriorly tapered surface ',  
 489 'Tibia - distal exposure of lateral condyle ' / 'absent, covered by astragalocalcaneum '  
 present\_due\_to\_reduction\_in\_astragalus\_  
 490 'Femur - convexity of proximal surface between head and greater trochanter ' /  
 convex\_to\_slightly\_concave\_strongly\_concave,  
 491 'Maxillary teeth - position of largest teeth ' / in\_anterior\_third\_larger\_in\_middle\_third\_  
 in\_posterior\_third\_  
 492 'Tibia - anterior exposure of mediodistal corner of tibia ' / covered\_by\_astragalus exposed,  
 493 'Caudal vertebrae - separation of tip of distal caudal prezygapophyses ' / unseparated  
 bifurcated,  
 494 'Braincase - confluence of otic recess and lateral depression ' / separate  
 within\_common\_depression,  
 495 'Postorbital and jugal - minimum anteroposterior length of postorbital bar ' /  
 less\_than\_or\_equal\_to\_minimum\_anteroposterior\_length\_of\_lacrimal\_greater,  
 496 'Lacrimal - separation from postorbital dorsal to orbit ' / wide narrow absent,  
 497 'Premaxillary teeth - labiolingual compression ' / longest\_axis\_mesiodistal\_  
 longest\_axis\_labiolingual,  
 498 'Premaxillary teeth - lingual surface ' / flat\_with\_central\_basoapical\_ridge\_  
 499 'Infratemporal fenestra - posterior constriction caused by squamosal and quadratojugal ' /  
 'greatest anteroposterior width of posterior intrusion into fenestra / greatest anteroposterior width of fenestra if protrusion  
 were absent <10% ' '>9%',  
 500 'Nasals - convexity of dorsolateral surface ' / 'concave to right-angled ' 'sharply convex, forming  
 paired ridges or crests',  
 501 'Ilium - lateral surface dorsal to acetabulum ' / flat\_or\_slightly\_rounded\_\_  
 with\_well\_defined\_vertical\_ridge,  
 502 'Nasal - lateral surface along or inside antorbital fossa ' / solid\_  
 pierced\_by\_at\_least\_one\_pneumatic\_foramen,  
 503 'Articular - transverse width of retroarticular process ' /  
 equal\_to\_narrower\_than\_mandible\_anterior\_to\_glenoid\_wider\_than\_mandible\_anterior\_to\_glenoid\_  
 504 'Basioccipital and basisphenoid - transverse width across basipterygoid processes ' /  
 equal\_to\_less\_than\_anteroposterior\_length\_between\_anterior\_edge\_of\_basipterygoid\_processes\_and\_posterior\_edge  
 \_of\_basal\_tubera\_\_ greater,  
 505 'Ischium - transverse convexity of acetabular surface ' / convex\_or\_flat\_  
 concave\_due\_to\_sagittal\_groove,  
 506 'Paraquadrate foramen - dorsoventral size ' / '<18% of quadrate height ' '>17%',  
 507 'Paraquadrate foramen - composition of lateral edge ' /  
 formed\_at\_least\_partially\_by\_quadrate\_\_ formed\_completely\_by\_quadratejugal\_  
 508 'Axis - dorsal transverse expansion of neural spine ' / tapered\_to\_equal\_to\_base\_ 'expanded  
 dorsally, resulting in epineurapophyseal processes ',  
 509 'Ilium - extent of supracetabular crest along pubic peduncle ' /  
 present\_on\_most\_of\_peduncle\_\_ present\_on\_minority\_of\_peduncle\_if\_at\_all\_  
 510 'Scapula - convexity of dorsal acromial edge ' / convex\_to\_straight\_concave,  
 511 'Basisphenoid - lateral walls of basisphenoid recess ' / unmarked\_have\_muscle\_scars\_  
 512 'Quadratojugal - convexity of external surface ' / flat\_ 'flexed at posterior border, so that distinct  
 posterior face is present ',  
 513 'Nasal - convexity of lateral edge ' / convex\_or\_straight\_\_ 'concave, so that paired nasals are  
 hourglass-shaped',  
 514 'Metatarsal III - shape of medial edge when articulated, taking into account curvature of shaft ' /  
 distally\_concave\_to\_slightly\_convex\_ with\_deep\_convexity\_localized\_distally\_  
 515 'Ilium - convexity of pubic peduncle articular surface ' /  
 convex\_with\_angled\_anterior\_and\_posterior\_components\_\_ convex\_and\_rounded\_ flat\_or\_concave\_  
 516 'Ilium - distal anteroposterior expansion of pubic peduncle ' / unexpanded\_ expanded,  
 517 'Axis - lateral surface of centrum ' / solid\_ pneumatized\_by\_pleurocoel,  
 518 'Maxilla - medial wall of maxillary antrum ' / solid\_ pneumatized\_by\_medial\_antral\_fenestra,  
 519 'Surangular - dorsoventral depth at intersection of dentary and external mandibular fenestra ' /  
 '>50% mandibular depth at that level ' '<51%',  
 520 'Pedal ungual II - convexity of posteroventral edge between articular facet and flexor tubercle ' /  
 convex\_or\_straight\_concave\_due\_to\_notch\_at\_base\_of\_tubercle\_  
 521 'Sternum - ossification ' / unossified\_in\_adult\_\_ ossified,  
 522 'Pedal digit II - length compared to pedal digit IV, excluding metatarsals and unguals ' / '>79% '  
 '<80%',



absent\_present, 523 'Metatarsal III - transverse medial and lateral bulges on shaft just proximal to articular condyle' /

524 'Metatarsal II - length compared to metatarsal IV' / 'much shorter, <98% of length of metatarsal IV' 'subequal, lengths within 2% of each other' 'much longer, >102% the length of metatarsal IV',

unprojected\_with\_longitudinal\_ridge\_, 525 'Metatarsal IV - projection of lateral surface dorsal to lateral flexor ridge on distal end' /

extends\_posterior\_to\_interfenestral\_wall\_, 526 'Maxilla - posterior extent of postantral wall' / no\_greater\_than\_interfenestral\_wall\_\_

527 'Teeth - texture of labial and lingual surfaces' / smooth\_fluted\_basoapically\_,

evenly\_projected\_along\_spine\_ 528 'Dorsal vertebrae - anterior projection of interspinal ligament scars on neural spine' / 'more projected dorsally, forming beak-like process',

covered\_by\_lateral\_lamina\_of\_dorsal\_process\_\_at\_least\_partially\_visible\_laterally\_\_, 529 'Maxilla - lateral exposure of promaxillary fenestra' /

530 'Antorbital fossa - proportions' / longer\_than\_tall equal\_to\_taller\_than\_long,

531 'Jugal - length of posterior process' / '>15% of total jugal length' '<16%',

posteriorly\_concave, 532 'Furcula - cross section of omal ends of arms' / posteriorly\_convex\_to\_flat\_

pleurocoels\_absent, 533 'Cervical vertebrae - post-axial central pneumatization' / pleurocoels\_present

prezygapophyses\_articulate\_ventral\_to\_postzygapophyses prezygapophyses\_articulate\_dorsal\_to\_postzygapophyses,

535 'Uncinate processes - articulation to dorsal ribs' / unfused\_fused,

distinctly\_projected\_as\_a\_semilunate\_ridge\_, 536 'Ulna - posterior projection of dorsal condyle' / unprojected\_or\_minimally\_projected\_

537 'Ischium - distal extent of pubic contact' /

limited\_to\_acetabular\_area\_and\_sometimes\_obturator\_process 'extensive, along most of ischial shaft',

538 'Nasals - transverse convexity of combined dorsal surface' / relatively\_flat\_to\_concave

strongly\_convex,

539 'Jugal - convexity of anterior tip' / convex\_concave\_due\_to\_bifurcation,

540 'Radius - length compared to humerus' / '<51%' '50-90%' '91-110%' '>110%',

541 'Premaxillae - form of contact at symphysis' / unfused\_fused\_anteriorly\_but\_not\_posteriorly

completely\_fused,

542 'Dentaries - form of contact at median' / unfused\_fused,

543 'Dentary - anteroventral surface of tip' / smooth\_

with\_groove\_extending anterolaterally\_from\_ventral\_corner\_of\_symphysis\_\_,

544 'Premaxilla - length of ventral margin' / '<91% of orbit+jugal height' '>90%',

'>60%', 545 'Premaxilla - length of dorsal process' / 'from tip of snout, extends <61% of preorbital length'

546 'Vomer - extent of contact with pterygoid' / broad\_narrow absent,

547 'Palatine - extent of contact with pterygoid' / 'long, overlapping' 'short, vertical',

548 'Palatine - contact with premaxilla' / absent present,

549 'Vomer - contact with premaxilla' / present absent,

550 'Basisphenoid - anteroposterior position of basiptyergoid processes' /

located\_basally\_on\_basisphenoid\_body located\_anteriorly\_on\_parasphenoid\_rostrum\_,

551 'Basisphenoid - orientation of articulation with pterygoid' / anteroventral mediolateral

dorsoventral,

552 'Pterygoid - convexity of articulation with basisphenoid' / concave flat\_to\_low\_and\_convex

'highly convex, forming stalk',

553 'Pterygoid - angle between palatal process and posterior end in lateral view' / 'present,

posterior end kinked dorsally' 'absent, element straight',

554 'Interorbital septum - ossification' / unossified ossified,

555 'Mesethmoid - anterior extent' / barely\_surpasses\_frontals\_if\_at\_all\_

extends\_far\_anterior\_to\_frontals,

556 'Basisphenoid - lateromedial position of ossified eustachian tubes' / lateral

medial\_but\_widely\_separated\_medial\_and\_adjacent\_or\_medial\_and\_confluent\_,

557 'Basisphenoid - ventral surface anterior to basisphenoid recess' / solid

perforated\_by\_paired\_foramina\_or\_medain\_foramen\_for\_ossified\_eustachian\_tubes,

558 'Squamosal - length of ventral process' / projects\_noticeably\_ventral\_to\_quadrate\_notch\_

absent,

559 'Quadrate - form of articulation with pterygoid' /

pterygoid\_broadly\_overlaps\_medial\_surface\_of\_pterygoid\_process

restricted\_to\_anteromedial\_edge\_of\_process\_or\_body\_of\_quadrate\_,

560 'Quadrate - position of articulation with pterygoid' / extends\_to\_tip\_of\_pterygoid\_process\_

'extends to pterygoid process, but ends before tip' restricted\_from\_pterygoid\_process,

561 'Quadrate - convexity of pterygoid articulation' / flat\_or\_slightly\_convex highly\_convex,

562 'Quadrate - anterolateral surface on dorsal portion of pterygoid process' / flat\_with\_tubercle,

563 'Quadrate - form of articulation with quadratojugal' / planar condylar trochlear,

564 'Quadrate - proximal articulation with prootic and/or opisthotic' / absent present,

565 'Quadrate - number of distal condyles on posterior edge' / two\_or\_less 'three, with posterior

condyle between lateral and medial condyles',

566 'Articular - pneumaticity' / solid pneumatized\_by\_diverticulum\_of\_the\_tympnic\_airsac\_,

567 'Splénial - anterior extent' / does\_not\_extend\_close\_to\_mandibular\_symphysis\_ 'extends

close to, but does not participate in mandibular symphysis' participates\_in\_mandibular\_symphysis\_,

568 'Dentaries - transverse convexity of posterior symphysis' / concave flat\_or\_convex,

569 'Dentaries - dorsal surface of fused symphysis' / solid with\_one\_or\_more\_foramina\_,

570 'Dentaries - arrangement of symphyseal foramina' / median paired,

571 'Dentaries - position of symphyseal foramina ' / on\_posterior\_edge\_of\_symphysis\_ on\_dorsal\_surface\_of\_symphysis,

572 'Splenic - medial overlap of Meckelian groove ' / 'absent, Meckelian groove exposed ' 'present, Meckelian groove hidden ',

573 'Jugal - contact with postorbital ' / present absent,

574 'Frontal - contact with parietal ' / unfused fused,

575 'Cervical vertebrae - convexity of posterior articular surface ' / flat\_or\_concave convex 'concave dorsoventrally, convex horizontally ',

576 'Dorsal vertebrae - size of hypapophyses on dorsals posterior to third ' / absent\_or\_small large\_on\_at\_least\_some,

577 'Dorsal vertebrae - number ' / more\_than\_12 12 11 10\_or\_less,

578 'Dorsal vertebrae - anteroposterior position of parapophyses ' / anterior\_to\_diapophyses\_ at\_same\_level\_as\_diapophyses\_,

579 'Dorsal vertebrae - transverse compression of centra ' / length\_less\_than\_midlength\_width\_ length\_equal\_to\_or\_greater\_than\_midlength\_width\_,

580 'Dorsal vertebrae - convexity of lateral centrum surface ' / convex\_to\_slightly\_depressed\_ 'highly concave due to deep fossa, which may be dorsoventrally compressed to form a groove ',

581 'Dorsal vertebrae - connection of adjacent transverse processes ' / 'absent, processes separate' processes\_connected\_by\_ossified\_ligaments\_,

582 'Dorsal vertebrae - fusion ' / no\_dorsals\_fused\_together\_ at\_least\_two\_anterior\_dorsals\_fused\_to\_form\_notarium,

583 'Sacrum - length of ancestral avepod thirteenth dorsal and first two sacral centra ' / at\_least\_one\_longer\_or\_equal\_to\_more\_anterior\_and\_posterior\_centra\_all\_shorter\_than\_surrounding\_centra\_ at\_least\_one\_adjacent\_centrum\_also\_shorter\_than\_surrounding\_centra\_,

584 'Caudal vertebrae - length of transverse processes in caudals 1-5' / equal\_to\_or\_longer\_than\_centrum\_width\_shorter\_than\_centrum\_width\_,

585 'Caudal vertebrae - number fused into pygostyle ' / more\_than\_five\_three\_to\_five two,

586 'Gastralia - ossification ' / ossified unossified,

587 'Sternum - extent of ventral median keel ' / restricted\_to\_the\_posterior\_part\_ extends\_from\_close\_to\_anterior\_edge\_to\_posterior\_part\_restricted\_to\_the\_anterior\_part\_,

588 'Sternum - pneumatization of dorsal surface ' / solid invaded\_by\_one\_or\_more\_diverticula\_of\_the\_clavicular\_airsac\_,

589 'Sternum - pneumatization of lateral edge between sternal rib articulations ' / solid invaded\_by\_diverticula\_of\_the\_clavicular\_airsac\_,

590 'Sternum - distance between coracoid sulci ' / wide narrow sulci\_overlap,

591 'Sternum - number of sternal ribs that contact sternum ' / two\_or\_less three four five six seven\_or\_more,

592 'Sternum - topology of ventral surface lateral to midline ' / smooth 'with longitudinal ridge, an intermuscular line between the m. supracoracoideus and m. pectoralis ',

593 'Sternum - shape of posterior edge near midline ' / unprojected\_without\_fenestra\_ with\_free\_posteromedial\_processes 'with posteromedial processes fused distally with posteromedian process, forming paired fenestrae ',

594 'Clavicles - median fusion ' / fused\_to\_form\_furcula\_unfused,

595 'Furcula - shape of omal tips in dorsal/ventral view ' / flat\_to\_rounded\_pointed,

596 'Furcula - shape of ventral edge ' / convex flat\_to\_concave,

597 'Scapulocoracoid - convexity of mobile articulation ' / 'concave on scapula, convex on coracoid' flat\_on\_both\_bones\_ 'convex on scapula, concave on coracoid ',

598 'Coracoid - topology of anterior (medial in Aves) edge near level of scapular articulation ' / unprojected\_with\_procoracoid\_process\_,

599 'Coracoid - convexity of posterior (lateral in Aves) margin of distal portion ' / concave\_or\_straight convex,

600 'Coracoid - pneumatization of proximal area, near scapular articulation or coracoid tuber ' / solid invaded\_by\_diverticula\_of\_the\_clavicular\_airsac\_,

601 'Coracoid - pneumatization of mediolateral (posterodistal in Aves) area, near sternal articulation ' / solid invaded\_by\_diverticula\_of\_the\_clavicular\_airsac\_,

602 'Coracoid - shape of posterior (lateral in Aves) edge just proximal to sternal articulation ' / confluent\_with\_more\_proximal\_part\_of\_edge\_projected\_into\_lateral\_process\_,

603 'Coracoid - topology of posterior area of lateral surface (lateral area of anterior surface in Aves) ' / smooth 'with ridge extending distally from coracoid tuber to sternal articulation, an intermuscular line between origins of the m. supracoracoideus and m. coracobrachialis posterior ',

604 'Coracoid - shape of acrocoracoid process ' / straight\_or\_curved\_laterally\_curved\_medially,

605 'Coracoid - position of supracoracoid nerve ' / 'passes through coracoid, resulting in coracoid foramen' 'does not penetrate coracoid, coracoid foramen absent ',

606 'Coracoid - convexity of external surface surrounding coracoid foramen ' / concave flat\_or\_convex,

607 'Coracoid - size of portion proximal to biceps tuber ' / 'present, forming distinct protrusion or area of the bone' absent, biceps tuber at same level as scapular articulation ',

608 'Scapula - curvature of shaft in lateral view ' / straight\_or\_dorsally\_curved\_ventrally\_curved,

609 'Scapula - curvature of acromion ' / lateromedially\_straight\_or\_medially\_curved\_ anterior\_portion\_curved\_laterally,

610 'Humerus - convexity of proximal edge of humeral head when viewed perpendicular to long axis' / concave\_to\_flat convex,

611 'Humerus - closure of capital groove ' / groove\_open groove\_closed,

612 'Humerus - convexity of anterior edge of head in proximal view ' / straight\_to\_convex\_ concave,

613 'Humerus - separation of head from more distal humerus on anterior surface ' / confluent separated\_by\_transverse\_groove\_for\_acrocoracohumeral\_ligament\_

614 'Humerus - orientation of deltopectoral crest in proximal view ' / in\_line\_with\_long\_axis\_of\_humeral\_head\_angled\_from\_long\_axis\_of\_humeral\_head\_

615 'Humerus - convexity of proximolateral/posterior surface of deltopectoral crest ' / convex\_or\_flat\_concave\_

616 'Humerus - surface of deltopectoral crest ' / solid\_perforated\_by\_fenestra\_

617 'Humerus - surface of bicipital crest ' / smooth\_scar\_or\_fossa\_for\_m.\_scapulohumeralis\_posterior\_

618 'Humerus - position of m. scapulohumeralis posterior insertion ' / 'medial (anterior in Aves) surface of bicipital crest ' distal\_surface\_of\_bicipital\_crest\_'lateral (posterior in Aves) surface of bicipital crest '

619 'Humerus - medial (anterior in Aves) projection of bicipital crest ' / absent\_moderate\_highly\_convex\_

620 'Humerus - proximal pneumaticity ' / solid'invaded by diverticulum of the clavicular airsac near base of lateral (posterior in Aves) surface of bicipital crest '

621 'Humerus - orientation of ectocondyle ' / mostly\_proximodistal\_mostly\_transverse\_

622 'Humerus - shape of entocondyle ' / rounded'ridge-like',

623 'Humerus - angle of distal edge ' / perpendicular\_to\_shaft\_or\_angled\_so\_that\_ectocondyle\_is\_further\_distal\_angled\_so\_that\_entocondyle\_is\_further\_distal\_

624 'Humerus - anterior surface just proximal to condyles ' / flat\_concave\_for\_origin\_of\_M.\_brachialis\_inferior\_

625 'Humerus - size of entocondyle ' / long\_axis\_shorter\_than\_long\_axis\_of\_ectocondyle\_equal\_or\_longer\_

626 'Humerus - lateral side of posterior surface on distal end ' / flat\_with\_longitudinal\_groove\_for\_passage\_of\_m.\_scapulotriceps\_

627 'Humerus - medial side of posterior surface on distal end ' / flat'with longitudinal groove for passage of m. humerotricipitalis, confluent with olecranon fossa '

628 'Ulna - separation of lateral and medial cotylae ' / confluent\_or\_only\_separated\_by\_ridge\_separated\_by\_groove\_

629 'Ulna - convexity of lateral cotyla ' / concave\_or\_flat\_convex\_

630 'Ulna - anteroproximal surface ' / flat\_scar\_for\_the\_insertion\_of\_the\_M.\_biceps\_brachii\_tubercle\_for\_the\_insertion\_of\_the\_M.\_biceps\_brachii\_

631 'Ulna - anteromedial surface of proximal end ' / flat\_scar\_for\_insertion\_of\_m.\_brachialis\_

632 'Radius - posterolateral surface ' / flat\_with\_long\_scar\_for\_m.\_pronator\_teres\_with\_long\_groove\_

633 'Ulnare - length of medial (ventral) ramus ' / shorter\_than\_lateral\_ramus\_subequal\_to\_lateral\_ramus\_longer\_than\_lateral\_ramus\_

634 'Metacarpal III - distal contact with metacarpal II ' / 'absent, contacting or sutured ' fused,

635 'Metacarpal III - minimum transverse width compared to minimum transverse width of metacarpal II ' / '>49%' '<50%',

636 'Metacarpal I - development of medial process for insertion of m. extensor metacarpi ulnaris' / unprojected\_or\_slightly\_convex\_'greatest length of extensor process (measured medially from proximal metacarpal articular surface and lateralmost part of medial edge of metacarpal I) 8-20% of transverse width between medial edge of distal articular surface of metacarpal I and lateral edge' '21-30%' '>30%',

637 'Metacarpal I - proximodistal convexity of medial edge ' / concave\_or\_straight\_convex\_

638 'Metacarpal II - proximal part of ventral surface ' / flat\_pisiform\_process\_for\_retinaculum\_flexorum\_

639 'Distal carpal I - ventral surface ' / flat\_with\_infratrochlear\_fossa\_for\_ventral\_radiocarpometacarpal\_ligament\_

640 'Metacarpal III - distal extent ' / proximal\_to\_or\_subequal\_to\_metacarpal\_II\_distal\_to\_metacarpal\_II\_

641 'Metacarpal II - dorsolateral surface near middle of shaft ' / smooth\_scar\_for\_insertion\_of\_m.\_extensor\_carpi\_ulnaris\_longus\_intermetacarpal\_tubercle\_or\_process\_for\_insertion\_of\_m.\_extensor\_carpi\_ulnaris\_longus\_

642 'Manual phalanx II-1 - projection of laterodistal margin ' / does\_not\_extend\_distally\_past\_articular\_surface\_extends\_past\_surface\_as\_internal\_index\_process\_

643 'Pubis - contact with ilium ' / articulated\_fused\_

644 'Ischium - contact with ilium ' / articulated\_fused\_

645 'Pubis - contact with ischium ' / articulated\_fused\_

646 'Ischium - contact between mid dorsal process and ilium ' / absent\_present\_

647 'Ischium - contact between proximodorsal process and ilium ' / absent\_present\_

648 'Ilium - position of antitrochanter ' / mostly\_posterior\_to\_acetabulum\_mostly\_dorsal\_to\_acetabulum\_

649 'Pelvis - development of pubic tubercle on anterolateral surface of proximal pubis or pubic peduncle of ilium' / undeveloped\_or\_a\_scar\_'process for attachment of inguinal ligament, M. obliquus abdominus and/or M. ambiens '

650 'Iliia - contact between dorsal edges of preacetabular processes or between dorsal edges and sacral neural spines' / absent\_or\_freely\_contacting\_fused\_

651 'Ilium - overlap with last dorsal rib ' / absent\_present\_

652 'Ilium - orientation of postacetabular process in section ' / mostly\_vertical\_mostly\_horizontal\_

653 'Ilium - internal surface of postacetabular process ' / flat\_with\_renal\_fossa\_for\_posterior\_portion\_of\_kidney\_

654 'Pubis - transverse compression of midshaft ' / anteroposteriorly\_compressed\_or\_equal\_transversely\_compressed\_

655 'Femur - convexity of anterior edge of distal end' / convex\_to\_slightly\_concave 'markedly concave, forming deep extensor or patellar groove',

656 'Femur - confluence between lateral condyle and ectocondylar tuber' / separated\_by\_notch\_joined\_into\_tibiofibular\_crest\_,

657 'Femur - posterior projection of posterior surface just proximal to lateral condyle' / in\_line\_with\_medial\_surface\_distinctly\_more\_posteriorly\_projected\_than\_medial\_surface\_,

658 'Femur - transverse position of lateral edge of ectocondylar tuber or tibiofibular crest' / 'far medial to lateral edge of lateral condyle, <90% of distance across condyles, measured from medial edge' 'roughly in line with lateral edge of lateral condyle, 90-100% of distance across condyles' 'lateral to lateral edge of lateral condyle, >100% of distance across condyles',

659 'Astragalocalcaneum - anterior projection of medial condyle' / much\_greater\_than\_lateral\_condyle 'slightly greater to less than lateral condyle (measuring from a line across the posterior tip of each condyle, medial condyle extends anteriorly <110% as much as lateral condyle)',

660 'Tibiotarsus - lateral side of anterior surface just proximal to distal condyles' / flat with\_open\_longitudinal\_extensor\_canal\_for\_ligament\_of\_m\_extensor\_digitorum\_longus\_ossified\_ligament\_crossing\_extensor\_canal\_to\_form\_supratendinal\_bridge\_,

661 'Astragalus - anterior surface of ascending process' / concave\_or\_flat\_ with\_tubercle\_for\_attachment\_of\_retinaculum\_bridging\_m\_tibialis\_cranialis\_and\_m\_digitorum\_longus\_,

662 'Astragalocalcaneum - transverse width of medial condyle' / '>110% transverse width of lateral condyle (measured from point of greatest constriction between condyles)' '<90%',

663 'Astragalocalcaneum - convexity of anterior edge of medial condyle' / highly\_convex straight\_or\_almost\_straight\_,

664 'Tibia - proximal extent of trochlea for the tibial cartilage on the posterior surface of the distal end' / proximal\_extent\_less\_than\_51%\_of\_distal\_tibiotarsus\_transverse\_width\_'>50%',

665 'Tibia - definition of lateral and medial edges of trochlea for the tibial cartilage on the posterior surface of the distal end' / undifferentiated\_from\_adjacent\_bone\_or\_low\_rounded\_ridges\_defined\_by\_sharp\_crests\_continuous\_with\_distal\_condyles\_,

666 'Tibia - distal transverse expansion' / 'transverse width just proximal to distal condyles >150% of midshaft transverse width' '<151%',

667 'Metatarsal V - presence' / present absent,

668 'Tarsometatarsus - proximal surface' / flat with\_central\_raised\_intercotylar\_eminence\_,

669 'Tarsometatarsus - proximal part of posterior surface' / flat raised\_hypotarsus\_with\_flat\_posterior\_surface raised\_hypotarsus\_with\_grooved\_posterior\_surface\_for\_flexor\_tendons\_ raised\_hypotarsus\_with\_perforated\_posterior\_surface\_for\_flexor\_tendons\_,

670 'Metatarsus - dorsal and ventral surface near proximal end between metatarsals III and IV' / solid with\_vascular\_foramen\_,

671 'Metatarsus - dorsal and ventral surface near proximal end between metatarsals II and III' / solid with\_vascular\_foramen\_,

672 'Metatarsal I - posterior curvature' / 'absent, shaft straight in medial view' 'present, shaft J-shaped',

673 'Metatarsal II - surface for articulation of metatarsal I' / flat\_or\_convex\_slightly\_concave well\_developed\_fossa\_,

674 'Metatarsal II - transverse width of trochlea' / '<80% of metatarsal III trochlea' '80-130% of metatarsal III trochlea' '>130% of metatarsal III trochlea',

675 'Metatarsal IV - transverse width of trochlea' / '<60% of metatarsal III trochlea' '60-200% of metatarsal III trochlea' '>200% of metatarsal III trochlea',

676 'Metatarsus - distal surface between fused metatarsals III and IV' / solid\_ with\_vascular\_foramen\_,

677 'Metatarsal III - proximal extent of lateral trochlear edge on posterior surface' / less\_than\_or\_equal\_to\_medial\_trochlear\_edge\_greater\_than\_medial\_trochlear\_edge\_,

678 'Chevrons - length of posterodistal process on distal caudals' / shorter\_than\_centrum\_longer\_than\_centrum\_,

679 'Exoccipital - length of metotic strut, measured from base of paroccipital process to tip of basal tuber' / '<35% of height from tip of basal tuber to skull roof' '>34%',

680 'Basisphenoid - lateral surface ventral to trigeminal (V) nerve foramen and anteroventral to otic recess' / flat\_excavated\_by\_main\_portion\_of\_anterior\_tympanic\_recess\_,

681 'Basisphenoid - position of anterior tympanic recess' / extends\_posterior\_to\_basipterygoid\_processes\_restricted\_to\_above\_or\_anterior\_to\_basipterygoid\_processes\_,

682 'Pedal phalanx II-2 - height of distal end' / greater\_than\_79%\_height\_of\_proximal\_end less\_than\_80%,

683 'Ulna - size of lateral cotyla' / smaller\_than\_medial\_cotyla equal\_or\_larger\_than\_medial\_cotyla,

684 'Quadratojugal - size' / 'length of ventral margin >29% of jugal+orbit height' '<30%',

685 'Frontal - surface of articulation for postorbital' / smooth\_or\_slightly\_notched\_ deeply\_notched,

686 'Furcula - cross section of center' / compressed\_dorsoventrally\_to\_slightly\_compressed\_anteroposteriorly highly\_compressed\_anteroposteriorly,

687 'Furcula - width of epicleidial ends' / equal\_or\_narrower\_than\_arms\_broader\_than\_arms\_,

688 'Furcula - width of arms' / equal\_or\_narrower\_than\_center\_and\_epicleidia\_ broader\_than\_center\_and\_epicleidia\_,

689 'Furcula - anterior surface of hypocleidium' / flat\_or\_rounded\_keeled,

690 'Furcula - symmetry' / asymmetrical\_nearly\_symmetrical,

691 'Furcula - robusticity' / 'width halfway down arms <20% of arm length' '>19%',

692 'Distal caudal vertebrae - separation of postzygapophyses' / separated\_posterior\_to\_centrum\_joined\_by\_lamina\_past\_centrum,

































1}000000000001?10000110010000(0 1)2011012101(0 1)00(0 1 2)01100010001010112000-  
000101100011000000000111020000?-1000001000-21000011-000000000010000001000?000000-  
000?0002100001000?00001100?000011??000011--0-00101?00000100100-1(1 2)1010101(0  
1)11100111121110100100(0 1)0(0 1)100000-0010(0 1)00000001000010-0000-0010100-000000?00000-0-0000-?  
0(0 1)0-000000-000101-?11100-(0 1)01001100-{0 1}0{0 1}-01000?0{0 1}0000-0-1010011000000{0 1}0000000--0001-  
000100-01010-?0110000000

Alioramus ?003(0 1)(0 1)11000-0?111000001001?1110100(0 1)000001112011(0 1)-  
1011100001110000110000000010?12001000000101011110?010000000(0 1)?0012?000{0 1}00?0?1?1{0  
1}0?0????????10????????????????????????????????0000010{0 1}1210000{0 1 2}{0 1}1??????(0  
1)10001100?0?0101100N{0 1}00200?0?100000(0 1)000001001001?2{0  
1}??????0????0?00????00????????10?00000?0001?10?00?10?00?00-201????210100000110001(0  
1)??1011111000-00000110(0 1)010????????????????????{0 1}{0 1}1?01100??2{0 1}0??0?11?0?000N000??00(0  
1)?????????????0?01??0210001?00????001?????????????????00{0 1}--0-1?1000?0????00100-1(1 2)?10(0 1)-  
110(0 1)110?0?11211?0??1{1 2}0100100?00?010?00000{0 1}0000?0?1????000-0010?00---  
000?0?010?00?????????--??211-1?010?01????1000??1?0

Tyrannosaurus ?00(2 3)0011000-1111100000100101010100(0 1)00000101(1 2)0210-1(0  
1)111000011(0 1)00(0 1)10000000101001200100000010101110101000000(0 1)(0 1)000120(0 1)00100000101{0  
1}000000---0000(0 1)00011002001000114011-100?-010200001(0 1)01(1 2)100001111000(0  
1)00000011002000101100000020010001000010100100001000(0 1)02(0 1)00000011---000000100010100??1000(0  
1)000000001000010100001100102000201112101000101100010?0101011(0 1)000-  
00010110001001000000000100200001-0001011000-110000111-0000000000100000000010100?0-  
001?0002000000(0 1)00000011(0 1)000000011000000010100-10100000001001100-  
1210101011111001111211101001(0 1 2)000(0 1)00000-00100000000000010-0000-0010100---0000000(0  
1)0000?0---(0 1)--00(0 1)-000011-010001-100000-000001100--101?01000000000(0 1)-001001101010020000001--  
0011--00100-01110-(0 1)(0 1)100(0 1)00000

Coelurus  
????????????????????????????????????????????????????????????????020?1????????????{1  
2}??????11????01?00(0 1)00001100????000000{0 1}????????????N??020110010NNN1?{0  
1}?????1????????????????????????????010020010001?0010?10010NNNN?0{0 1}0????????????????????{0  
1}020??{0  
1}?????100110??0??211??21??{0 1}0??110?0??1000????1?0????2  
3}??2000????00?N0?0??00?01?00000????01?????1??????(0 1)????00??2000011001?????0  
1}?????10100?000?00?0?0?0????????????????????????????????0?0?0??00?0??1????????????????????  
??????????00{0 1 2}010?????????????????--????????????0-1?1?N0-00?01110011{0 1}1{0  
1}N?00?000N?N??000??00000??-??21--??0?0?0?0?0?0?01

Tanycolagreus  
1}????0???0000????????????????????100000?0??(0 1)?011????????0001{0  
1}??0?0??0??1????????????000N0001{0  
1}00001?1NN00000001100????????????????????1002001000110010001011NNNN0000?0001001????0??1?  
??0(1  
2)1??1??00110011?0????020000000??1?00?00?0?000?0?1?0?0?1?0?0?0?????0?21????????100??1?0?  
0??N??????????1??1??10010110011001000101??1001?00002?01000??1000??N?0?0?001010000011????  
01?000?1????????00?0?0100000001000????????100000000100?00?1?0?0?0?1?0?0?0?0?????1?100??  
0?0????0??10?000????????????000?00????0?0??0??010????0????????-01001?-010000-1000N0-  
00001100100000?N10000000????????0001000?210000?0--0001-????000????????00000?01

Aristosuchus  
????????????????????????????????????????????????????????????????????????????????????????  
????????????????01{0  
1}??00000????0????????????????????????????????00?0????????????????????????????000?1{0  
1}????????????????????????????????????????????????????220?1????????????????0????????????1?????????  
????????????????0????????????????????????????????????????????????????????????????1????????????????  
??????????????????????????????????????????????????????????????????????????????????????????1  
????????????????????????????????????????????????????????0?0??????????????????????????????????????  
????010?0?0????????????????????????????????????????????????????????????????????????????????  
????????????????????????????????????????????????????????????????????????????????????0??????????????

Bicentnaria  
????????0?????1????00????00?00?00????????????????0?0????????0?????????010000??101?  
???0????????100?1??00?0?0??1????????????????0?0??1??00?0????????00?00?0?1??1?000????????????  
????0{0 1}000?10?0?0?0?1100??0?0?0????1 2}????????????1????0{0 1}????0{0 1  
2}0?????????????1 2}0????????????0?00??1??00?0?0??0?0{0 1 2}{0 1}???1  
2}1????0????00??????1  
2}????0???1????????????????????????0?0????????????0?0????????0?0?0????????????????0??1??  
????????0????????1000?0?00????????0?0?0????0?0????????????????????????????0?0?0??  
????????0?0?0????0?0?0??00?0????010?0?????????????-??????????1-  
10?0??101011100????????????0?0??0??10?00?00?0?0????????????1?0?0?0????????1?0?1

Xinjiangovenator  
????????????????????????????????????????????????????????????????????????????????????  
????????????????????????????????????????????????????????????????????????????????????  
????????????02?001?1000????????????????????????????????????????????????????????????  
????????????????????????????????????1????????????????????????????????????????????  
????????????????????????????????????????????????????????000?1????????????????????  
????????0000000?0????????????????????????????????????????????????????????????  
????????????????????????????????????????????????????????????????????????????????  
0????????????????????????????????0?????









1)0?1010011011300100201100111?0020000010100100000000?0(0 1)???10?0??100?0-?01?000??00?1--  
?0??1??-010000?11??000??0000-00010000?00100-00?0?--10101??0100?001{0 1}1??1?001{0 1}?0-0?01-00-  
00?01?0000?0??0??0??0000-00?0??-?000?1010?000?0-----00?00-010101-??1000-{0 1}0?00?00--{0  
1}?0?0000?010000--000??00000?00000000----01-?0????-00-----??00???

Ornithomimus

????????????????????????????????????????????????????????????????????????????????????????????  
????????????????????????????????????????????????????????????????????????????????????????????  
2)????????????????????????????????????????????????????????????????????????????????????????  
????22????????011????0????0??10????????0????????0?0?0????????1????????????????????  
????????????????????11000?0?1????????110??2?0????0?1????????????????????????????????1????1??  
????????????????????00????????????????????0?0?0????????????????????1?????  
??100????????????????????????????????????????????????????????????????????????????????????  
????????????????0000?010????????????00000000?1--??01--??01????????100????0

Cerro\_del\_Pueblo\_orn

????????????????????????????????????????????????????????????????????????????????????????????  
????????????????????????????????????????????????????????????????????????????????????????????  
00?1{0 1}?{0  
1)000?10??0????00?2?????1????????????????????????????????0????????0????????0??1????????{0  
1}????????????????????????????2????????????????????????????????????????????????????????  
100??????{2  
3)?0??????0????0????????????????????????000????????????????????????????????????00000000?  
0?1?0????????????????????????????????0????????0????????????????????????????????????????  
????0????????????????????????????????????????????????????????????????????????????????????  
????????????????????0?

Tototlimimus

????????????????????????????????????????????????????????????????????????????????????????????  
????????????????????????????????????????????????????????????????????????????????????????????  
2)????????????????????????????????????????????????????????????????????????????????????????  
1)00??????1????????????????????????????????????????????????????????????????????????????  
????????????????????????????????????????????????????????????????????????????????????????  
????????????????????????????????????????????????????????????????????????????????????????  
????????????????????????1  
2)0????????????????????????????????????????????????????????????????????????????????????  
????????????????????????????????????????????????????????????????????????????????????

mongoliensis

???2?1?0????????????????????0????0?020????????0?0?0????????????020?00?1?????1-1-----?-  
0??1????0?01{0 1}00{0 1}0?0??01{0 1}????????0?00{0 1}200?0??000130?1111000010?0?{0  
1}??02?000?1000001100????011?0?000?0100?0000201--0010?{2 3}--??0??1??1-021??{0  
1}??0??200200001100?01?0?-(0 1)?????1?011?201?1?21?1?0?0?-(0 1)--11?01000??0--112211?000{0 1}0??-  
11?1??3010?0?000?01??0?--2010?{0 1}??1010011000300100210100111--?2{1 2}000-  
1?00?0?0?1?000?0?0??1?010{0 1}0?0?0????00?1????0--?00?0001?0000?0?1?00000??1?0-00????0?00000-  
0??00--1??0??0??0??0?0?0?0?0?1??-0?0????000?1????????????????0?0?0?0{0 1  
2}010?0?0????????????0?0?00101??-????0?010101????????00000?0{0 1}0000--?000?0?0?0?00{0  
1}0??00?----00-????0????????????00?00

MNAPI1762A

????????????????????????????????????????????????????????????????????????????????????????????  
????????????????????????????????0??0{0 1}{0  
1)????????????????????????????????????????????????????????????????????????????????????  
-0?1????????????02??1????????????????????0?1?  
????????????????????0????????????????????????????????1????????????????????????????  
????????????????0?11--?3?0??-  
????1????????????????????????????????????????????????????????????????????????????????  
0????????????????????0????010????????????????????????????????????????????????????????  
????????????????????????????????????????????????????????????????????????????????????  
0??1????????????1????0

sedens\_holotype\_only

????????????????????????????????????????????????????????????????????????????????????????????  
????????????????????????1??00????0????????????????????????????????????????????????????  
1}10{0  
1)????????????????????????????????????????????????????????????????????????????????  
????????????????????1??10????????1  
2)????????????????????????????????????????????????????????????????????????????????  
????????????????0????????????????????????????????1????????????????010?00-  
????????????????0????????????????????????????????1????????????????0?0????????????  
????????????00????????????????????????????????????????????????????????????????  
0?0?0????????????????????????????????????????

Rativates

00210????????????????1??????210110????????0??0{0  
1}0????????????????????{0 1}??2??0????????1-1-----?-????????????????1{0 1}00?0?0?{0 1}0 1  
2)????????????????????????????????????????????????????????????????????????????????  
1)0001?00?????1010?000{2 3}01--001?03-?10??????-?{1 2 3}??20?????1?????010000?1010-  
00????????00-??0?0??-0--?1001?000-?-?02{1 2}110000000?-?????{2 3}01000?0?0??0??-  
????????????????????0{0 1}0111--?310??-????0????0????????????????????0?0??00??????-  
????????????????????0{0 1}??0-?1?0?0000?0?0-0??-?00-????0?0??10?0?????110?-  
??0????00??00000????????????????????0--  
????????0?00????????????????????????????????????????????????????????????????111-  
00?00?00?1010??0000?1----11--??0?0????????1?10?000



Struthiomimus  
 ?00110101100111?010110?101021001011011000102000000000000101000001?0011002010001020101-1-----1-001010100(0 1)(0 1)0010?01100000?0011001000---001(0 1)001200000010001301001110000110001010002100001000010100000011002000001?(0 1)00000201--001?03-01000001101-03001(0 1)?-000(1 2)?02(0 1)??01000?010(0 1)0-00???0(1)00?(0 1)1211100-111001010-11001000--1--1022110000001?-11110030100020(0 1)01011000--2{1 2}?0-10110100110113001102001?0111--032000-(0 1)(0 1)100100001000000000?1?0?100010-0?11000{0 1}10001--???0?1-00?00000100000000?{0 1}10?-?0000?00000?00-00-10--100-???01?0(0 1)0001??1?1-001(0 1)0?-0100-0?-001(0 1)100000??00?0?0?0?0?00?0?0--?00(0 1)010?00?0-0-----00?00-010001-??1000-{0 1}0?01?101--{0 1}1{0 1}00000?00{0 1}0000--0000?0?000010010000001----{0 1}1-?01101-00-----110?00100

Gallimimus\_bullatus ?002111011001?100101101101021101010-1100010200000010000001?001100(1 2)010001020001-1-----1-0010101000000111011200000001100(0 1)00?????01100012000000?000130100011000011000101000210000100000110000001100200010?1000000201--001002-0100001?001-0200(1 2)0?0002(0 1)0201100000101000-00???100011211100-10110101-0--11001000--1--1122110?000010-11010030120020001010000--2110?10?10100110002001001100111--030000-1010010000(0 1)000000000110000000?0?0001?000{0 1}101?(0 1)--0000001?00000001100000010?00-00100100000000-00-10--100-1100-0010001011?0-?01(0 1)0?-0100?00-001010000000?0{1 2}0000-000?-0000100---000010100000-???????0?0?00-010001-101?00-001010100--110?00000?0{0 1}0000--00001000000000000001----11--00100-00?????111100100

Timimus  
 ?????????????????????????????????????????????????????????????????????????????????????????????????????????????????????

Anserimimus  
 ???????????????????????????????????????????????????????????????????????????????????????????????????????????????????????  
 ??1?0??000?(0 1)?000010?01100?0000011001?????001100020010001000130122?1(0 1)00?(0 1)1100010100021000010010001001000010010000011000000201--0?1?????????????????021?1(0 1)?0001(0 1)0210101000?0?00?00??1000?21?00?1?1?0?01?0?0?1100100?????10221????????????????????1?0????????????????????(1 2){1 2}?0?10?010001(0 1)0112001001111?0111--031000-1?000?????10?0???00?11?0???{0 1}0?0?0??1?00?1?1?1?00?0?0?00?00001100?0000(0 1)00?0-00?0?000000?00?000??0??0??0??0??11?????010??{0 1)?????00?1????????????????????????????????????????????????????????????????????????????????????????01?0?0-??0101-?1110??000001??--{0 1}0?0?000?000000--?000?000?{0 1}0?00?00?0---0{0 1}-?????-?????????00?00?00

Qiupalong  
 ???????????????????????????????????????????????????????????????????????????????????????????????????????????????????????  
 ???????????????????????????????????????????????????????????????????????????????????????????????????????????????????????  
 2)0???000010??????0?100?00100000020????1????????????????????????????????????????????????????????????????????????  
 ??????????1?????0?1????1?0?0?0?0?0?0?1?1????????????????????????????????????????????????????????????????????????  
 ?????????0?00111??20?0????????1????????????????????????????????????????????????????????????????????????????  
 0?{0 1}{0 1}000?00??0000?00?0?0?0?????????????????0??120?????100?????????????0????????????????????????????????????  
 ???????????????????????????????????????????????????????????????????????????????????????????????????????????????????  
 00????0?????10?0000??{1 2 3}--?01-?????1?????????000????00

Dromaeiomimus ?00(1 2)001011?00?1001011010210010(0 1)11(0 1)10000(0 1)20000001000000(0 1)01000001?0??101(1 2)01000(0 1)0?0001-1-----1-0010111(0 1)000001(0 1)10110000000011001000---0(0 1)1(0 1)00(0 1)200000?000030(0 1)2(1 2)1100001100010000(0 1)(1 2)100010000(0 1)1100000011002000?010(0 1)00000(2 3)01--001103-0(0 1)(0 1)00011001-021(1 2)11-001(1 2)000(0 1)1001000100000-001101000(0 1)1211100-1110101-0--11001100001--10(1 2)2100100(0 1)01?-11010030110(0 1)20001011001--(1 2)110-1(0 1)0(0 1)01(0 1)01(0 1)0(0 1)3001002101?011(0 1)-0(2 3)00(0 1)0-0(0 1)01001000(0 1)(0 1)00000000?(0 1)00011100?0-001?0001100?1--(0 1)0??100(0 1)-010000011000000010--0-0(0 1)000?000(0 1)0?00-00-10--10001000100(0 1)000(0 1)211110010?0-0101-00-0010100000????010?0???00?-?0001?0---?000?101000(0 1)0-0-----00?00-010101-10110?001001100-0??0000??0{0 1}0(0 1)(0 1)(0 1)---00000?0000?00?0000?{0 1}----00-?0010?-00-----0(1)?100100

Kinnareemimus  
 ??????????????????????????????????????????????????????????????????????????????????????????????????????????????????????  
 ?????????????????????{0 1}?????????????????????????????????????????????????????????????????????????????????1 2 3)??????????????20?0??N?NN0010????1?????????????????3?????????????????????0100????0??????????  
 ??????????0?????????0?0?0?????1?1????????????????????????????????????????????????????????????????????????  
 ?????(0 1)?100???30??????1????0????????????????????????????????????????????????????????????????????????????  
 ?????0000?1?????????????????????????????????01????????000????????????????????????????????????????????  
 ??????10????????????????????????????????????????????????????????????????????????????????????????N?N?0?0????????????000  
 ??1???(0 1)11--????0?????????0??????  
 Fukuiventor ??{1 2}101010?~111010001000?0-????00?0?????0?0?1110??01????10001??0??0?0?0?0?0?02?{1 2}--(0 1)????(0 1)10100010000001{0 1}00{1 2 3 4 5 6 7}(1 2)0??10?1011?00?????01000?000000101?00?(0 1){0 1}0?000111?????????????????????????????????0{0 1}0011?0????0????000000000?00?1003?0??10???0?{0 1}-011001?0002101?01????201001(1 2)????001?000?00{0 1}0?00000??(0 1)00?0??200??1{0 1}??{1 2}110100?0??1?01?010000??0000?1????(1 1)



2)0?????1??1????N0?????00?????????1??0?????????????0??00??0?????????????0011?????0??1????  
??0??00??????0??????0????10?????0000??0????00?????????????????????????????????????????0?010?  
????????????????-?????-01-????????????????????????????????????????N?????N?00?????0??(0 1)?000??(0 1)-  
??1-????????????????000120??1

Achillesaurus

????????????????????????????????????????????????????????????????????????????????????????????????  
????????????????????????????(0 1)1??01????????????????????????????????????????????????????????1?0?11-  
2?????????????????????0?????0??1100?0??1?????1?????????????????????????????????????????0?????????  
????????????????10?????????0??00??0?????????0?1  
2)1????????????????????????????????????????????????????????????????????????????????????????{1 2  
3)2?????????1?????0????????????????????1????????????????????????????????????????????????0{1 2}-  
00????????????????????????????????????????????10????????????????????????????????????????????????????  
????????????????????????????????????????????????????????????????????????????????????????00??0??00?????0??{  
1 2}0000??-????-????????????????????1????0

Alnashetri

????????????????????????????????????????????????????????????????????????????????????????????????  
????????????????1????????2?1?????????????????0?????0????????(0 1)????????????12??????????(0  
1)????????????{1 2 3}????{1 2}??11??1?1?000110100??11?????1????????????????????????????????{1  
2}?????????????????1?????????????0?????0?????????????0?????????1  
2)1????????????????????????????????????????????????????????????????????????????????????1?01?0???(2  
3)?0?????????1?????????????????????????????????0?????0????????????????????????????????????1?????????????????0  
?????0?1?????????????????????????0?????1?0?????????????????????????????????????????????????????????0?????  
?????-????????????????-??-????????????????????????????????????????????????????????????000001?0-?01?-  
?????????????????01121??0

Albertonykus

????????????????????????????????????????????????????????????????????????????????????????????????  
????????????????????????????????????????????????????????????????????????????????????????????????  
????????????????????001??0??0?0{2  
3)????????????????????????????????????????????????????????????????????????????????????????????????  
?????????1????????????????????????????????????????????????????????????????????????????????????1????{1 2  
3)?0?????????????????????????0101000?????????000????????????????????????????????????????????????????00  
?????0????????????????????????????????????1?????????????0????????????????????????????????????????????  
????????????????????????????????????????????????????????????????????????????????????????0000??-????-  
?????-?????????0??1???

Ceratonykus

?????????0?-??0?1?00?00??????0??1?11?-  
101?0001?0?0?001110??????????????{1 2}??{1 2}?0??0?1?????????????????????00?0?-  
1????????????????1??????????{2 3}0????00{0  
1}0?????????1?1?????????????????????1?????????????????????????1?????????0??101110?03??????1?????????  
??0?0?????????0?????????????????0?0?????????11?????0??00?000?????????0?0?0?0?????1?????1?1?  
-1?1?1?????2?0?001?????2?????????1?????????????????1?0?11?????0??0??-?????000?0?0  
1)??0?0?????????0?0?1?????0?????1?????????2?10?????????????????????????????0??0?0?0?000?--?????  
-??0?0?0??1?1??10????-?1?????0?????????0??0??0?????1?1?????1?0????????????{0  
1)????00?????0?00?01?????0?????????0????????????????????????????????????????????001?00?0{0 1}-?011-  
??1?????????????00?????

Qiupanykus

????????????????????????????????????????????????????????????????????????????????????????????????  
?????????0?1?-????????120??0?00{0 1}????????????????????????????????????????????????????????2??21-  
2????????????????{1 2}??{1 2}?01??1?(0 1)?1?????110??3??????{1 2}????????????????????{0  
1}?????1????????????????????????????????????????1{0  
1)?????????????????0?????????????????????????????????1????????????????????????????????????????  
1?011?????3{1  
2)0?????1?????????0?????????????????????????0?0?????????1????????????????????????????????????1?????1?????0?  
??1?0?0?????????????????????1?????????0?????????1????????????????????????????????????????????????  
?0?0????????????????????????????????????????????????????????????????????????????????????????00?0?01?0?00?0?????0{1}-  
??11-?????????????????0??????

Albinykus

????????????????????????????????????????????????????????????????????????????????????????????????  
????????????????????????????????????????????????????????????????????????????????????????????????  
?????????????????01?????001111?0300{1 2 3}0001?????????????????????????????????????????????0??0{0  
1}101001?????????????1?????0?????????0?0?????????1????????????????????????????????????????????  
?????????????????????????011100?320?0?????-  
?????????????????????????????1?0????????????????????????????????????????{0  
1)?????????????????00000?0?????????????????????0?0??0?111????????????????????????????????????  
????????????????????????????????????????????????????????????????????????????????????????????????  
1010100000{0 1}-?0?11-?????0?????????101?????

Xixianykus

????????????????????????????????????????????????????????????????????????????????????????????????  
??-?????????????10{0 1}?022010??1?????????????????????????????????????????????????????????0100?111-2020--20{0  
1}2??2?-  
020110000010000111111?30?????1?????????????????0300?????????0?????010010?0?????????????????1  
0?????????0?0?-??-  
0????????0221?????????????????????????????????????21?????????????????????????02100111????32????????-  
?????0?????????????????????00?000?-  
?????????????01?????????????0?2?1000000011000000?1?0?????????0?????0?????10?????????0?????  
?11?????????????????????????????????????010?0?0?0????????????????????????????????????????????  
????????????????0000-01011?0001?01?01000001--????-?????????????????101????01



??????????10????????????????????????????????????????????????????????????(0  
1)????????????????????????????????????????????????????????????????????

**Falcarius** ????1?01?001110{0 1}0?011{0  
1)010????10?????????????000?0????001100000?????0000?0?????????00021100211011101000010(0  
1)001011011101000100(0 1)00???????1101001011010001100000(0 1)0000101101010111-  
200120002111010100000010001000?01?00000000?00?1?????????0?10?1(0 1)021021??02011110000001{1  
2}000??11????1001?000?000?01011111(0 1)01011100??0?1{0  
1}11121?????????1?01??0?1?00????1??10??0221?01??{0 1}011111(0 1)0020000001-10(0  
1}100001102000?10000?000?0?0?0000010?0100?0?1010001101?010110110(0 1)000201?0110111001011000-  
00100010001100?00-?0?0?0?0?10?0?0?1?0021???0?1020?00??000?0??1?00??????0{1 2}0??????0?-00?0???--  
-?0000?010?0?0?0?0?0?0?0?0-0101?1011100?00000000--{0 1}0?000001000000--  
000?0000?1100?0000?00--?011-?0?11?-?0100000101?00000

**Jianchangosaurus**  
?103000N?????????????????????000?00?1?N?0?0?0?0?0000?0?????????0??02100?0{0 1}???001-  
0021000211?-0010?111(0 1)0?001{0 1}000?00000?1?????0?????000N000110?000??NN?0{2 3 4}{0  
1)00?0100?11{1 2}{1 2}01?11-201110001?0100000010?0?????0?????N????0?0?012--?{1 2}??????100(1  
2)0?11?00?02001?0000010?????0{0 1}11?0?00?1001?1{0 1}0000??0?1?{0 1}0110?10?100{0 1}01?1{1  
2}2?00000200?-???1?010100N20000?1????-02{0  
1}1???10?010?0?0?11?001?????????1?1?00?0?0?0?N000?????????0?0?0?00?0?00?0?0?0?0?0?0?0?0?0?0?0?0?  
011?010100?0?0000?0?0000001100?000?11????-?001?????????0?1010?0?????0000-  
0?00?00101NN000?????????0?0?0?0?0?0?0?0?0?0?0?0?0?0?0?0?0?0?0?0?0?0?0?0?0?0?0?0?0?0?0?0?0?0?0?0?  
010?01010?0N????0?0?0?0?0{0 1}{0 1}N0000?0?N0000-00N?00?0{0 1}?????001??-???-?????  
????0????000??

**Beipiaosaurus**  
?00????NNO?????????????????001011???0?N000000?1?0NN?????0??????????0021{0  
1}00010??00?0031000211?000?01?0?0?0?01{0 1}??01{0 1}0?0?0?00{0 1}0?0N?????0  
1}001N0?1?10?00?1NNNO100000(0 1)000?010100?11-20001?0?{0 1}0  
1}0?????0?00?01000??????N0000?0?0?0?002?0111010?0{0 1}00????1?0000200{0  
1}????00001?????11?10?0??0001001??{0 1}00?0?0?1?0?0{  
1}0?0??10?1000?110?21?0?00?010?1?0110101?0N200001?00(0 1)002{1  
2}??010?001110100200?0112?1?1??0?002?1000??1?0?N0000?10?????0???00?0?????0?0?????0?0?????  
????00{1 2}??110??11101?01110?1?1?1?00??10000?0?0?000??1?20?0?111?0?????0?00?0?000-  
000?1NN100?0?0?0?0?0?0?0?0?0?0?0?0?0?0?0?0?0?0?0?0?0?0?0?0?0?0?0?0?0?0?0?0?0?0?0?0?0?0?0?0?0?  
0001010??0N????0?0?0?0?0?0?0?0?0?0?N0000?0?N?000?0?0?0?0?0?0?0?0?0?0?0?0?0?0?0?0?0?0?0?0?0?  
10?????1100?0?0?0?0?0?

**Alxasaurus**  
??????????????????????????????????????????????????????????????????????????????????????2021?0??????????0310102  
110?????????0?00?1100101{1 2}0?01?10010?1?????????0?0?1{0 1}10010??000010(0 1)00?0101?020101?{1 2}11{1  
2}1?1?0?20???????2-?1?0?{0  
1}0??????0000000?000?????????????????10010010?0?01?0?????011?0?100???{1  
2}1?????0?001?1?0?0?0??101110?000100?????0?-????????????1??{2 3}?????????????0??0211(0  
1)21??1010101100?00?11?1?0?0?0?0?201011?10?0?0?0?0?0?0?0?0?0?0?0?0?0?0?0?0?0?0?0?0?0?0?0?0?0?0?  
1?01?110?0?10111?210?-  
??11110?011?1?0?0?0?0?0?0?0?0?0?0?0?0?0?0?0?0?0?0?0?0?0?0?0?0?0?0?0?0?0?0?0?0?0?0?0?0?0?0?0?0?0?0?0?  
?????000??{1 2}0????????????-?0?0?-?01?1?????0?0?0?0?0?0?0?0?0?0?0?0?0?0?0?0?0?0?0?0?0?0?0?0?0?0?  
?0?01????????????????-?11-????1????????????0?0??

**Enigmosaurus**  
????????????????????????????????????????????????????????????????????????????????????????????????????????????????  
????????????????????????????????????????????????????????????????????????????????????????????????????????????  
1)0?100001????????????????????????????????????????????????????????????????????????????????????????????  
????????1?????????0????1?0?1-  
????????11????????????????????????????????????????????????????????????????????????????????????????{1 2}-  
????????????????????????????????????????????000?0?????0?0????????????????????????????????????????????1????????????????1222100?0  
0????????????????????????????????????????????????????????????????????????????????????????????????????????????  
????????????0????????????????????????????????????????????????????????????????????????????????????????00-  
0000?0?0?0?0?0?0?0?0?0?0?0?0?0?0?0?0?0?0?0?0?0?0?0?0?0?0?0?0?0?0?0?0?0?0?0?0?0?0?0?0?0?0?0?0?0?0?

**zheziangensis**  
????????????????????????????????????????????????????????????????????????????????????????????????????????????????  
????????????????????????????????????????????????????????????????????????????????????????????????????????????  
????????????????????????????????????????????0?0?0?0?0?0?0?0?0?0?0?0?0?0?0?0?0?0?0?0?0?0?0?0?0?0?0?0?0?0?0?0?0?0?  
????????????????????0?0?0?0?0?0?0?0?0?0?0?0?0?0?0?0?0?0?0?0?0?0?0?0?0?0?0?0?0?0?0?0?0?0?0?0?0?0?0?0?0?  
????????0?1?0?0?1?0?0?0?0?0?0?0?0?0?0?0?0?0?0?0?0?0?0?0?0?0?0?0?0?0?0?0?0?0?0?0?0?0?0?0?0?0?0?0?0?0?  
????????????????????????????????????????????????????????????????????????????????????????????????????????????  
????????????????????????????????????????????????????????????????????????????????????????????????????????????  
????????????????????????????????????????????????????????????????????????????????????????????????????????????  
????????????1 2}?????????????????????????

**Suzhousaurus**  
????????????????????????????????????????????????????????????????????????????????????????????????????????????  
??1????????????00011?100000{0 1}00????????????0000{0 1}002110????????????????????020101021-  
2011100{0 1}102000{0  
1}02000100????????????????????????????????????????00102??0?010????00001????????????0?????????1  
0?0?0?10?1??110?0-  
????????112????????????????????????????????????????????????010?10?001????????????11????????????220?????0?  
?????0?0?0?001?????????0?0?0?0?0?0?0?0?0?0?0?0?0?0?0?0?0?0?0?0?0?0?0?0?0?0?0?0?0?0?0?0?0?0?0?0?0?  
1}1?12010000010???1222100101110????????1?????????0?0?0?0?1?????21????????????0?????0?0??????  
????????????????????????????????????010?000????????????-?0?10-?01010?0?000-0  
1}01000100????????????????0000-000?0010001????????????????????????????????????????????????????????











??00??1?2000000?000?????????????01????201?1?????????0?????0000?2?N0?????????????????????????--  
-??000?0(0 1)0?????????????????-000000-010??1-?100N0-00001110000010????00????NNN??-  
0??000000000020000?????????????????1????????????000?00

Beibeilong

??100?N?????????????????????11?01?0?N?1202?00?????????????????1??2102?2?0?0??11??1---??-  
?????????????1??????2?1?????????????????????????????????{0 1}??{0  
1)????N?????????????120200??110??1?1?????1??110?????1?????????????????????0?-??0??????{1  
2}?????????????1?0????000?????????????????????????1?112?0?????-??-?00????000?-  
?????10000000??0?1??{1 2 3}?101?200?1????01??-?????{1 2}?1??0?????????????1?0?????????{0  
1}0????0?????1N?0?0?0?????????????????0?????0?0?????0--  
??????N?????????????????0?????0?????000??-  
??00??0????????10?????????1?????????1?????????0?N?????????????????????1????0????0N?????????  
?????????????????????0?????????????????????????N????????NNN?00N?0?????{0  
1}?????????????????????????0?????????????1??

Gigantoraptor

?????????????????????????????????????????????????????????????????????????????????????21121200000?001????-??-  
?????????????????????????????0100011?????????01?0???2000001?000?000??01??11{0  
1}?????????????????101100021?1011010001011001001000?000{0 1}?????????????????1?0{1  
2}??0?????1?011??0?00??{0 1}00000{1 2}??0?00-0000?02?00?0?????-??0?0?0?0?0??0?-  
1?????????????1?23?????????????11?-  
??0?2??1?10??1????0?????????1?0?????1?1?00?1?1?????1?100?????????00?0?1?0?0??1?0?1?1??0-  
?????????010?0??1?0?0??1?????0?1?000?0?0?00?????????0?????????????0?1?11?0?????????0????  
1?10?????????????????????????00--  
?????????????????0?????????????????????0?1?101?0?0??0???0020?0000??0?00?????????11??1?00{1  
2}0?00??-0??-?0????0?????????00??00

Tongtianlong

?10?0??01?????????????????????20?0?101?1?10011202100?01000?0?1?????????????10{1 2}0201?????????1-1-----  
-?12?0??1?0?????????2?0?????{0 1}??1??{1 2  
3}012?00011?2100?????????????????????????????????00100?000{0 1}0{0 1  
2}0??????0?0?????????00100?0?????????000-?010?00??1-0{0 1 2}{0 1}????10?01?????????????{2 3}??0?{1  
2}?????????????00??20??0??-?-?????????0?0-?????????0 1}??{0 1}10?-10????021??102?000100?1?-{1 2}{0  
1}1?021?{0 1}01?????????????????1?0??0??2?00??0?0?1?0?????1????010?1?????????????0?????????????1--  
?????????0?1000001????????????????-?0?????????0?-??00--00?0?????????00?????1?1?00??-  
??00?0??01010?001?????????????0?0?????????????001?{0 1 2}?????????????????0?00?0?0-0?00?1-  
??0?????????0?00????????????????-??0?????????????????00?--??11-?????????100?00?????0?0?

Oviraptor

?1?0?10100?????????????1???10??1?0011???001202?0?111000000?01?0?0??121020201?00??11??1---??-  
??????1?1?????????2?0?????????????????1????210?111?20000??111000000001111??201?{1  
2}?????????????????????????????????????????????????????????0?{0 1}0?10?011?01??{0 1}0??001?{1  
2}01100?0?????????????????001?0000??2?0?????00-??-?1?????0-0?-  
11????0?00010?10?1??211??2?100101?1?-?0??020-  
10111?1000200?1000?????????0?2?0?00?00?111????10??0000?0?0?11?0?0?????0?????0?-  
00?????0010????10????0?0?????????????????????--??00?0?0-  
??11?0?0??10??1?1????????1000??0?101??0?1?0?0??10??000-?11?????????00?????0??????????{1 2 3 4  
5}??010-?????-??000????00?????????0?00????{0  
1}2000??1?000?????0?0????????????????????????0010111????0?0?

Banji

?1100-1NN01?????????????????{1 2}0?1?????1??NN?120{1  
2}????0N100?0?????11?0????21020201?10??11-1-----?  
????????????????????????????????????????????????????????????????????????????????????????  
????????????????????????????????????001-001?0?????2-  
?????????????????????????????????????????0?0?0??2??????-?-??????0--?????0-1001?0-10?????11-  
1N2111?10??1?-  
?????????????????????????????????????????????????????????1?N????01?????????????????????????1?0--  
?????????????????????????????????????????????????????????--??10--?0?-?????????????????1?????--  
?110??????1??100?????????1????0?????1?0?{1  
2}?????1????????????????????????????????????????????????????????????????????????????????  
?????????????????????????????????????????????????????0?

Yulong

?111011NN0?????????0?????1101?10????0NN012021?0?1NN00000?1??11?????21020201?0020111-1-----  
?-?????0?00?????2?????????0?????{0 1}{1 2}?????????????1?N?0200?21????N?000000(0  
1)100?020?0?????????????????0?????????????00?0?0???N?0N?0100{1 2}0??1001-001001100?2-?????{0  
1}?????1?0????00????03?????{0 1}?????0?000?000{0 1}2?0?0??-??-??0???0000--??0?110010211?-1001?1{2  
3}0101N2111010?11--?????????1?10?????0{0 1}0?00{0 1}{0  
1}1?0?100??2100?000?????1?N?11000010??1????01?????100?0?0?0?0--  
?????????1?0??0?0?????0?0?????????1?????0?0??-??10--00?0?????????10??1?1??0??-  
?1?0?0?0?1?2NN001?????????1?????0??1?????????0N?????1????????????N?????????????????1N?????  
0?0?0??{0 1}??N?????????????????????????0?????2000??{0 1}????01?????????????????0?0??00?

Huanansaurus ?1100-1011?????????????????1  
2}011?100?000?1202?????111000?0011?010????121020201?00??11-1-----?  
?01?1??10?????????????????????????1?????????????2100?????????0000000111????????????????  
?????????????0?????{0 1}??{0 1 2}?????00100{0 1}-00?0??10??2-?????????????1  
2}??110?????????10?0??2?????10?000??2?0?????-?-??0???00-0-?????-0-1001??-10?1??{2 3}11-  
1?2111?101?1-2?????????1????01?1{0 1}00010?????1????0{1  
2}00?0?0?????1111?10?1?10?????????????????00?0?????1?0-0?????????1  
2}?????1??10????????????????????????-??10--0?-??0?10??0?0?0?1-10?100?-?100?0??????2{1

2)000?????????????0??1?0?0?0??000?????????0?????????????????????????????????????1?0?????????0?????0  
0????0????????????????????????????????????01-?????????0?????????????????????

Wulatelong ?11????010???????????????????  
2)?11?0101?00??120?????????000?0?1????????????1?????1?????11-1?????????--????????????1?2????{1  
2)?00??0(0 1)?1?????010?????1(0 1)?1?(0 1)??????00?0(0 1)?0(0 1)0010?2100??1????1(0 1)?0?1  
2)???2?12?2?0?????01?????????????00??1????002000-??20??????(1 2)?0(0 1)????(0 1)?????{1  
2)?2?000000?????00?????????0?0?0?010?????????????????0????00-0?-1??????(0 1)?011?-  
?0?????1?????2?1????0??-?0??????10?????????0(0 1)?10??0-1?0?10??2{1  
2)?0????0??11????0??00????????????0?????????????????????0??0??????????????(0  
1)?1????0?????????0??-??1?-0??-  
??????????020?111?0??????0?????010????0?????????????0?????????????????0??(1 2)?0??0?0-  
??0??0????0?0?0-?01?????????????????????????????????????00????0?0?0????????????0??-?01-  
????????0????????0???????

Corythoraptor  
?11????01????????????????10111????????????0?????????????????????????????????2?02?20??0????1-1-----?-  
1??1????0001??(1 2)???020?0??????(0 1)?0????????????2(0 1)?0????00?000000(0 1)0111????11?{0  
1)?0?{1 2)?0?2(1 2)?1101?00?2-01?0?1?0?????????10?0(0 1)?0{1 2)0001001-??(1 2)?0?????2-  
????????????110110001?0?11000?1?????01??100??(0 1)????0??-0-?0?001(0 2)0000-111-????1?01??-  
1??1???31??????11?0?0?0?-2??????(0 1)?1?100?0000100{1 2)-10010?00220?00??1?1????(0  
1)1?00??1????10?0????????????0000??20-1?????????????0?0?0?0?0001?1????00??-????-??-  
?????????????0?0?101100??-?0??(0 1)?01?2{1 2)0001?????????????????????--  
?010????0????0?????????????????????1?????1?0????0??????(0 1)?{0  
1)?00000?0?0?0?0?1?00001????????00--?011-1?????????????????100?

NXMV  
?????????????????????????????????1?????1????????????????????????????????2101?2?1?00?011????-????-  
????????????00?012?0????????????????????????????????????????????????????????????????????????  
????????????????????????????????????????????????????????2?01????????????????????????????????????  
????2?0?????????????????????0?????????????????0?1??(1 2)?????2?1????0?01?-{1  
2)01????????????????????????????????????????????????????????10?1????????????????????????-  
?00?0?????????????????????????????????????????????????????????????????????????????1?????0????0????  
?0????????????1?????????????????????01??10????????????????????????????????????????????????  
????????????????????????????????????????????????????????????????????????????????????

Nomingia  
????????????????????????????????????????????????????????????????????????????????????????????  
??1?????1?1?00010?210312000?001120-?????????????????????????????????????????????0102001111001110002{1  
2}1100?001{1  
2)?11100100010?00?????????????????????????????????????010000?????1?????000011????????????10?????????1(0  
1)?????????0?0?0?0?10?????????02?1?????????????11????????????????????????20(0  
1)0?????????????????????1-1?????????1?????0?0?????01?0?0?????????????????0?01?0?0????????(0  
1)01(0  
1)000?????????????????00110010100?1?0000?01?0?0????????0????????0?????20????????????0????0?0?????  
?????????????????????????????????????03010000010????????????????????????????????????????????  
????0000-00000?001?00200?1????????????0?????????????????0????00

Rinchenia ?1121100101?01?-?100-2-  
?01?101110001000001202100?111000000100110000112102020100020111-1-----1-  
101100110001012?0102000100001001?110102100011011000???100??(0 1 2)?0??0(0  
1)?1?01020011110?????????????????01101000?0?????0?00?01?0?00?000-000001?002-  
01?0?0??10100?????001?????0??(1 2)????0??100?00102000?????-0-?00????00-0-?1?2?0?1?011?-  
1001?131????020110101?11-(1 2)0 1)10?21-0  
1)010?????????00??1?1??1?00??201?0?01?1?111001100000??1?????????0?01?0??????10--  
?1?0?0?010000000?????001210?????1?1????0?1?-0?00-000-(0 1)?11010?00?111?11?????-?  
00?00??10(1 2 3)000010001-211?????0?0110010-00?003010?00??-????????-0????-?0101-  
??000??0?00?00?0?2(0 1)?????????00?0?0000?00?1?????????-??1-?00????0?????????0?0?1??

Nankangia  
????????????????????????????????????????????????????????????????????????????????????????2?020?0??????????-????-  
?????????????????0?2?0?120?00?????????????00?11?00100?????????????????????0102010(0 1)11011110002{1  
2}1201?00?1101?100?000111?00????????????????????????????????????2?010??(0  
1)???1011????01000?????????????1?????0?1021?0??????(0 1)?-  
?1??10????0???1221???????????????3?????????????0?0?-?01??21-10?????????????????101??????????(0  
1)?????1?????1?0?0?001?????????0?00?0?0?????0-?0000??1010010?10?????0(0 1)?2010-  
100?0?0?0?01?00????????0?????1?????21?1?????0?0?0?0?0?000?????????????????????---  
?????0000?????????????-00??-0101?1-?0?00?000?????????????????????100-  
0000?0????0?02???1?????????????????????????????????010?01

IVPPV9608  
????????????????????????????????????????????????????????????????????????????????????????  
????????????????????????????????????????????????????????????????????????????????????{0  
1)?????????000??11?21?????????????????????????????????????????????001????????????  
??????????????(0  
1)?01100?????????0????10?????1?????????????0????????????????????????????????????????  
?????????{1 2)???2??00??1?0010?????1?????????????00?00??1?????????????????????{1  
2)?????0?????????????????????1?????????0????????????????????????????????????????  
?????????????00?????{1 2  
3)??????????????????????????????????????????????????????????????1????????????????????  
?0?0??(0 1)?0????????????????????????????????????????????????????????????  
IGM10022 ?11(0 2)1110101?11?-0000-2-21102011110?11?000(0  
1)1202000?111000001100110000012102020100020111-1-----1-

1011101100010121011200010000100111?01011001110110000??10000000001110102101{1  
2}1110201000111101100?2-0101000000001000000100?0001001-00100010?02-010?(0  
2)010010111110001000?20000?1??00001000001121000000-0--110?10010-0--11221101100110-100100311{0  
1}102111(0 1)101011--2010021-  
10111010012000000101001100?02101000110111101110000000100?0?????0000?000{0 1}0?00--  
?00000010010000010????000012100-00001100000?01-00?00--000-??00?000?00021?11?110110-  
0100000?00101100010?01-2110??000-0110?10--0000?3010?0?0-?0?00010-00?00-??0111-  
1?0000?00?0?0?00??0{0 1}0000--000?00000?000?1000?000--?01--0?1??0110100010010?001

Citipati

?111(0 1)11010100?1-0000-2-  
2?10201110111?00011202100?11100000?110010000012102020100010111-1-----?-1?1????1?{0  
2}?1??2100????0?000100(0 1)11?010210?11?0(1 2)10100??100100000001110{0 1}02011?111?1?100?1(0  
1)11??00{0 1}?211011001?0????01100011010001000-00100010002-1????01001?1101(0 1)10000?0110?(0  
1)002????0010?000112?000000?0--?00010000-0--1122?100100110-1011103110102111101011--20?002?-  
00001??0?(0 1)(0 1)00(0 1)(0 1)00(0 1)-1?00100002{0 1}000000111?1110(0  
1)110?0000??1?0?011?0?0?0??0010010--??0000?(0 1)01000(0 1)000??00?0{0 1}{1 2}00?-1??????010?0?-  
00-00--000-10?0100?0000211?11110(0 1)00-?1000000010(1 2)000010001-2110--0000-0?10010---  
000?030?00?010-0011?010-00?01?-??0?1-??0000-00?000?00??1?0?00?0??0100?0-  
?00000000000000?00?00?--0000-?001??01101(0 1)0011??00??

Anomalipes

????????????????????????????????????????????????????????????????????????????????????????  
????????????????????????????????????????????????????????????????????????????????????????  
????????{1  
2}001?????010?0?00?01?????0????????????????????????????????????????????????????????????  
????????????????????????????????????????????????????????????????????????????????????????  
????????2?0?????10????????????????????????????????????????????????????????????????????????  
11?0?0??1?0?0????????????????????????????????????????????????????????????????????????  
????????????????????????????????????????????????????????????????????????????????????????  
????-0????????????????????????????????????????????????????????????????????????????????????

Shixinggia

????????????????????????????????????????????????????????????????????????????????????????  
????????????????????2?3120?00????????????????????????????????????????????????????????????  
2??0????????????1000000?0?0????????????????????????????????????????????????????????????  
????????????????10????????????????????????????????????????????????????????????????????????  
????????????????0?0?0????????????????????????????????????????????????????????????????????  
?????0{0 1}11--  
????????00????????????????????????????????????????????????????????????????????????????????  
????????????????????????????????????????????????????????????????????????????????????????  
?000?0?0????????????????????????????????????????????????????????????????????????????????

Khaan

?111110101??1?000??2?10201110011?00011202100?11101000?1010100?0??21020201?00?0111-1-----1-  
10101??10?(0 2)101210??20?0?00010?(0 1)11101?110011111000??100010000111011010200111001010001{1  
2}1101000011010100?000000100000010020001001-00100011??2-020?(0 1)0110101(0 1)01110000001000(0 1)0(1  
2)?????00100000102000?00??-0--?1001000--0--1(0 1)121100100110-1011?1(2 3)1101020110101?11--2110020-  
10111010001000(0 1)(0 1)00-1000100002201?001?0110?10(0 1)110(0 1)0000?100010111?00?01?000?100?0--  
?0000000101000?01001?00?0?000-00(0 1)110?00?0?01-00?00--000-??11000?000101?1110000?-  
010000?00010100001?01????????000-00?01{1 2}0---?00??30?00?0-0-0????0010-00??0-1?1?0-  
00?00?00??1{0 1}00000?110000--000?00?000100001000000--?001--?0??1?0?1010(0 1)0000?00000

Conchoraptor

?1101-10101????-0?0-2-(1  
2)110101110011?00011202100?11100000010111?000112102020101020111-1-----1-10101?1100?1012?0{2  
3}120?01?0?0100011?0?01100(0 1)1?021010?0?10001000?10001000 1}01(0 1)11100102010{1 2}111010100011110?00{0  
1}??11010100{0 1}000?0000?0000{0 1}00?0002000-00100011002-0??2{0 1}?????1?0  
1)11000?1000??000?1?????0?100000112?0?00000-0--?00?10000-0--1122?-0-10011?-100110311-002011(0  
1)101?11--2??0?0??0{0 1}?1110?0?0(0 1)0100000?1?0?10??21010?00??011011(0  
1)000000????????????????????0?0100?0 1}0010--??0000?000?0000000?0?0??0000000?0?0??00--000-  
1001100?0000100?1??00?--?110?0?0?010(1 2)000010001-2110-??000-0110?0--?000??0????{1 2}?-  
?????000-????????00?????00?0?0?1?00--??{0 1}0000?0?0000--?00?00000000000?00?000--?001-?01?1?-  
00?01000?0??01??

Jiangxisaurus

????????N?0?0??-??-2-  
????????1?10????N??12?????????????????????????????????????????1?0201?0?????1-1-----?-????1??0?????{1  
2}????????0?0????0?11?N1?{0 1}10?N1??211?{0  
1}0?0?N?1?00??1????????1????????????????????????????????????????????????????????????????  
2?-?1??10110?0{1 2}?10????????????????????????011??????20?0?????-?0????????0--?????????????  
?0?1?1{2 3}?????2??1?0?0?1?-(1  
2)?00?0?01????1????00????????????????????1?0?0????11N1????????????????????????????????????  
1??????0?2?0?0????00????????????????????????????????????????????????????????????????????  
??10?0?N????1N?0????????????????????0?0????????0?0-??2?000?00?0?0-  
0101?1????????????0?0??-????N?00?0?0????????????????????????????????????????????????????  
-?0?10?0?0?0????

Nemegtomaia

?1000-10101-00?-1100-2-0??1011100111000(0  
1)1201100?11100?0?01011110001121020201000?0111-1-----?-10110110000??21312????????????(0  
1)????????????????101????10001(0 1)012?1111?01020?01110????{0 2}0??{1  
2}?????11????????????????????????0?0?001-0010000?12-?{1 2}0?0?????1?01?????0?????1??{1  
2}?????0010000112?0?0????-0-?????00-0--1?22?-0-200110-1001??{2 3}11-1020110101?11--  
211?????1?01?1000001000?1?1?????0?0{1 2}010?0?0?111(0 1)?1000100?????????????0?0?0?0?????0?00--  
0????00?0????00?0?1?0000{1 2}??00?0?0?????????0-??-00--100-1?????0?0?????1?????--  
?100?0??0102100010?01-21?0??000-01100{0 1}0--

??000??10??0????????????????????????????????????????????????????????????1001110????2?0000??(0 1){0 1}0000?-  
??010????????????????????????????????????????????????????????????0????????????????0??

Heyuannia

????????0????????????????????????????11?10?1????001?0?????1?200100?1?111?????21120201000?011??1---??--  
???1011101?0(0 2)00?12?03020?0?20011??11?0?1?110?111?1100110?11100(0 1 2)00{1 2}?1{1  
2}00?010201121110101000111101000?1101000000???00?010000100(0 1)0001?0????????????2?0?00?{0  
1}?1??1100??000?0?01?0?01?????01100001102100?0?????-??0010????-?10?21????????-  
10?10?3?????2?11?01??1--21?002??100010100?001011?0-1?0?10?002{1  
2}01?00?0?1?0?011000?11?0?1100?0010?0?0?10?0?????0-?0?????1010000?1???10000?1???-  
?00??1?0010?????0???-0???????1?????110??111000?????0?0?0?10?01{1 2}00????????????21????--  
-?0?1?1?????0?-0-?????010-?????-010001-??010??0?0?0?00--{0 1}0{0 1}?0000000{0 1}0000--  
?0000?00?????????0??--?20{0 1}-?????-0?101000?0?0?0?0?

yanshini

?11?0?0010????????????1110101111??1?1?0001?22100?111?0000?10011??????2102020100020111-1-----?-  
1010111(0 1)(0 1)????2??(2 3)(1 2)10?01?0001001??1(0 1)10110001100100000?11020000(0 1)10110102001{1  
2}11010100011110100011(0 1)01110(0 1)0000001101000000?00010?{0 1}-0{0 1}0001?002-  
???000?10?0110121000000010000?11????00110000?11210000000-0-1100100??0--10221?0???????-  
???1003?????????????11--2?0021-101110100000100101-100110000210110(0 1)?0110?10(0  
1)1?0?0?000?0001?011?00001?00001????-???????010010000100000011000-00011100010001-00??--  
??0??0?000??010121?10011?-?-??000?0?0?1?00?????????????????11??-?000???????-?  
??1?00000-?0?000-010100-100000-001011000--??{0 1}?0100?010000--000?0?000?0000000?0?00--0011-00????-  
??10(0 1)00010000??0

Scansoriopteryx

???????NNO?????????????????????10?1?1NN?????1?01?N100100????????????200?0100010?000???N1{0  
1}-2?1?????????0?2?0?{0 1}??0{0 1}0001?00{1 2}11??N?????111N11?200100?11NN100000001100122{1  
2}0?2?1200{0 1}-210?0111?1?0?010000?0?00010NNNN000?0300?1?????0?1?1??1-  
010012??011300110000000?30?1001?10?0?00-021??100?0?1?0?????1?0--  
0??01?1?21???????1?10?????1?????2?1101?01?0(0 1)111?10-001(0  
1)1010002N010002?1?0?1001021000010100??0?0000?0?0?0000?0?0?00011?0?????1??????N?00?00?  
??1-?00010?-??-101??1??0?0?10?00?00?0?0?????00?0?010??1?0020?0?0?0??-  
00?11???????????????000-??0?2?????0N2??010?010?0????????-??0?0?0?00?1-?100N??{0  
1}0??1?100??{0 1}?{0 1}?N00000100NNN-??N0?0?1?{1 2}?{0 1}0?0000?0-??10-00?????0?????0????00?1?

Yi

?00????01????????????????????2????????????0????????????????????????????????12?2??00?1000?201--  
02?????????0????????????????????????1??????1?????2?0?0?????0000001?1?0?????????????????  
?????????????????0?????????????{0 1}?????1003?00??1??1-  
?????????????301100?????????????1????00??110??{0 1}1?1?????1?????????0-  
1}1?1?????0000?01?1??{2  
3}01?????0?00?00?2?2?????1??1?00020000?0?????1????3?000?1?1?1?????0?????1?????????  
??????1????0?????????????1?0?????0?????????????????0?0?????0?????  
????????????????1??????????????????{1  
2}??000?????????????????????0?????????0?????????????????0?1????1?0?????0?????????  
?000?1{0 1}0?????????????????????0????????????????????????????????????????

Epidixpteryx

-10????N?????????????????????{1 2}?????1?????NN?00{1  
2}??0??N0??0?????????????012??00{0 1}0?010000201--121??(0 1)0?????????0??{0  
1}200?0?1????03??1NN??{1 2 3}N1?01?NO?0?{0 1}?0?0??N20{0 1}1?01(0 1){0 1}22??1?2??001--2?0{0  
1}0011?1?????0?????010?N?NN?0?0?0??10010?0?0?1????1-0(1 2)(0 1)0(0 1 2)(0  
1)?20?2?1????0??00????????11?0?????11-0 1}1100?????0??0?1??-000-  
012??2?1????00?0?0?1N110?0?200110?????00?11?11?0?11?????2?0?0?0{0  
1}2?1?0?13?00?10?0?0?0?N?000?????1?????0?0?0?0?0?1?0?0?0?0?0?0?0?0?0?0?0?0?0?0?0?0?0?0?  
0-?00?1?000?0?1?000?0?0?-????-?0?0?0?0?0?1?1????00?10??-  
00?11??200?????????0?????0?????????N?0?0?0?0?0?0?0?0?0?0?0?0?0?0?0?0?0?0?0?0?0?0?0?0?0?  
??000?????????10101?????N0?????NNN-??N0?0?????????1??-???-??????0?????????0????0

Pedopenna

????????????????????????????????????????????????????????????????????????????????????????  
????????????????????????????????????????????????????????????????????????????????????????  
?????????????????010?0?1??{0 1}??{1  
2}0020001????????????????????????????????????????300?001?111?????????????????1?????????0?????  
??????1?????????????????????????????????????????1????????????????????{0  
1}?10?0?3?0?0?0?????????????????????????????????????1?????????????????????????????????  
?????????????????????????????????????????0?0?10?????????????????????????????????????  
?????????????????????????????????????????????????????????????????????????????????????00{1  
2}??10?0--??-??-??0?0?????????????

Caihong

0103?11010????????????????1?0?00????00??22?2?????0?1?????????????{0 1}0110?00?{0 1}0?00000(0  
1)10101?????????????????{0 1}00?????1????111?0000--??1??{0 1}?2{0 1}0?0???00?000?000?0{1  
2}12??1?????00?200?3?11112??2??1?????????????1?0{1  
2}00?100300?10?????0?021?02?00?1?011?01??0?30?10??1111?000?00?0?0?0?0?0?0?0?0?0?0?000111  
1?2??0000200?000?001011?02000?00?00110{1 2}101?1?20011?000102{0  
1}01?02121?0110?00300?0001?0?00?000?01?????????0-  
????0?????0?????????????????01?00??{0 1}??0-?1?????????0?0?0?0?  
??0?????????????1?01?1?00101??-00?0200000?0?????????0?????????---?0??{0 1 2}?000?0-0----?--  
?0?-?0?0?0-0?00?????0?????????????{0 1}0000?1{0 1}???--  
????0?????????????????1?0?0?????0?0?????0?10?

Serikomnis

0?????0????????????????????{0  
1}????????????????????0?10?1?????????0?021{0 1}--(0 1)12????????????????{0









2)211?002011?0101?1110?001{0 1}?001000110020111????????1110111?0000???10000?00000{0  
1)00001?211011001-22000311121(1 2)?0?111100000100101?(0 1)0000110????1011020100?(0 1)000111-  
021102?0101?01????1010101000?1????000?100001110000{0  
1)00?000000102100100011?122100000200001001?1201000200010110010021(0 1)?21-10101????????000?2-  
110111??030010?001?0100010000?0?0011010002??1?001?001000000?00000001?0??110?111?1010120?010  
0001?000?0?0020?-100?1000100?10110?0101?1?1100?00101?0???000300000000?00000?-0000-00100?0---  
?0000{0 1 2}0100?01?0????????-000000-  
0100010??100????00?1????????0?????00000010?00000100000000?0?0--?011-000100100??????0000?001  
Jianianhualong                      ??0{1 2 3}1?00100????????????????????000?1?001?20{1  
2)?000011??????????1?0??{0 1}0010010021?1?????01{1 2}11?002?????1????0?????0?0??0?11??{1 2}011(0  
1)000?---?1?01??20000??110010000001000??????????1-200?3{1 2}1{1  
2)?1?0????0????0????????00001?020??1????-?0?1?1??1-0{2 3}1??2?0??1?011001?101?1?0?10??110?(0  
1)00?0?0??01?0?0?????000?{1 2}10?00?01111?00000{0  
1}010?1??1?12010002001?0??00?0211?11?1011?1?00?2001112?-1?0?101002?0??0001?0?0???(0  
1)?00?000????????????0?-  
1??0????????0????????????????????0??010??0??0????????????01?0?0??0?1?????????1?1??1?0?000  
00?-0?0?-00001?0????0????????????????????0????-?0?0??0????0----?--0?0-00??00-  
??0?????1?0????????????????{0 1}?0000?01{0 1}00?000??0?0????????????0?0--?11-  
?0?????01????????000??  
IGM100140  
????????????????????????????????????????????????????????????????????????????????????????  
????????????????????????????????????????????????????????????????????????????????????????  
????????????????????????????????????????????????????????????????????????????????????????  
2)??????01000?????10????021????10????10????????????????????????????????????????????  
????????????????????????????????????????????????????????????????????????????????????  
????????????????????????????????????????????????????????????????????????????????????  
????1????????????????????????????????????????????????????????????????????????????????  
????{0 1}?0000?0?{0 1}?0????????????????????????????011-00??1????????01????0??  
IGM100972\_100974                      ?002100NN??1-0001-11111011010010??1??N102021-  
00?????????1?1001100000010000?1????0?0N11--  
0020????????????????????????????????????????????????????????????????????????????????  
????????????????????????????????????????????????????????????????????????????????  
????????????????????????????????????????????????????????????????????????????????  
0100N210{0  
1)1??10??0????????????????????????????????????????????????????????????????????????  
0??0?0????????????????????????????????????????????????????????????????????????????  
0????????00?000?0001?0??-0?????1?0?0??-  
?N????????????????????????????????????????????????????????????????????????????  
??????????110????????????????0??  
Almas  
?002010NN0?0??11????011????1100?11?1?N01?202?0?1?1001????1?0?0??0?00?0?2??0?000021{1 2}-  
-0020????????????????????????{0 1}?1{1 2}?1????1????????????????????????????????11{1 2}????{0  
1}????01?20002{1 2}{1 2}{1 2}001??{1 2}1?1010?00??1?N1?N??20?????11030-100?1????{0 1}-????{1  
2}?????0?0????0?00?????0?0?????????1?0?1?0?0?????0{0  
1}11??010010?11??1?10000100?010????1010002000101?0?00????????????????????????-  
11011????3?????01????00????000????????????????????????????????????????????????????  
00?????0?0?0?10?-10??-0?0??-?????0?????????????0-01?0?001?NN000??0?0?0-00?????0?0?--  
?0N?????????0????????????????????????????????????????????????????????????????NNN--  
?????00100?????01?0??-????????1????10????????????0?  
Jinfengopteryx                      ?0?3?000????????????????{1  
2)?????0?????????0??102100??01????1?????0?????0?101?0??1?10?000211--(0  
1)020??1??????????0?????????1?0212110001---?11111?200?{0 1}??10000100000{0 1}000?1{1  
2}??1?????0?2?0??11??10?????????0??????????{0 1}??{0 1 2}0?0010021-00??11?0-0?(0  
1)?22?001?2011?0?0101?????{1 2}110?1011?{0 1}?????0?0????????0?10??1?00-  
0121?????001000?0??1101101000?00?10??0?00?(0 1)?1?21-0011???0002{0 1}000121?1?0?1????0{2  
3}?????0?1?1?0?0??000????????????????1?--  
?0????1?????0?1?????????01?00??1????0????????1?????????0????1?????0??00-  
????????0????????1?01????0-0????-000?100?00?0?0????0?????????????--?0?01?0?0?1-0---?--??-  
000?0?-00010?-??000????????????{0 1}?0000?0{0 1}0000?????0?0????????????1?????????  
?0?????0?0????0????  
Liaoningvenator                      ??0200101-0????1????0000??11{1 2}0?01010?1?00????2{1 2}0-  
00011??10??110????0?000000010?{1  
2}0?????0112100020?00111?00001?0?0?????1?020????????????111011121010????????0000?0{0  
1}1??010211????{0 1}?121?0?{1 2 3}{1 2}11????1?01100?0??0??0??1?00??100????11?2?0?1-10??0-03(0  
1)?02??0001?01{0 1}?0?0-?0?11?00?????????0?????1001?0?0?00001?11{1 2}010??012?0?{1  
2}1000?0?0??1??1?101002?010?1?0??0211?2?11010????00?20000?{1 2}1-  
1?011??03100?0000?1?00??1?00?10??1????1????????0????0?????????0001?01?110?0?0?0010?(0  
1)??-????????10?0?200?00????0?????0?0??02-  
101??100?00101?00?00?01?0000?0?0????????????????????100?1?000?0?0??????????-?1?0?-  
??01010????????0?????0????0?0????0000?-??00?0??1?1?????0?0?--??{0 1}-  
?????0?10?????10?001??  
IGM1001128                      ?1030010??0-10?1-100011110?00101?01100010202010??11--  
1010000000????0000000{0 1}0?11?0000?0232--  
0220????????????????????0??011?020?1????????????????????1001000?0100011??2?11{1 2}11?{0  
1}01100?{2 3}1112121?1?0001????????1?00120020?02102?010?011?0-  
????02????002100?10?000111??1?????010010{0 1}0011?0?0?100????{0

























1)01?00001{0 1}???(1 2 3 4 5){0 1}010?000?0101????1?11??????10001????????????????000-  
????0?000?????1????100011?10-?-??0?0?101110-??0?0?0?

LP 4450 IEI ?1?---

NN0??????-??????0????10?1?0NN?0202??0?0??011010????????????00?00?20?1000?0N01--  
0120??1?1?????02????????????????????????1?????2?1?N2-1?{0  
1}0?0??N1?0?000?0000????????????????????????????????????????????????????????1030-  
?10??11??{0 1}-??????1?0?0?10?0????????????????????1????00?0?00?0-00?????1????????11?111????-0-  
01201?01????1{0 1}0--  
??2101101??0?002??1????11??10100N0?11??????????????10?00?0????????00?01??1??1????????????  
??????0?0?0?????001?10??????10????????????????????????1???-0??-?????--????????-??????-0?-  
01????1??02?00????????????0?????0?????1?0????????????????????0?00?0?0?0?10?00????N??0??1?  
00?????N00??1?0????????????????????????????????????????????????????????1?00?0?0?????1??

Concornis

1????????????????????????????????????????????????????????????????????????????????????????????  
??-????????????????00?0?{0 1}0?0?0?0????????1?21?2?1?02??210?0?1??1?0?00?????????????????20?--  
21211{1 2 3}????10??2100?????1?1110?00030?0{0 1}????????????????030?1?1101?3010?????0?0?0?1-  
1{1 2}??11????0??????{0 1}?-??0?????0?0?0--  
????????????????????????????????????????????????????????211121-2?1???100?011?????  
1000101??3?0?000????0????????0????1?0??????????{1  
2}????0?0?????????????????1?0?0?000?10?????0?0?0????00????????????????????????????????1?0?0?????1?0  
0??0?0??1????0??{1  
2}????????????????????????????????????????111????0?0?1?01010001?00100?00?110?0102????0??1121??  
10????1?0??0?????????00?1?0?00??10?000?10-?????1?100110?0?0?????

Cruralispennia

1?0????0????????????????????????????????????????????????????????????????????????????????????  
10????????????????????????????????????--3?-??1?{2 3}1????02??200?0?????0?????1????????1?????21?--  
2?3?1{1 2}1{2 3}20????1???11????????1111??0?0{2 3}010{0 1}103????????????1??(2 3)1??-?01?2?{0  
1}0?????0?{2 3}0?1?2?1100-01????????{0 1}-?????????0?0??--?11??{1  
2}12????????0?0?????1110?0?2100?????????1?11?11-??10?????0{0 1}1?????-1?0?1??1?3?0{0 1}100-  
?0????????0?????10?1????000????????-??00?1?1?????01?0?000????0?????0-0?????000?????  
?????????1?????0?????01?0????????????10??2?0?0????????????????????????--??0????1??110{1  
2}?????1????01??0?0?1?0?1?0?0?????????????????0 1}?????00?-????????????????????0?0????2{0 1}-  
?-????????????-?????1?

Bohaiornis

?10---

0????????????????????0?0?01?1?00??2021?0????????????????????????????????11000-?20?00000201--  
0120??1????????????????020?0?0?0?--3?-111?{2 3}1?201?02-120010?1111003000-01?0-022??1?2????201--202{1  
2}12?1121????1?001{1 2}00?01?1110?0?0200001030-?1????1?0-?200{0 1}-1101?3010--1100?30?1-12?11??-  
00-?210?-?0-?0?0????(0 1)000?0--?(0 1)(0 1)?31211{1 2}??1-0-01200?0?-??1110--00210110??0-10022??1(1 2)1-  
211(0 1)1?10(0 1)00211(0 1)(0 1)-2-1?0?1110-210{0 1}000-00?0?NN?-0????111??1????0002?0?1???-  
????0?0?????????0?1?1?000??101?{0 1}2??0-??1?1?100????(0 1)1?-?0?0?0?0?1?????1?00?0?-0110?0?-(0  
1)0-011??1?00210001????????11????????????000----?02??111??00000?12?1000001?00001-  
?00001?010102??1?1?10??1?2-000(0 1)101?00??-1?10?0001????0?0????(0 1)10?00(0 1){0 1}1 2}1-0-  
????0?0001?0-00?0?100

Parabohaiornis

?0?---

N????????????????????0????????N?0202??0?0????????????????????????11000-??0????010201--012?-  
????????0????{0 2}1?0?021?0?200--3?-1110{1 2}1?2?1?N2?12{0 1}000???1NN003000-0100-021??102????201--  
2?2{1 2}0{1 2 3}121210????1?011?00101011NN010?0{2 3}00011031-?{1 2}??1????0-?(1 2)10(1 2)-1101?3010---  
0?100?30?1-120????-00??210?-?0-?0?0?1??0(0 1)0??0--211?3?2112?1-0-01?0?0????1110--0N210010?0?-  
?00221?11-2?11?1010010110-2-1?0?1110-2{1 2}000000-00?0????0-0?????1?0?1?????01?1?0?????1?  
????01?????0001?10?00????0101{0 1}2??0-10??1?1000?0?00-?0?0????????????????1?0020?-?(0 1)100(0 1)?-  
?0-011?N10??2?N001????????????????????????----?N?021110N0000??1401000?01?00000?100?110?N0-  
101011000????20N001111{0 1}NNN-??0?10?0?01?0011??0?10?001010??-??1?0?01110-000?0000

Longunguis

?10---

????????????????????1?1?1?N????0?1????????????????????????????11000-?{0 1}0????00020{1 2}--0020-  
????????????2?1?0?0?{2 3}??01??--3?-??1?{1 2 3}1?201?N2?120000????1NN103000-11?0-????10????20{0  
1}??{0 2}2??{1 2 3}12?2?2-210?011?0?011N1NN010?0{1 2}000{0 1}1031-?1??????0-?2(0 1)??-?10103?10--  
?????0?30?1??2?11?0-00??210??{0 1}0-?0?0????(0 1)0?000??1103?21?2-1-0-01?0?0????11110--0N2?0????0-  
?00{1 2}1?111-211(0 1)1?10(0 1)001?111-??1?0?1?1?-2?010101-00?0?0??-0?????1??1?????01?1????????-  
????0?0?00?0?1011?11000????0010?????-1??1????0?0?0-0-?????0?????????1?0????-0110?0?-?0-  
??????10?02{1 2}N001?????????????????0?00----??021?1?0000?????0  
1}00?0?1?00?1??110001?00N??0?0?0?0?0??21N001?1?{0 1}0?NN-??????0?10?00?20?00?0?0?????1?0-  
??1????????-01?0?01?

Shenqiornis

?1?---

NN0????1????????????0?0?1????N????2?1?0?0????????1010?00?????????11000-?????0000201--  
0210????0?01?1?2??1????{1 2 3 4 5 6 7}????0?0?????1?1?{2 3}1?2?1?N2??210?0?1?NN?02000-(0 1)100-  
?????1??????21--21220{1 2 3}12?(1 2)10????????????010?N1NN?0?0?0{2 3}0??{0 1}1030-?{1 2}0?1??0?0-  
031??110?3?{1 2}0--????0?30?????11?0?00?02?0????0-00000?1?{0 1}0????--?11-1{2 3}111?2?1-0-  
0100?0?1?1?110-0?21?1?011??000{1 2}1?1?21?2110?10021111-?-??0?1?1?-2  
3}00?000?00?0??N?0?000????????????0?01????????00?1?1?????0?001?10?????010?????0-  
000?0?0????????1?????N??-?????????0?0?????1?0?-00-01????10002NN001?????????????????01?0---  
?0N0??101?000?0??13?N000?01?0?0?0?100?11?N?0?0??1????1??{0 1}N001111?ONNN-  
??0N?????????????0?01?{0 1}0-0?0?????001?0????0000?

Sulcavis

?10??0?NN0????????????????0010?????????????????111????????0100????????{0 1}??10?0????????00020{0  
1}--0110?10????1??{0 2}1?????{2 3}????2??--3--1N11??2?1?N2??210?0??1NN003000-0100-?2{1  
2}??102??1?????????{1 2 3}?????????1?0?1??0101?N11N010?020001??1??{1 2}1?????0-0?01-110??3010--



????????????1??1??????-?111?1?-??-0?1??1??2?0?00?????????????????????---  
????????11??000??1??10?0001??0?1??11?0?????????????????????001??0  
1)0??????0?0????????????1100?0(0 1){0 1}-? ???????????0????0???

Jibeinia

????????????????????????????????????????????????????????????????????????????2?0?????????0?0202--  
0?2????????????(0 2)????????3????-??-3?-  
????21??1?N2??210?0??N?01????1????????????????????????????12?21????????????0????N?N(0 1)??(0  
1)?0{2 3}00?(0 1)1????0????????(0 1)-????-?10??3010---?????30?1-1(0 1)?1100-0?????????0-  
????????0????????????1?1?2????????????????11(0 1)0????????????????0?????{1 2}1?{1  
2}?11??1010010??-??1?0?10?00{2 3}?00?0?-  
0????????0????????????????0????0????????????????0?1?0????????10????????????1????????0??-  
?????????1?????1????0?????1100????????????2????????????????????????????????????????????00??  
?1?1????0??0?0?1?0?0?0?????1?????????N0?????N????????????????????????????1?????{0 1}{0 1}-  
????????0??-????0?

Hebeiornis

??----

NN????????10????????0????????0????????0????????0????????0?0????????012000-0(0 1)0?????0202--  
?11????????????0????????31?????????????1?1?{2 3}1?2?1?N2??200?0??1N10031??-(0 1)??-  
0?1????????0????2????{1 2 3}12??1??10?1????????111?NNO?0?020001????-????1??0?0-??0????10??2?10--  
????0?30?1-?{1 2}????0?00-??10????-??101????(0 1)0????0?011?3-??1??-0-01????0????1110--??2?01?0?10-  
?02??1{1 2}1?2?11?10?00110??-?1?0?1010-3?010000?00????N?-  
010????????1????12?0??01????0?0?0????????0?1?0?10?0?0110????0-  
0????0?0????????0????????????10?0?0??-??1001?-??-?0?0?1??2?N00????0????01????????00---  
??2??1?0?0?000?????1000001?0?0?0?100?100?N12?101?1??????1N001111?0N?N---????????00??(0 1)?(0  
1)0??10?001?1(0 1)-????1?0?0(0 1)110?0????0?

Gobipipus

?10????????????0????????00????????N????????????1??11????????????1?(0 1)1????????1-1-----  
-?-  
????????0????????????????????????????????????11?N2?0201?000??N?0????????????01?????????????????  
??2-1{ 2}10??0??1?0?N????????????103-????????0-??????101?3?{1  
2}0????????????????????00??10?1(0 1)2-?01?0??-?0????????-??-????2?????  
??1?100??0N????????0??-?{1 2}??1(0 1)-2111??1000?N??????1????????????2?0?0(0  
1)????????0?00?10?1????10?0????????0?1-????????(0 1){0 1}0?0????????1?0????????0?1????0?-  
0????-?00????????1?1????????1????-0????????1????2{1 2}N0?0?????????????????????---  
????0????????????????????10?0?0?101????10N????0?1?000????(0 1)?N000??1(0  
1)?N?N????????????0?0?0?0????????????????0?0?0?0????

Gobipteryx

?1-0?0????1?00?0????010000?????????-

0?0????????0????101?00110?0-?10?1101-1-----?010?0??-111?0?0??{2 3 4  
5}10?0?0????????????20?102-1?(0 1)?????????3??-????-  
2222?02010??????????13??1????1??1011010111110000020001?03--00????1??1-??0-????113?1?--  
101????00??21??-??00?10?1?2-10?1?0-0-0?0??11103--?1??1-0-0120??-??-111{1 2}0-00?1?10??1-0--  
2??121-?111????00??{1 2}????-1?101101?-210?00?000-??1??-??????1?0110??????0?0?1?0?01--  
0?????10????0?0????0?1011-????????11000?0-0?0?0-?00?10????0100?0110-?1?020--?0?110?1?-21(0  
1)(0  
1)0100010011?????120??00?0????0??10?0?11????????00010?000001?0????????0?0?0?0??212?00?  
??10000??-?000?0????00101110?00?01020-0????0??1?1?0?00?0??0

Nanantius

????????????????????????????????????????????????????????????????????????????????????????  
????????????????????????????????????????????????????????????????????????????????????????  
????????????????00??1111????????????????????????????????????????????????????????????????  
????????????????????????????????????????????????????????????????????????????????????????  
????0????????????????????????????????????????????????????????????101????????????????????  
??????110????????????????????????????????????????????????????????????????????????????????  
????????????????????????????????????????????????????????????????????????????????????10101?0  
0????????????????????????0????0

Gurilynia

????????????????????????????????????????????????????????????????????????????????????????  
????????????????????????????????????????????????????????????????002-  
??????????????????????????????????????????????????????????????????????????????????????  
?????????????1????????????????????????????????????????-  
????????????????????????????????????????????????????????????????????????????????????-  
?1????????????????????????10????????????????????????????????????????????????????????111  
1?1????????????????????????????????????????????????????????????????????????????????????  
????????????????????????????????????????????000?0?0?1?0011?0012201??1?0?0????????????????  
????????????????????????????????????????????????????????????0???

Holbotia

??????N????????????????????0????????????????????????????????????????0??01?1????0??0?20{1 2}-  
220????????????????????0????????1??2????????????????????????????????????????(1  
2)????????????????????0?1?????N?N?100?0?0001?03????????????0-  
22????1????0????????0?01??1?1????????0?0?0??1????(0  
1)0?????11????2????????0?????(0 1 2)0?0????????0??1????1????????????1{1  
2}????????0?10??3?0?0????????????????????????????????????0?0?0?0????????????  
????????0????0?????????????????????1??1?20??01?????????1????0??N?00????????????  
????00---?????11?0?0?????{1 2 3 4  
5}??0?0????????????????????????????????????0N?N????0????????{0  
1}?????11??0?0?11????????????0?0?1?????





1)0???02???0????????????????111?10000200?1?2?1?0?11?2?3?10??0?-??0?????00????????????1  
2)00?0?1??-? ?????????????1?1?100????101?{1 2}2????01??1?0?00??0??-  
?????0????????????00?0??11?00????????????2{0 1}0?01?????????????--  
??0????????000????1????0?0?0????0????????????????210000101?0000????0????????????  
10?001?10-?-?????????0??0??00

aberransis

??????0????????????????????????????????????????????????????????????????????????????????01???  
0 1)????????????????????????????????????????????????????????????????????????????????02-  
??0?0????01????????????????????????????????????????????????????????1 2  
3)??????1????????1????????????????????????????????????????????1?????0 1)?????-??0??3?{1  
2)??????0????????????-??????0??0-??????????0????????????????????????????????????11{0  
1)?????????0?????0?????1??111?10?????????????????????????????????0-  
?????????0????????????????????????????????????-????????????????1??????????0????????????????????  
??0????????????????????????????????????????????????????????????????????????????????  
2)????????????????????????????????????????0000????????????0??0????????????????????????0?????????????  
00????1????????????????????????????????????????????????????-?????0????????-????????

Cathayornis\_yandica

?102????????????????????????0?0?1?1?0?0??0?00????????????????????????????12?00????????00020{1 2}-  
0-????????????????????????3????2?--3?-1??210201?02-120000??1111030{0 1}0-010?-222?11?????02????{0 1  
2}??{1 2 3}??2{0 1}??2-21??110?0????111110?0?0??01031??{1 2}??11??0-0310?-11?1?3110--  
11100??????0????-00?200?1{0 1}1-?0??1???10?0????11??-1?1?-?0??0????0??11110?{0  
1}0020?1?0?0??0?11??11-211101000010101-2?1?0?1??-2 3}1010?00-  
00?0??1?0?0??1111??1?1?0110?0?1?10?-??0??0????001?10000?0010???2?????0??100000?0?-  
?0????0????0?0?0?1?1?1?1????0?0?1??1?02{0 1}0?01?????????????????????0?--  
??0??111?0000?0??{2}??10?0001?0000??110001100010201?10?01??2?210000011{0  
1}0000????0??00?1?0?00?0?0?0????{1 2}??-????????01?00-??0????

Sinornis

????1????????????????????????????????????????????????????????????????????????????????00?0????????????????????????????????  
????????????????????????????0?200--31-????????2????{1 2}?????0?01?003000-0000-{0 1}{1 2}??11??10{0  
1}202--201{1 2}1112121??210?0?1????????1111??0?0{2 3}0000????????????????????03??(1 2)-11??3?20--  
??100?3001-1{0 1}????-00?1??1????0?0????????1?0-?1????111??0?0????????????1?{0  
1}????????????????????11??2??11?1000010?01?-1?0?1010-220??10?-  
0??????0?0????????????1????11?0?211??-????????????0??0??0?0?0?0 1}??2100-00????????0?????  
????????0?????1?0??0?21??010?0?0????????10??2??0?0????????1????????????????????021?1????00??  
?????0?0????????????????????????????????????????????10100111{0 1}0000-100????????????????10??1011-0-  
????????00110-????0?0?

Linyiornis

?00????0????????????????0????0????????????????????1?1?0?0?????0?10?????0????????????????0000?????0?  
?0?0????????-2????????2????2?0--3?-10??{1 2 3}1?2?1?02-  
1210?0?1010100?0?0?00?0?1222110?111211??03?121{1 2}??2?02-??0?10?0??10111000?0??001102??{0  
1}????1?{0 1}????-?101130{1 2}0??01100?30?1?1{1 2}????-001?11??1{0 1}-  
0?0?0?0?0?000?0????????12-?????0?0????11{0 1}0?00?0?1110?0??????{1 2}??111-  
2111?1010020?0?2?1?0111?0?22000?0-00?0?0?10?0?0??11??1?0?0?10??001?0?-  
?????0?0?????1010?0??0?0?101{0 1}0 1}2?00-0?0?0?00?0??0??-  
??0????0101????01?0020????010000????????-100?210?0????????????????????--  
??0003111?0000????????0000001000000?1100??1?0102?00101??10{0 1}1?200?0001{0 1}000-  
1000?0?0?0??010?100?0?0?011-?-1????????10?00-0100?0?1

Gracilornis

?1????????????????????????????????????????????????????????????????????????????????2?0??0?????0??????  
????1??{0 1}????{0 2}??????{3 4}0?0?2??--3?-?01?2??2?1?02??200?0??1?10030?{0 1}-?{0 1}??-  
1}2?????21?020??{0 2}????{1 2 3}0{1 2}??21????1?0?12?0??01111000?02000{1 2}113????0 1}??????0?0{1 2  
3}01-?10?3?00?????10??30??-12????0-00????0?1{0 1}-  
????0????????0??11????112??0?0?0?0??????1100??02?01?0?0??{1 2}??12??2?1(0  
1)1?10?2010?0?0??1?0?1101?3{0 1}01?00?-?1?????0?0?0?0?1?????2????????1?-  
?????????????0?1?0?0?0?0?0?10??{1 2}000?0??1?0?0?????  
?????0?0????????????0????01?01?????0??-1??2?0?00?0????????????????????0--  
??00??11??00?0??1??0?0?01?0?0?0??0?10?0102??11??0?0?1?20001?01?0000??0?0?10????0?0?00  
10????010-?-????1????110-00????

Alethoalaornis

????????????????????????????????????0  
1}1????????????????????????????1????????12?0????????-  
????????????????????????????????????--3-???(1 2 3)1?2?1?02??200?0??1?1?03???-0??-  
????????????????????????????1????????????????????2}3}??0{1 2}00????????????????0?????-?101?2?{0  
1}0--?????{2 3}??1?0??11??-00????-  
????????????????????1????0??????0????11??0?0?1?1?0????????????1?1-2?1????01{0 1}{1 2}0??-  
??1?{0 1}10?1-2?01?0?-  
?????????0????????????????????????????????????????1?1?10????????0?????????????????????  
????????????????????????????????????????????????????????????????????????????????0  
2)????????0????????0?0?1?0?0????????????0??1?1????????1?0??1????????????????????????  
?????11??-??????1??0-??????

Cuspirostrisornis

????????????????????????0 1)????{0  
1}0????????????????????????????????????0?0?0{1  
2}????????????????????????{2 3 4}2?????--3-????{2  
3}10??????200?0??11????????????????1????????????????{1 2 3}1{1 2}21????????1?1?????1?11??{0  
1}2{2 3}0?0{0 1}????????????{0 1}????-????3?0????????30??-??????-  
?????????1????0????????0????????????????????????0??1?1????????0????????????11?10?0?  
????????1?0?11??{2 3}0{1 2}??0-0????????????0??0????????????1?0?-????????????{0

























4)?????10?0?01?????????????0??1?0?0?????????????111--?1010?11?0111{1 2}??0?0111?111-1?????????????0?0?0?10

Hesperornis -10---0--?--01?1-10-1?21111100101-01?-0000202--0?-11--  
1010001100?0110102001-?(0 1}1?1101-02{2 3}1--(0 1)020--10100110-221000016100000?003--111-110-  
0100111200-----102201021-2002--20120312-2212-01-111{0 1}11??00111301100{1 2}0??1113--2--  
1?00?0-0210(0 1 2)01101?30----0110012001-000??-0--0-01100000000?1001-110--2110311-12-?0-112010----  
111000-00200000-11-0-0(1 2)01-020-101-----1-1101111?-320001-0--1?-101(0 1)0--00-000-----10-00-0112-  
0??00(0 1)(0 1)00000(0 1)11010110001-0--00{0 1}1?100-?11101001000?1??-0--00011?-1?00?000?00-0011000-  
(0 1)0-01-0-000-10011?01?022111??01100110000----10213010000(0 1)21-000(2 3)00110210000?10101-10010-00-  
10-----10-----111--110100011001112011111111111101-?101-0-100-10-0010-000

Xinghaiornis ?0?{1 2  
3)??010?????????????????0?11????0?20????????????????????????????????02?21??????1-1-----?  
?????????????????{3 4 5}??????-3?-????{2 3}1?2?1?02?12{0 1}010????????{1 2}??-??-?2????2?????--  
20??{2 3}?????0?0?1{1 2}?????111{0 1}??0{1 2}000?113-??2?????0-????-?1?1?3?1?--0?1????1?-  
0{0 1}11??-?????0?12-20????-?-????-?11-3--?????0?0?00??-????1100????2?0?10?????--  
2??1212111?????21????-1-1?0??00-{2 3}{0 1}00?000-1?????????????1?????????????--????--  
????????10?1?100?0??101?????????????????--?00--??-?????????????????1?{0 1}??-  
??1?????1??2{0  
1)??1????????????????????????????????????01????1??0?0?10?1?0???1?100?0?12?0???01??2?{0  
1}201????1{0 1}0111???0?0??0?0??0?101100?0?{0 1}?-?-??????0?0?0-??0?0???

Horezmavis  
????????????????????????????????????????????????????????????????????????????????????????????????  
????????????????????????????????????????????????????????????????????????????????????????????????  
????????????????????????????????????????????????????????????????????????????????????????????????  
3)??10????????????????????????????????????????????????????????????????????????????????????????  
????????????????????????????????????????????????????????????????????????????????????????????  
????????????????????????????????????????????????????????????????????????????????????????????  
????????????????????????????????????????????????????????????????????????????????????????????  
????????????????????????????????????????????????????????????????????????????????????????????  
????????????????????????????????????????????????????????????????????????????????????????????  
3)11????????????????????????????????????????????????????????????????????????????????????????

Maaqwi  
????????????????????????????????????????????????????????????????????????????????????????????????  
????????????????????????????????????????????????????????????????????????????????????????????????  
????????????????????????????????????????????????????????????????????????????????????????????????  
????????????0??0????????????????????????????????????????????????????????????????????????  
????????????????????????????????????????????????????????????????????????????????????????????  
????????????????????????????????????????????????????????????????????????????????????????????  
????????????????????????????????????????????????????????????????????????????????????????????  
3)????????????????????????????????????????????????????????????????????????????????????????{0  
1}????????????????????????????????????????????????????????????????????????????????????????

Jiuquanornis  
????????????????????????????????????????????????????????????????????????????????????????????????  
????????????????????????????????????????????????????????????????????????????????????????????????  
3)100????????????????????????????????????????????????????????????????????????????????????????  
????????????????????????11????????????????????????????????????????????????????????????????  
????????????????????????????????????????????????????????????????????????????????????????  
????????????0????????????????????????????????????????????????????????????????????????  
????????1????????????0????????????????????????????????????????????????????????????????  
????????????????????????????????????????????????????????????????????????????????????????  
????????????????????????????????????????????????????????????????????????????????????????110-10????????

Eogranivora  
??0????????????????????????????????????????????????????????????????????????????????????????  
1??????????-????????????????????????2??-3?-?1?{2 3}1?{0 1}1?02??20100??????02(0 1)01-1100-  
021??1????00?--(1 2){0 1}1?{2 3}?????????1??1?2?????1112?0?1--001113-?-????????{0 1}0?0??0-  
11??3?00--011?1?30?0--0?110?00??{1 2}?????-??0?0??{0 1}??1?0--?????-11?????0?0?0?  
??21110?00?101?????-?{1 2}??1?????111?000?021010-{1 2}-1?1?11--2101?-0?-0??-  
?????0?0?0?0?0?0?0?0?0?0?0?0?0?0?0?0?0?0?0?0?0?0?0?0?0?0?0?0?0?0?0?0?0?0?0?0?0?0?0?0?0?0?0?0?  
??-?0?0?0?0?0?0?0?0?0?0?0?0?0?0?0?0?0?0?0?0?0?0?0?0?0?0?0?0?0?0?0?0?0?0?0?0?0?0?0?0?0?0?0?0?  
2}1?1??{3 4 5}1000?10?1?1?????1????000?????1????????{0 1}21030??0{0 1}0?1?0-  
??1????????????????010??-11??-??0?0??0?0-00-??0?0???

Qinornis  
????????????????????????????????????????????????????????????????????????????????????????????????  
????????????????????????????????????????????????????????????????????????????????????????????????  
????????????????1?????001112??1?0{2 3}0001????????????????????????????????????????????????  
1)????????????????????????0????????????????1  
2)????????????????????????????????????????????????????????????????????????????????????????  
????????????????????????????????????????????????????????????????????????????????????????  
????????????????????????????????????????????????????????????????????????????????????????0?  
1)????????????????????????????????????????????????????????????????????????????????????????  
????????????????????????????????????????????????????????????????????????????????????????121{1 2}0?0?0210?11-???

Iaceornis  
????????????????????????????????????????????????????????????????????????????????????????????????  
????????????????????????????????????????????????????????????????????????????????????????????????  
????????????????????????????????????????????????????????????????????????????????????????????????  
2){0 1}0?012?31{2 3}0?12-  
01?211?1????0011????????????????????????????????????????1010????????1101????????????0?00??20??1{0 1}?-  
0?0????0?0?1?10????????12-????????????????1????????????????????????????????????21-21?1?0000021?-  
?221????????1????001????????11????0?1?????21?00????-????????????????0?0????????00?0?1





1}??1113011010??011??11??10??000??0000011?0{0  
1}??1113011010??011??11??12??1??1??11111-??1??000??0-1??0????  
Sylvionris ?00---0---?-?10?-1000??1?1100101-011-1000--2-100-01001000110101--11-  
00??????0??101-1-----10000111022110000{6 7}??0??????????1???(1 2 3)?0?01002-12000011?11100{0 1 2  
3}??????????????1?001??1??1??1??1??1??10111301100?00?{1 2}003---0-01000?1-  
02?0??2010110??0??1?100000??11??000?011?0?02-100001?-?-??0??2??0?--??-?-?-?120-?----1?011?-  
0?211100-0??0--(1 2){0 1}1??21-01111?000??????????00?11?0?2{1 2}010001?00?1-011??0?--1?101011??{1  
2}??00?000?01-1--?1000011?0101001?1?1?1??1?1?1??1?1?1?1000??1-??-0---0?010?-1001001??0-  
??10?10--0---??0?1?11121011-11-02{1 2}?1011012111101?0101?11213010112??1?1??2??101?10111-  
11?10?11?012100000010001{0 1}?11301101?111?-?????110002120111?1311?10111?0??10-  
??????0010?0?0  
Meleagris 110---0-----10-1-10-2-2011100101-111-1010202-000-01001100110110--11-  
0112020--0021101-1-----101011?0-221000{0 1}171000200---3--111-310211002-12000011111003-----  
112211021-2011--21{1 2}20313-0212-010111111??001113{0 1}11002000?113---1-0110000-02102-110103{0 1}10---  
0110111011-(0 1)11100-00001001102-100001?0--100--2--03--112-?-0-2120-1----11100-00210110-10-0--211-121-  
1111101000{0 1}210---1-10011110-32010000-11?--0110-100---??100110101?2?1-?0?0101-01-1--(0  
1)1110011111010011??0?100012100?010011100000?1-?---0001??-10010000100-0011000--1--01-  
1100011101121110211101101211110100110-1121301011200111121001011001{0 1}111-11011011100-  
1100110110021111{0 1}30111201111-111111111002{0 1}1011111311020110-010000-?10010-0000-010  
Cerebavis ??????0?0??--?1?1-  
11?10????????????????????????????????????????????????????????????????????????????????????????  
????????????????????????????????????????????????????????????????????????????????????????  
????????????????????????????????????????????????????????????????????????????????????????  
????????????????????????????????????????????????????????????????????????????????????????  
????????????????????????????????????????????????????????????????????????????????????????  
????????????????????????????????????????????????????????????????????????????????????????  
-  
?0??????0????????????????????????????????????????????????????????????????????????????????  
????????????????????????????????????????????????????????????????????????????????????????  
????????????????????

END;

BEGIN ASSUMPTIONS;

OPTIONS DEFTYPE = UNORD POLYTCOUNT = MINSTEPS;  
TYPESET \* UNTITLED = unord: 1- 3 5- 21 23 27 29- 43 45 47- 70 72- 73 75 77- 79 81 83- 88 92- 94 97-  
113 115- 116 118 120- 121 123- 125 129 131- 134 136- 137 139- 142 144- 145 148- 149 151- 157 160 164 166- 168  
173- 175 177- 178 184 186-189\3 193-196\3 198 200- 204 206- 215 217- 218 220- 221 223- 225 227- 228 230- 232  
234- 240 242- 243 245- 246 249- 253 255 259- 266 268- 271 274- 283 285- 289 291- 299 301- 305 307- 308 310- 312  
314 316- 317 320- 323 325 327- 336 338- 339 341- 342 344- 355 358- 360 362- 363 365- 373 376- 379 383- 384 386-  
391 394 396- 413 415- 424 426- 427 429 431- 437 439- 455 457- 469 473- 490 492- 495 497- 514 516- 523 525- 539  
542- 545 547- 551 553- 555 557- 559 561- 566 568- 576 578- 582 584 586 588- 589 592 594- 596 598- 617 620- 629  
631- 632 634- 635 637- 640 642- 657 659 661 663 665- 668 670- 672 676- 700, ord: 4 22 24- 26 28 44 46 71-74\3 76  
80 82 89- 91 95- 96 114-117\3 119-122\3 126- 128 130 135-138\3 143-146\3 147-150\3 158- 159 161- 163 165 169-  
172 176-179\3 180- 183 185 187- 188 190- 192 194- 195 197 199 205 216-222\3 226-229\3 233 241-247\3 248 254  
256- 258 267 272- 273 284 290 300 306-309\3 313 315-318\3 319 324 326 337-343\3 356- 357 361-364\3 374- 375  
380- 382 385 392- 393 395 414 425-428\3 430 438 456 470- 472 491 496 515 524 540- 541 546 552 556 560 567 577  
583 585 587-590\3 591 593 597 618- 619 630-636\3 641 658 660 662 664 669 673- 675;  
TYPESET default = unord: 1- 3 5- 21 23 27 29- 43 45 47- 70 72- 73 75 77- 79 81 83- 88 92- 94 97- 113 115- 116 118  
120- 121 123- 125 129 131- 134 136- 137 139- 142 144- 145 148- 149 151- 157 160 164 166- 168 173- 175 177- 178  
184 186-189\3 193-196\3 198 200- 204 206- 215 217- 218 220- 221 223- 225 227- 228 230- 232 234- 240 242- 243  
245- 246 249- 253 255 259- 266 268- 271 274- 283 285- 289 291- 299 301- 305 307- 308 310- 312 314 316- 317 320-  
323 325 327- 336 338- 339 341- 342 344- 355 358- 360 362- 363 365- 373 376- 379 383- 384 386- 391 394 396- 413  
415- 424 426- 427 429 431- 437 439- 455 457- 469 473- 490 492- 495 497- 514 516- 523 525- 539 542- 545 547- 551  
553- 555 557- 559 561- 566 568- 576 578- 582 584 586 588- 589 592 594- 596 598- 617 620- 629 631- 632 634- 635  
637- 640 642- 657 659 661 663 665- 668 670- 672 676- 700, ord: 4 22 24- 26 28 44 46 71-74\3 76 80 82 89- 91 95- 96  
114-117\3 119-122\3 126- 128 130 135-138\3 143-146\3 147-150\3 158- 159 161- 163 165 169- 172 176-179\3 180-



183 185 187- 188 190- 192 194- 195 197 199 205 216-222\3 226-229\3 233 241-247\3 248 254 256- 258 267 272- 273  
284 290 300 306-309\3 313 315-318\3 319 324 326 337-343\3 356- 357 361-364\3 374- 375 380- 382 385 392- 393  
395 414 425-428\3 430 438 456 470- 472 491 496 515 524 540- 541 546 552 556 560 567 577 583 585 587-590\3 591  
593 597 618- 619 630-636\3 641 658 660 662 664 669 673- 675;

END;

BEGIN PAUP;

pset msTaxa = variable opt = deltran;

END;

BEGIN MESQUITECHARMODELS;

ProbModelSet \* UNTITLED = 'Mk1 (est.): 1- 700;

END;

BEGIN NOTES;

SU C = 219 N = color l = 5;  
SU T = 1 C = 219 N = color l = 5;  
SU T = 2 C = 219 N = color l = 5;  
SU T = 3 C = 219 N = color l = 5;  
SU T = 4 C = 219 N = color l = 5;  
SU T = 5 C = 219 N = color l = 5;  
SU T = 6 C = 219 N = color l = 5;  
SU T = 7 C = 219 N = color l = 5;  
SU T = 8 C = 219 N = color l = 5;  
SU T = 9 C = 219 N = color l = 5;  
SU T = 10 C = 219 N = color l = 5;  
SU T = 11 C = 219 N = color l = 5;  
SU T = 12 C = 219 N = color l = 5;  
SU T = 13 C = 219 N = color l = 5;  
SU T = 14 C = 219 N = color l = 5;  
SU T = 15 C = 219 N = color l = 5;  
SU T = 16 C = 219 N = color l = 5;  
SU T = 17 C = 219 N = color l = 5;  
SU T = 18 C = 219 N = color l = 5;  
SU T = 19 C = 219 N = color l = 5;  
SU T = 20 C = 219 N = color l = 5;  
SU T = 21 C = 219 N = color l = 5;  
SU T = 22 C = 219 N = color l = 5;  
SU T = 23 C = 219 N = color l = 5;  
SU T = 24 C = 219 N = color l = 5;  
SU T = 25 C = 219 N = color l = 5;  
SU T = 26 C = 219 N = color l = 5;  
SU T = 27 C = 219 N = color l = 5;  
SU T = 28 C = 219 N = color l = 5;  
SU T = 29 C = 219 N = color l = 5;  
SU T = 30 C = 219 N = color l = 5;  
SU T = 31 C = 219 N = color l = 5;  
SU T = 32 C = 219 N = color l = 5;  
SU T = 33 C = 219 N = color l = 5;  
SU T = 34 C = 219 N = color l = 5;  
SU T = 35 C = 219 N = color l = 5;  
SU T = 36 C = 219 N = color l = 5;  
SU T = 37 C = 219 N = color l = 5;  
SU T = 38 C = 219 N = color l = 5;  
SU T = 39 C = 219 N = color l = 5;  
SU T = 40 C = 219 N = color l = 5;  
SU T = 41 C = 219 N = color l = 5;  
SU T = 42 C = 219 N = color l = 5;  
SU T = 43 C = 219 N = color l = 5;  
SU T = 44 C = 219 N = color l = 5;  
SU T = 45 C = 219 N = color l = 5;  
SU T = 46 C = 219 N = color l = 5;  
SU T = 47 C = 219 N = color l = 5;  
SU T = 48 C = 219 N = color l = 5;  
SU T = 49 C = 219 N = color l = 5;  
SU T = 50 C = 219 N = color l = 5;  
SU T = 51 C = 219 N = color l = 5;  
SU T = 52 C = 219 N = color l = 5;  
SU T = 53 C = 219 N = color l = 5;  
SU T = 54 C = 219 N = color l = 5;  
SU T = 55 C = 219 N = color l = 5;  
SU T = 56 C = 219 N = color l = 5;  
SU T = 57 C = 219 N = color l = 5;  
SU T = 58 C = 219 N = color l = 5;











SU T = 439 C = 219 N = color l = 5;  
SU T = 440 C = 219 N = color l = 5;  
SU T = 441 C = 219 N = color l = 5;  
SU T = 442 C = 219 N = color l = 5;  
SU T = 443 C = 219 N = color l = 5;  
SU T = 444 C = 219 N = color l = 5;  
SU T = 445 C = 219 N = color l = 5;  
SU T = 446 C = 219 N = color l = 5;  
SU T = 447 C = 219 N = color l = 5;  
SU T = 448 C = 219 N = color l = 5;  
SU T = 449 C = 219 N = color l = 5;  
SU T = 450 C = 219 N = color l = 5;  
SU T = 451 C = 219 N = color l = 5;  
SU T = 452 C = 219 N = color l = 5;  
SU T = 453 C = 219 N = color l = 5;  
SU T = 454 C = 219 N = color l = 5;  
SU T = 455 C = 219 N = color l = 5;  
SU T = 456 C = 219 N = color l = 5;  
SU T = 457 C = 219 N = color l = 5;  
SU T = 458 C = 219 N = color l = 5;  
SU T = 459 C = 219 N = color l = 5;  
SU T = 460 C = 219 N = color l = 5;  
SU T = 461 C = 219 N = color l = 5;  
SU T = 462 C = 219 N = color l = 5;  
SU T = 463 C = 219 N = color l = 5;  
SU T = 464 C = 219 N = color l = 5;  
SU T = 465 C = 219 N = color l = 5;  
SU T = 466 C = 219 N = color l = 5;  
SU T = 467 C = 219 N = color l = 5;  
SU T = 468 C = 219 N = color l = 5;  
SU T = 469 C = 219 N = color l = 5;  
SU T = 470 C = 219 N = color l = 5;  
SU T = 471 C = 219 N = color l = 5;  
SU T = 472 C = 219 N = color l = 5;  
SU T = 473 C = 219 N = color l = 5;  
SU T = 474 C = 219 N = color l = 5;  
SU T = 475 C = 219 N = color l = 5;  
SU T = 476 C = 219 N = color l = 5;  
SU T = 477 C = 219 N = color l = 5;  
SU T = 478 C = 219 N = color l = 5;  
SU T = 479 C = 219 N = color l = 5;  
SU T = 480 C = 219 N = color l = 5;  
SU T = 481 C = 219 N = color l = 5;  
SU T = 482 C = 219 N = color l = 5;  
SU T = 483 C = 219 N = color l = 5;  
SU T = 484 C = 219 N = color l = 5;  
SU T = 485 C = 219 N = color l = 5;  
SU T = 486 C = 219 N = color l = 5;  
SU T = 487 C = 219 N = color l = 5;  
SU T = 488 C = 219 N = color l = 5;  
SU T = 489 C = 219 N = color l = 5;  
SU T = 490 C = 219 N = color l = 5;  
SU T = 491 C = 219 N = color l = 5;  
SU T = 492 C = 219 N = color l = 5;  
SU T = 493 C = 219 N = color l = 5;  
SU T = 494 C = 219 N = color l = 5;  
SU T = 495 C = 219 N = color l = 5;  
SU T = 496 C = 219 N = color l = 5;  
SU T = 497 C = 219 N = color l = 5;  
SU T = 498 C = 219 N = color l = 5;  
SU T = 499 C = 219 N = color l = 5;  
SU T = 500 C = 219 N = color l = 5;  
SU T = 501 C = 219 N = color l = 5;  
SU T = 502 C = 219 N = color l = 5;

TEXT TAXON = 289 CHARACTER = 223 TEXT = 0;

END;

Begin MESQUITE;

MESQUITESCRIPTVERSION 2;  
TITLE AUTO;  
tell ProjectCoordinator;  
timeSaved 1605990840904;  
getEmployee #mesquite.minimal.ManageTaxa.ManageTaxa;  
tell It;

```

setID 0 4680078835126459546;
tell It;
    setDefaultOrder 0 1 2 3 4 5 6 7 8 9 10 11 12 13 14 15 16 17 18 19 20 21 22 23
24 25 26 27 28 29 30 31 32 33 34 35 36 37 38 39 40 41 42 43 44 45 46 47 48 49 50 51 52 53 54 55 56 57 58 59 60 61
62 63 64 65 66 67 68 69 70 71 72 73 74 75 76 77 78 79 80 81 82 83 84 85 86 87 88 89 90 91 92 93 94 95 96 97 98 99
100 101 102 103 104 105 106 107 108 109 110 111 112 113 114 115 116 117 118 119 120 121 122 123 124 125 126
127 128 129 130 131 132 133 134 135 136 137 138 139 140 141 142 143 144 145 146 147 148 149 150 151 152 153
154 155 156 157 158 159 160 161 162 163 164 165 166 167 168 169 170 171 172 173 174 175 176 177 178 179 180
181 182 183 184 185 186 187 188 189 190 191 192 193 194 195 196 197 198 199 200 201 202 203 204 205 206 207
208 209 210 211 212 213 214 215 216 217 218 219 220 221 222 223 224 225 226 227 228 229 230 231 232 233 234
235 236 237 238 239 240 241 242 243 244 245 246 247 248 249 250 251 252 253 254 255 256 257 258 259 260 261
262 263 264 265 266 267 269 270 271 272 273 274 275 276 277 278 279 280 281 282 283 284 285 286 287 288 501
268 289 290 291 292 293 294 295 296 297 298 299 300 301 302 303 304 305 306 307 308 309 310 311 312 313 314
315 316 317 318 319 320 321 322 323 324 325 326 327 328 329 330 331 332 333 334 335 336 337 338 339 340 341
342 343 344 345 346 347 348 349 350 351 352 353 354 355 356 357 358 359 360 361 362 363 364 365 366 367 368
369 370 371 372 373 374 375 376 377 378 379 380 381 382 383 384 385 386 387 388 389 390 391 392 393 394 395
396 397 398 399 400 401 402 403 404 405 406 407 408 409 410 411 412 413 414 415 416 417 418 419 420 421 422
423 424 425 426 427 428 429 430 431 432 433 434 435 436 437 438 439 440 441 442 443 444 445 446 447 448 449
450 451 452 453 454 455 456 457 458 459 460 461 462 463 464 465 466 467 468 469 470 471 472 473 474 475 476
477 478 479 480 481 482 483 484 485 486 487 488 489 490 491 492 493 494 495 496 497 498 499 500;
    attachments ;
endTell;
endTell;
getEmployee #mesquite.charMatrices.ManageCharacters.ManageCharacters;
tell It;
    setID 0 8922971771042771389;
    mqVersion 361;
    checksumv 0 3 714075737 null getNumChars 700 numChars 700 getNumTaxa 502
numTaxa 502 short true bits 2305843009213695231 states 1279 sumSquaresStatesOnly 1.036131643E9
sumSquares -1.9784133019052957E22 longCompressibleToShort false usingShortMatrix true NumFiles 1
NumMatrices 1;
    mqVersion;
endTell;
getWindow;
tell It;
    suppress;
    setResourcesState false false 100;
    setPopoutState 300;
    setExplanationSize 0;
    setAnnotationSize 0;
    setFontIncAnnot 0;
    setFontIncExp 0;
    setSize 1315 541;
    setLocation 31 49;
    setFont SanSerif;
    setFontSize 10;
    getToolPalette;
    tell It;
    endTell;
    desuppress;
endTell;
getEmployee #mesquite.charMatrices.BasicDataWindowCoord.BasicDataWindowCoord;
tell It;
    showDataWindow #8922971771042771389
#mesquite.charMatrices.BasicDataWindowMaker.BasicDataWindowMaker;
tell It;
    getWindow;
    tell It;
        setExplanationSize 30;
        setAnnotationSize 20;
        setFontIncAnnot 0;
        setFontIncExp 0;
        setSize 1215 469;
        setLocation 31 49;
        setFont SanSerif;
        setFontSize 10;
        getToolPalette;
        tell It;
            setTool
mesquite.charMatrices.BasicDataWindowMaker.BasicDataWindow.ibeam;
endTell;
setActive;
setTool
mesquite.charMatrices.BasicDataWindowMaker.BasicDataWindow.ibeam;
colorCells #mesquite.charMatrices.NoColor.NoColor;

```



```

        colorRowNames
#mesquite.charMatrices.TaxonGroupColor.TaxonGroupColor;
        colorColumnNames
#mesquite.charMatrices.CharGroupColor.CharGroupColor;
        colorText #mesquite.charMatrices.NoColor.NoColor;
        setBackground White;
        toggleShowNames on;
        toggleShowTaxonNames on;
        toggleTight off;
        toggleThinRows off;
        toggleShowChanges on;
        toggleSeparateLines off;
        toggleShowStates on;
        toggleReduceCellBorders off;
        toggleAutoWCharNames on;
        toggleAutoTaxonNames off;
        toggleShowDefaultCharNames off;
        toggleConstrainCW on;
        toggleBirdsEye off;
        toggleShowPaleGrid off;
        toggleShowPaleCellColors off;
        toggleShowPaleExcluded off;
        togglePaleInapplicable on;
        togglePaleMissing off;
        toggleShowBoldCellText off;
        toggleAllowAutosize on;
        toggleColorsPanel off;
        toggleDiagonal on;
        setDiagonalHeight 80;
        toggleLinkedScrolling on;
        toggleScrollLinkedTables off;
    endTell;
    showWindow;
    getWindow;
    tell It;
        forceAutosize;
    endTell;
    getEmployee #mesquite.charMatrices.AlterData.AlterData;
    tell It;
        toggleBySubmenus off;
    endTell;
    getEmployee #mesquite.charMatrices.ColorByState.ColorByState;
    tell It;
        setStateLimit 9;
        toggleUniformMaximum on;
    endTell;
    getEmployee #mesquite.charMatrices.ColorCells.ColorCells;
    tell It;
        setColor Red;
        removeColor off;
    endTell;
    getEmployee #mesquite.categ.StateNamesStrip.StateNamesStrip;
    tell It;
        showStrip off;
    endTell;
    getEmployee #mesquite.charMatrices.AnnotPanel.AnnotPanel;
    tell It;
        togglePanel off;
    endTell;
    getEmployee #mesquite.charMatrices.CharReferenceStrip.CharReferenceStrip;
    tell It;
        showStrip off;
    endTell;
    getEmployee #mesquite.charMatrices.QuickKeySelector.QuickKeySelector;
    tell It;
        autotabOff;
    endTell;
    getEmployee #mesquite.charMatrices.SelSummaryStrip.SelSummaryStrip;
    tell It;
        showStrip off;
    endTell;
    getEmployee
#mesquite.categ.SmallStateNamesEditor.SmallStateNamesEditor;
    tell It;
        panelOpen true;
    endTell;

```

```
end;
endTell;
endTell;
endTell;
```
